# Supplementary material for: Dementia Prevalence, Comorbidities, and Lifestyle Among Jatinangor Elders
Source: Front Neurol. 2021 Jul 23;12:643480. doi: 10.3389/fneur.2021.643480 (PMC8345013; doi:10.3389/fneur.2021.643480)
Supplement: Supplementary file 1 [file Data_Sheet_1.xlsx]

## Sheet: Sheet1
No.	Participant	Category	Age		Education		Sex	Marital Status	Income	Occupation Class	Living Area	Blood Pressure		BMI	GDS	Lab			Risk Factors											Leissure Activities
			Years	Category	Years	Category						Sistol	Diastol			Glucose	Triglyceride	HDL	Hypertension	BMI Category	Diabetes	Triglyceride>200	HDL<40	Smoking Status	Stroke	Depression	INA-AD8	ADL	AMT	Intelectual 1	Intelectual 2	Intelectual 3	Intelectual 4	Intelectual 5	Intelectual 6	Intelectual 7	Intelectual 8	Social 1	Social 2	Social 3	Social 4	Social 5	Social 6	Social 7	Social 8	Social 9	Recreational 1	Recreational 2	Recreational 3
1	80001	Dementia	70	60-74	3	0-6 years	Female	Married	No Income	housewife	Rural	150	60	19.95	3	81	90	67	Hypertension	Normal	Normal	Normal	Normal	Not Smoking	Normal	Normal	3	0		No	No	No	No	No	No	No	No	No	Yes	Yes	No	No	No	No	Yes	No	No	No	Yes
2	80002	Normal	63	60-74	0	0-6 years	Female	Single	< monthly minimum wage	profesional	Rural	140	90	22.04	1	82	61	70	Normal	Normal	Normal	Normal	Normal	Not Smoking	Normal	Normal	1	0		Yes	No	No	No	No	Yes	No	No	No	No	Yes	No	Yes	No	Yes	Yes	No	Yes	Yes	Yes
3	80003	Normal	64	60-74	6	0-6 years	Female	Married	No Income	housewife	Rural	150	100	22.02	0				Hypertension	Normal					Normal	Normal	1	0		Yes	No	No	No	No	No	No	No	No	No	Yes	No	Yes	No	No	Yes	No	Yes	Yes	Yes
4	80004	Normal	62	60-74	6	0-6 years	Female	Married	≥ monthly minimum wage	housewife	Rural	120	80	28.77	0	86	183	42	Normal	Overweight	Normal	Normal	Normal	Not Smoking	Normal	Normal	3	0		No	No	No	No	No	No	No	No	No	Yes	Yes	Yes	No	No	No	Yes	No	Yes	Yes	Yes
5	80005	Dementia	78	>75	3	0-6 years	Female	Married	No Income	housewife	Rural	210	100	24.79	6	95	229	60	Hypertension	Normal	Normal	High Risk	Normal		Normal	Normal	0	1		No	No	No	No	No	No	No	No	No	Yes	No	No	Yes	No	No	Yes	No	No	No	Yes
6	80006	Dementia	78	>75	0	0-6 years	Female	Married	No Income	housewife	Rural	130	80	21.7	9	119	97	49	Normal	Normal	Normal	Normal	Normal	Not Smoking	Normal	Normal	7	6		No	No	No	No	No	No	No	No	Yes	No	No	No	No	No	No	Yes	No	No	No	Yes
7	80007	Normal	75	>75	6	0-6 years	Female	Single	No Income	housewife	Rural	180	80	18.99	2				Hypertension	Normal				Not Smoking	Normal	Normal	3	6		No	No	No	No	No	No	No	No	No	No	Yes	No	No	No	No	Yes	No	Yes	Yes	Yes
8	80009	Normal	64	60-74	4	0-6 years	Female	Married	No Income	housewife	Rural	110	80	28.38	8	87	181	33	Normal	Overweight	Normal	Normal	High Risk		Normal	Normal	1	0		No	No	No	No	Yes	No	No	No	Yes	No	Yes	No	No	No	No	Yes	No	Yes	Yes	Yes
9	80010	Dementia	66	60-74	2	0-6 years	Female	Single	No Income	notworking	Rural	110	70	23.07	4				Normal	Normal				Not Smoking	Normal	Normal	7	2		Yes	Yes	No	No	No	No	No	No	No	No	Yes	No	Yes	No	No	Yes	No	Yes	Yes	Yes
10	80011	Dementia	73	60-74	0	0-6 years	Female	Single	No Income	housewife	Rural	190	100	18.31	1	107	77	69	Hypertension	Underweight	Normal	Normal	Normal		Normal	Normal	2	4		No	No	No	No	Yes	No	No	No	No	No	No	No	No	Yes	No	No	Yes	Yes	No	Yes
11	80012	Dementia	88	>75	0	0-6 years	Female	Single	No Income	housewife	Rural	130	70	20.06		86	75	59	Normal	Normal	Normal	Normal	Normal	Not Smoking	Normal		1	2
12	80013	Normal	64	60-74	6	0-6 years	Female	Married	No Income	housewife	Rural	130	80	22.62	5	91	46	49	Normal	Normal	Normal	Normal	Normal	Not Smoking	Normal	Normal	1	1		Yes	No	No	No	Yes	No	No	No	Yes	Yes	No	No	Yes	No	No	Yes	No	Yes	Yes	Yes
13	80014	Normal	74	60-74	5	0-6 years	Male	Married	No Income	notworking	Rural	130	90	16.02	5	125	65	57	Normal	Underweight	Normal	Normal	Normal	Smoking	Normal	Normal	3	0		Yes	No	No	No	Yes	No	No	No	No	Yes	Yes	Yes	Yes	No	No	Yes	No	Yes	Yes	No
14	80015	Dementia	82	>75	1	> 7 years	Female	Single			Rural	120	80	14.6	6	85	143	61	Normal	Underweight	Normal	Normal	Normal		Normal	Normal	3	7		No	No	No	No	No	No	No	No	No	No	No	No	No	No	No	Yes	No	No	Yes	No
15	80016	Normal	64	60-74	15	0-6 years	Female	Married	≥ monthly minimum wage	profesional	Rural	130	80	20.53	2	81	107	53	Normal	Normal	Normal	Normal	Normal	Not Smoking	Normal	Normal	1	0		Yes	No	No	No	Yes	No	No	No	No	Yes	No	No	Yes	No	No	Yes	No	Yes	No	Yes
16	80017	Normal	68	60-74	6	0-6 years	Female	Married	No Income	notworking	Rural	130	80	17.6	3	80	59	62	Normal	Underweight	Normal	Normal	Normal	Not Smoking	Normal	Normal	4	0		No	No	No	No	No	No	No	No	No	No	Yes	No	No	No	Yes	No	No	Yes	Yes	Yes
17	80018	Normal	62	60-74	6	0-6 years	Female	Married	No Income	housewife	Rural	90	60	28.17	0	86	103	47	Normal	Overweight	Normal	Normal	Normal	Not Smoking	Normal	Normal	1	3		Yes	No	No	No	No	No	No	No	No	Yes	No	No	No	No	No	Yes	No	Yes	No	Yes
18	80019	Normal	64	60-74	2	0-6 years	Female	Married	No Income	housewife	Rural	100	50	24.37	5				Normal	Normal				Not Smoking	Normal	Normal	4	1		No	No	No	No	No	No	No	No	No	No	No	No	Yes	No	No	Yes	No	Yes	No	Yes
19	80020	Normal	60	60-74	5	0-6 years	Female	Single	No Income	housewife	Rural	140	80	23.78	8	102	127	42	Normal	Normal	Normal	Normal	Normal	Not Smoking	Normal	Normal	1	0		Yes	No	No	No	No	No	No	No	No	No	Yes	No	Yes	No	No	Yes	No	Yes	Yes	Yes
20	80021	Dementia	78	>75	0	0-6 years	Female	Single	No Income	notworking	Rural	130	80	25.41	0	88	107	43	Normal	Overweight	Normal	Normal	Normal	Not Smoking	Normal	Normal	6	6		No	No	No	No	No	No	No	No	No	No	No	No	No	No	No	No	Yes	No	No	Yes
21	80022	Dementia	81	>75	0	0-6 years	Male	Married	< monthly minimum wage	labour	Rural	150	80	20.22	9				Hypertension	Normal				Smoking	Normal	Normal	6	10		No	No	Yes	No	No	No	No	No	No	Yes	Yes	No	No	No	No	Yes	No	No	No	No
22	80023	Normal	66	60-74	5	0-6 years	Male	Married	< monthly minimum wage	labour	Rural	130	60	20.02	14	87	69	49	Normal	Normal	Normal	Normal	Normal	Smoking	Normal	Depression	2	1		Yes	No	No	No	Yes	Yes	No	No	Yes	No	Yes	No	No	No	No	Yes	No	Yes	No	No
23	80024	Normal	72	60-74	6	> 7 years	Male	Married	No Income	notworking	Rural	190	100	23.27	7	106	124	43	Hypertension	Normal	Normal	Normal	Normal		Normal	Normal	4	1		No	No	No	No	Yes	No	No	No	Yes	No	Yes	No	Yes	No	No	Yes	No	Yes	No	No
24	80025	Normal	70	60-74	15	> 7 years	Male	Married	≥ monthly minimum wage	profesional	Rural	130	70	22.61	6	88	87	48	Normal	Normal	Normal	Normal	Normal	Smoking	Normal	Normal	0	0		Yes	No	No	No	Yes	No	No	No	Yes	No	No	No	Yes	No	No	Yes	No	Yes	Yes	No
25	80026	Dementia	80	>75	15	0-6 years	Male	Single	≥ monthly minimum wage	profesional	Rural	170	90	17.57	6	106	98	46	Hypertension	Underweight	Normal	Normal	Normal	Smoking	Normal	Normal	1	14		Yes	No	No	Yes	Yes	No	No	No	No	No	No	No	Yes	No	Yes	Yes	No	Yes	Yes	No
26	80027	Normal	77	>75	2	0-6 years	Male	Married	< monthly minimum wage	labour	Rural	130	80	20.03	4	93	126	35	Normal	Normal	Normal	Normal	High Risk		Normal	Normal	1	10		Yes	No	No	No	No	No	No	No	No	No	Yes	No	No	No	No	Yes	No	No	No	No
27	80028	Normal	61	60-74	5	0-6 years	Female	Single			Rural	120	70	25.71	7	105	164	58	Normal	Overweight	Normal	Normal	Normal	Not Smoking	Normal	Normal	4	1		Yes	No	No	No	Yes	No	No	No	No	No	Yes	No	Yes	No	No	Yes	No	Yes	Yes	No
28	80029	Normal	64	60-74	6	0-6 years	Male	Married	< monthly minimum wage	profesional	Rural	160	90	19.19	11	79	78	28	Hypertension	Normal	Normal	Normal	High Risk	Smoking	Normal	Depression	0	0		No	No	No	No	No	No	No	No	No	No	Yes	No	Yes	No	No	Yes	No	Yes	Yes	Yes
29	80030	Dementia	76	>75	3	0-6 years	Male	Married			Rural	134	74		4				Normal					Smoking	stroke	Normal	3	23		No	No	No	No	Yes	Yes	No	No	No	Yes	Yes	No	No	No	Yes	No	No	Yes	Yes	No
30	80031	Dementia	64	60-74	3	0-6 years	Male	Married			Rural	100	70	18.46	8	100	57	53	Normal	Underweight	Normal	Normal	Normal		Normal	Normal	5	13		No	No	No	No	No	No	No	No	No	Yes	Yes	No	Yes	No	No	Yes	No	Yes	No	No
31	80032	Dementia	64	60-74	1	0-6 years	Male	Married			Rural	120	60	19.35	0				Normal	Normal					Normal	Normal	5	13		No	No	No	No	No	No	No	No	No	No	Yes	No	No	No	No	Yes	No	Yes	No	No
32	80033	Normal	65	60-74	6	0-6 years	Male	Married	≥ monthly minimum wage	profesional	Rural	150	80	24.67	1				Hypertension	Normal					Normal	Normal	0	0		No	No	No	No	No	No	No	No	No	Yes	Yes	No	No	No	Yes	Yes	No	Yes	Yes	Yes
33	80036	Dementia	83	>75	3	0-6 years	Male	Married	No Income	notworking	Rural				8	78	84	44			Normal	Normal	Normal		Normal	Normal	7	10		No	No	No	No	No	No	No	Yes	No	No	No	No	No	No	No	Yes	No	No	No	No
34	80037	Dementia	78	>75	2	0-6 years	Female	Single	No Income	housewife	Rural	180	90		4	95	231	40	Hypertension		Normal	High Risk	Normal	Not Smoking	stroke	Normal	5	23		No	No	No	No	No	No	No	No	No	No	No	No	No	No	No	Yes	No	Yes	Yes	No
35	80038	Normal	78	>75	1	0-6 years	Female	Married	< monthly minimum wage	labour	Rural	145	95	17.26	10	84	95	53	Hypertension	Underweight	Normal	Normal	Normal		Normal	Depression	0	0		No	No	No	No	No	No	No	No	No	No	Yes	No	No	No	No	Yes	No	Yes	Yes	Yes
36	80039	Dementia	73	60-74	2	0-6 years	Male	Married			Rural	170	85	21.1	15				Hypertension	Normal					Normal	Depression	8	6		No	No	No	No	No	No	No	No	No	No	Yes	No	No	No	No	Yes	No	Yes	No	No
37	80040	Normal	67	60-74	6	0-6 years	Male	Married	≥ monthly minimum wage	profesional	Rural	148	78	17.96	3				Hypertension	Underweight				Smoking	Normal	Normal	1	1		Yes	No	No	No	Yes	No	No	No	Yes	Yes	Yes	No	Yes	No	No	Yes	No	Yes	Yes	Yes
38	80042	Normal	65	60-74	4	0-6 years	Female	Single	No Income	housewife	Rural	140	90	25.44	13	88	112	73	Normal	Overweight	Normal	Normal	Normal	Not Smoking	Normal	Depression	0	0	6	No	No	No	No	No	No	No	No	No	No	No	No	No	No	No	Yes	No	Yes	No	Yes
39	80043	Normal	65	60-74	6	0-6 years	Female	Married	No Income	notworking	Rural	140	100	30.57	1	94	94	60	Hypertension	Obesitas	Normal	Normal	Normal	Not Smoking	Normal	Normal	0	0	6	Yes	No	No	No	No	No	No	No	No	No	Yes	No	No	No	No	Yes	No	Yes	Yes	Yes
40	80044	Normal	65	60-74	6	0-6 years	Male	Married	< monthly minimum wage	labour	Rural	160	100	16.27	5	108	140	32	Hypertension	Underweight	Normal	Normal	High Risk	Smoking	Normal	Normal	2	1	10	Yes	No	No	No	Yes	No	No	No	No	Yes	Yes	No	Yes	No	No	Yes	No	Yes	Yes	Yes
41	80045	Normal	72	60-74	6	0-6 years	Female	Single	No Income	housewife	Rural	130	80	21	9	100	74	54	Normal	Normal	Normal	Normal	Normal	Not Smoking	Normal	Normal	2	2	8	Yes	No	No	No	No	Yes	No	No	No	No	Yes	No	Yes	No	No	Yes	No	Yes	Yes	Yes
42	80046	Dementia	81	>75	1	0-6 years	Female	Single	No Income	notworking	Rural	130	80	20.49	0	90	146	49	Normal	Normal	Normal	Normal	Normal	Not Smoking	Normal	Normal	2	3	2	Yes	No	No	No	No	No	No	No	No	No	No	No	No	No	No	No	No	No	No	No
43	80047	Normal	63	60-74	2	0-6 years	Female	Single	No Income	housewife	Rural	160	95	14.13	3	122	94	62	Hypertension	Underweight	Normal	Normal	Normal	Not Smoking	Normal	Normal	1	1	8	Yes	No	No	No	Yes	Yes	No	No	Yes	Yes	Yes	No	No	No	Yes	Yes	No	Yes	Yes	Yes
44	80048	Normal	68	60-74	6	0-6 years	Female	Married	No Income	housewife	Rural	110	59	13.78	1	159	53	44	Normal	Underweight	Diabetes	Normal	Normal	Not Smoking	Normal	Normal	4	0	9	Yes	No	No	No	No	No	No	No	No	No	Yes	No	No	No	No	Yes	No	Yes	Yes	Yes
45	80049	Normal	78	>75	2	0-6 years	Male	Married	< monthly minimum wage	labour	Rural	113	65	20.47	1				Normal	Normal				Smoking	Normal	Normal	2	3	7	Yes	No	No	No	Yes	No	No	No	Yes	Yes	No	No	Yes	No	Yes	Yes	No	Yes	Yes	Yes
46	80050	Normal	65	60-74	6	0-6 years	Female	Single	No Income	housewife	Rural	125	80	18.57	5	88	58	48	Normal	Normal	Normal	Normal	Normal	Not Smoking	Normal	Normal	2	3	7	Yes	No	No	No	Yes	No	No	No	Yes	No	Yes	No	Yes	No	No	Yes	No	Yes	No	Yes
47	80051	Dementia	60	60-74	3	0-6 years	Female	Married	No Income	housewife	Rural	110	70	20.54	7	65	130	44	Normal	Normal	Normal	Normal	Normal	Not Smoking	Normal	Normal	2	3	4	Yes	No	No	No	No	No	No	No	No	No	No	No	No	No	No	Yes	No	No	No	Yes
48	80054	Dementia	73	60-74	3	0-6 years	Female	Married	No Income	notworking	Rural	140	120	19.66	5	86	72	73	Hypertension	Normal	Normal	Normal	Normal	Not Smoking	Normal	Normal	2	2	4	No	No	No	No	No	No	No	No	No	No	Yes	No	Yes	No	No	Yes	No	Yes	No	Yes
49	80055	Normal	65	60-74	2	0-6 years	Female	Married	No Income	housewife	Rural	120	80	18.3	4	87	90	47	Normal	Underweight	Normal	Normal	Normal	Not Smoking	Normal	Normal	4	1	8	Yes	No	No	No	No	No	No	No	No	Yes	Yes	Yes	Yes	No	No	Yes	No	Yes	Yes	Yes
50	80056	Normal	73	60-74	5	0-6 years	Male	Married	No Income	notworking	Rural	138	88	20.05	1				Normal	Normal				Smoking	Normal	Normal	3	6	9	Yes	No	Yes	No	No	No	No	No	No	No	Yes	No	No	No	No	Yes	No	Yes	Yes	Yes
51	80057	Dementia	65	60-74	6	0-6 years	Male	Married	< monthly minimum wage	labour	Rural	170	100	21.67	1				Hypertension	Normal				Smoking	Normal	Normal	1	4	4	No	No	No	No	No	No	No	No	No	No	Yes	No	No	No	No	Yes	No	Yes	No	Yes
52	80058	Dementia	73	60-74	0	0-6 years	Female	Single	< monthly minimum wage	labour	Rural	120	80	23.23	4				Normal	Normal				Not Smoking	Normal	Normal	4	5	3	No	No	No	No	No	No	No	No	No	No	No	No	Yes	No	No	Yes	No	Yes	Yes	No
53	80059	Dementia	66	60-74	14	> 7 years	Male	Married	≥ monthly minimum wage	labour	Rural	150	110	21.16	4	88	80	60	Hypertension	Normal	Normal	Normal	Normal	Smoking	Normal	Normal	2	0	8	No	No	No	No	No	No	No	No	No	Yes	No	No	No	No	No	Yes	No	Yes	No	Yes
54	80060	Normal	60	60-74	6	0-6 years	Female				Rural	140	110	21.38	1	92	47	63	Hypertension	Normal	Normal	Normal	Normal		Normal	Normal	0	0	9	No	No	No	No	No	No	No	No	No	No	No	No	No	No	No	No	No	Yes	No	No
55	80061	Dementia	72	60-74	6	0-6 years	Male	Married	< monthly minimum wage	labour	Rural	140	85	23.1	2				Normal	Normal				Smoking	Normal	Normal	1	0		No	No	No	No	Yes	No	No	No	No	Yes	No	No	No	No	No	Yes	No	Yes	No	Yes
56	80062	Normal	67	60-74	6	0-6 years	Female	Married	No Income	housewife	Rural	145	80	20.97	3	89	170	76	Hypertension	Normal	Normal	Normal	Normal	Not Smoking	Normal	Normal	1	5		No	No	No	No	No	No	No	No	No	No	No	No	No	No	No	No	No	Yes	No	Yes
57	80065	Normal	79	>75	3	0-6 years	Male	Married	≥ monthly minimum wage	profesional	Rural	150	80	19.77	0				Hypertension	Normal				Smoking	Normal	Normal	0	0		Yes	No	No	No	No	No	No	No	No	No	Yes	No	No	No	No	Yes	No	Yes	No	Yes
58	80066	Normal	63	60-74	3	0-6 years	Female	Married	< monthly minimum wage	labour	Rural	150	80		0				Hypertension					Not Smoking	Normal	Normal	0	0	6	No	No	No	No	Yes	No	No	No	Yes	Yes	Yes	No	Yes	No	No	Yes	No	Yes	Yes	Yes
59	80067	Dementia	83	>75	0	0-6 years	Female	Single	< monthly minimum wage	labour	Rural	140	65	22.05	2	143	189	44	Normal	Normal	Diabetes	Normal	Normal	Not Smoking	Normal	Normal	3	2	5	No	No	No	No	No	No	No	No	Yes	Yes	Yes	No	Yes	No	No	Yes	No	Yes	Yes	Yes
60	80068	Normal	65	60-74	3	0-6 years	Male	Married	< monthly minimum wage	labour	Rural	130	70	12.42	2	124	109	43	Normal	Underweight	Normal	Normal	Normal	Smoking	Normal	Normal	4	7	8	No	No	No	No	No	No	No	No	No	No	No	No	Yes	No	No	No	No	No	No	No
61	80069	Normal	63	60-74	12	> 7 years	Male	Married	≥ monthly minimum wage	profesional	Rural	135	100	26.01	1				Hypertension	Overweight				Not Smoking	Normal	Normal	0	0	10	Yes	No	No	No	Yes	No	No	No	No	No	Yes	No	No	No	No	Yes	No	Yes	No	Yes
62	80070	Dementia	80	>75	0	0-6 years	Male	Married	< monthly minimum wage	labour	Rural	130	80	17.81	6				Normal	Underweight				Smoking	Normal	Normal	4	11	4	No	No	No	No	No	No	No	No	No	Yes	Yes	Yes	Yes	No	No	Yes	No	Yes	No	No
63	80071	Normal	72	60-74	3	0-6 years	Male	Married	< monthly minimum wage	labour	Rural	150	80	16.49	0				Hypertension	Underweight				Smoking	Normal	Normal	0	1	7	Yes	No	No	No	No	No	No	No	Yes	Yes	Yes	No	Yes	Yes	No	Yes	No	Yes	No	Yes
64	80072	Dementia	83	>75	0	0-6 years	Female	Single	No Income	notworking	Rural	140	100	20.72					Hypertension	Normal				Not Smoking	Normal		6	14	2	No	No	No	No	No	No	No	No	No	No	No	No	No	No	No	No	No	No	No	No
65	80073	Dementia	75	>75	2	0-6 years	Female	Single	< monthly minimum wage	labour	Rural	210	100	21.61	4	96	64	63	Hypertension	Normal	Normal	Normal	Normal	Not Smoking	Normal	Normal	6	5	7	Yes	No	No	No	No	No	No	No	No	No	No	No	No	No	No	Yes	No	No	No	No
66	80074	Dementia	73	60-74	0	0-6 years	Female	Single	No Income	housewife	Rural	140	100	19.48	8				Hypertension	Normal				Not Smoking	Normal	Normal	1	6	3	No	No	No	No	No	No	No	No	No	No	No	No	No	No	No	Yes	No	Yes	No	Yes
67	80075	Dementia	78	>75	0	0-6 years	Female	Single	No Income	notworking	Rural	130	80	16.02	5	91	66	62	Normal	Underweight	Normal	Normal	Normal	Not Smoking	Normal	Normal	2	0	3	No	No	No	No	No	No	No	No	No	No	No	No	No	No	No	Yes	No	No	No	No
68	80076	Dementia	80	>75	0	0-6 years	Female		No Income	housewife	Rural	190	100	19.04	10	84	96	60	Hypertension	Normal	Normal	Normal	Normal	Not Smoking	Normal	Depression	6	2	8	No	No	No	No	No	No	No	No	No	No	Yes	No	No	No	No	Yes	No	No	Yes	Yes
69	80077	Normal	65	60-74	3	0-6 years	Female	Single	No Income	housewife	Rural	130	70	20.92	0	91	55	46	Normal	Normal	Normal	Normal	Normal	Not Smoking	Normal	Normal	3	5	6	No	No	No	No	No	No	No	No	No	Yes	Yes	No	No	No	Yes	Yes	No	Yes	Yes	Yes
70	80078	Dementia	81	>75	0	0-6 years	Female	Single	No Income	notworking	Rural	130	100						Hypertension					Not Smoking	Normal		7	11	4	No	No	No	No	No	No	No	No	No	No	No	No	No	No	No	No	No	No	No	No
71	80079	Normal	63	60-74	6	0-6 years	Female	Single	≥ monthly minimum wage	profesional	Rural	164	100	24.44	0	111	95	77	Hypertension	Normal	Normal	Normal	Normal	Not Smoking	Normal	Normal	7	9		No	No	No	No	No	No	No	No	No	No	No	No	No	No	No	No	No	Yes	No	No
72	80080	Dementia	68	60-74	0	0-6 years	Male	Married	< monthly minimum wage	labour	Rural	120	80	21.1	5				Normal	Normal				Smoking	Normal	Normal	6	4	3	No	No	No	No	No	No	No	No	No	Yes	Yes	No	No	No	No	Yes	No	No	No	Yes
73	80081	Normal	65	60-74	4	0-6 years	Male	Married	< monthly minimum wage	labour	Rural	160	100	19.36	1				Hypertension	Normal				Smoking	Normal	Normal	0	2	8	No	No	No	No	No	No	No	No	No	No	Yes	No	No	No	No	Yes	No	Yes	No	Yes
74	80082	Normal	71	60-74	2	0-6 years	Female	Single	< monthly minimum wage	labour	Rural	130	80	16.06	6	120	209	43	Normal	Underweight	Normal	High Risk	Normal	Not Smoking	Normal	Normal	4	1	6	No	No	No	No	No	No	No	No	No	Yes	Yes	No	No	No	Yes	Yes	No	No	Yes	Yes
75	80083	Dementia	65	60-74	3	0-6 years	Female	Single	< monthly minimum wage	labour	Rural	150	120	28.23	4	99	78	74	Hypertension	Overweight	Normal	Normal	Normal	Not Smoking	Normal	Normal	1	1	5	No	No	No	No	No	No	No	No	No	No	Yes	No	Yes	No	Yes	Yes	No	Yes	No	Yes
76	80084	Dementia	76	>75	0	0-6 years	Female	Married	No Income	notworking	Rural	140	110		4	121	152	49	Hypertension		Normal	Normal	Normal	Not Smoking	Normal	Normal	5	9	6	No	No	No	No	No	No	No	No	No	No	No	No	Yes	No	No	Yes	No	Yes	No	Yes
77	80085	Dementia	63	60-74	4	0-6 years	Female	Single	< monthly minimum wage	labour	Rural	120	100	15.62	4				Hypertension	Underweight				Not Smoking	Normal	Normal	4	1	5	No	No	No	No	No	No	No	No	No	No	Yes	No	Yes	No	No	Yes	No	No	No	Yes
78	80086	Normal	60	60-74	11	> 7 years	Male	Married	< monthly minimum wage	labour	Rural	190	120	19.69	1				Hypertension	Normal				Smoking	Normal	Normal	0	0	10	Yes	No	No	No	No	Yes	No	No	No	No	Yes	No	Yes	No	No	No	No	No	Yes	Yes
79	80087	Dementia	78	>75	1	0-6 years	Female	Single	≥ monthly minimum wage	profesional	Rural	170	90	20.61	1	100	128	62	Hypertension	Normal	Normal	Normal	Normal	Not Smoking	Normal	Normal	0	0	5	No	No	No	No	No	No	No	No	No	No	No	No	No	No	No	Yes	No	No	No	Yes
80	80088	Normal	66	60-74	12	> 7 years	Female	Single	≥ monthly minimum wage	profesional	Rural	170	90	29.15	6				Hypertension	Overweight				Not Smoking	Normal	Normal	2	2	10	Yes	No	No	No	No	No	No	No	No	No	Yes	No	No	No	No	Yes	No	Yes	Yes	Yes
81	80089	Dementia	73	60-74	3	0-6 years	Female	Single	No Income	notworking	Rural	160	90	18.2	11				Hypertension	Underweight				Not Smoking	Normal	Depression	3	10	3	Yes	No	No	No	No	No	No	No	No	No	No	No	No	No	No	Yes	No	No	No	No
82	80090	Normal	82	>75	5	0-6 years	Male	Married	≥ monthly minimum wage	labour	Rural	140	90	18.01	11	87	66	52	Normal	Underweight	Normal	Normal	Normal	Smoking	Normal	Depression	3	8	9	Yes	No	No	No	No	No	No	No	Yes	Yes	No	No	No	No	No	Yes	No	Yes	No	No
83	80091	Normal	69	60-74	3	0-6 years	Female	Married	≥ monthly minimum wage	labour	Rural	190	90	19.61	1	91	145	49	Hypertension	Normal	Normal	Normal	Normal	Not Smoking	Normal	Normal	1	0	8	Yes	No	No	No	Yes	No	No	No	Yes	Yes	No	No	No	No	No	Yes	No	Yes	No	Yes
84	80092	Normal	64	60-74	5	0-6 years	Female	Single	No Income	notworking	Rural	120	70	23.37	2				Normal	Normal				Not Smoking	Normal	Normal	0	0	6	No	No	No	No	No	No	No	No	No	No	Yes	No	No	No	No	Yes	No	Yes	Yes	Yes
85	80094	Normal	61	60-74	4	0-6 years	Female	Married	No Income	housewife	Rural	130	70	21.28	0	134	119	36	Normal	Normal	Diabetes	Normal	High Risk	Not Smoking	Normal	Normal	0	1	6	Yes	No	No	Yes	Yes	Yes	No	No	Yes	No	Yes	No	No	No	Yes	Yes	No	Yes	Yes	Yes
86	80095	Dementia	65	60-74	3	0-6 years	Female	Single	≥ monthly minimum wage	profesional	Rural	130	80	19.21	4	309	198	28	Normal	Normal	Diabetes	Normal	High Risk	Not Smoking	Normal	Normal	2	9	3	No	No	No	Yes	No	Yes	No	No	No	No	Yes	No	No	No	No	Yes	No	Yes	Yes	No
87	80096	Dementia	68	60-74	2	0-6 years	Female	Single	No Income	notworking	Rural	140	70	18.21	1	80	58	52	Normal	Underweight	Normal	Normal	Normal	Not Smoking	Normal	Normal	4	1	3	Yes	No	No	No	No	No	No	No	No	No	No	No	No	No	No	Yes	No	Yes	No	Yes
88	80097	Normal	71	60-74	12	> 7 years	Male	Married	≥ monthly minimum wage	profesional	Rural	140	80	19.55	5				Normal	Normal				Not Smoking	Normal	Normal	1	2	9	Yes	No	No	No	Yes	Yes	Yes	No	No	Yes	Yes	Yes	Yes	Yes	No	Yes	No	Yes	Yes	Yes
89	80098	Dementia	73	60-74	0	0-6 years	Female	Single	No Income	notworking	Rural	150	90	16.8	8	84	87	80	Hypertension	Underweight	Normal	Normal	Normal	Not Smoking	Normal	Normal	1	4	2	No	No	No	No	No	No	No	No	No	No	No	No	No	No	No	No	No	Yes	Yes	No
90	80099	Normal	63	60-74	6	0-6 years	Female	Married	No Income	housewife	Rural	150	98	24.38	5				Hypertension	Normal				Not Smoking	Normal	Normal	1	1	7	No	No	No	No	No	No	No	No	No	Yes	No	No	Yes	No	No	Yes	No	Yes	Yes	Yes
91	80100	Normal	61	60-74	5	0-6 years	Male	Married	< monthly minimum wage	labour	Rural	140	90	16.4	2				Normal	Underweight				Smoking	Normal	Normal	0	0		Yes	No	No	No	Yes	No	No	No	No	No	Yes	No	Yes	No	No	Yes	No	Yes	Yes	No
92	80101	Normal	68	60-74	6	0-6 years	Female	Single	No Income	notworking	Rural	140	100	23.18	1				Hypertension	Normal				Not Smoking	Normal	Normal	2	0	9	Yes	No	No	No	No	No	No	No	No	Yes	Yes	No	No	No	No	Yes	No	Yes	Yes	Yes
93	80102	Normal	69	60-74	3	0-6 years	Female	Married	≥ monthly minimum wage	housewife	Rural	130	80	23.69	7	128	110	47	Normal	Normal	Diabetes	Normal	Normal	Not Smoking	Normal	Normal	3	3	6	No	No	No	Yes	Yes	No	No	No	Yes	No	Yes	No	Yes	No	No	Yes	No	No	Yes	Yes
94	80103	Normal	71	60-74	12	> 7 years	Male	Married	≥ monthly minimum wage	profesional	Rural			25.29	1	88	125	27		Overweight	Normal	Normal	High Risk	Smoking	Normal	Normal	3	3	10	Yes	No	No	No	Yes	Yes	No	No	Yes	No	Yes	No	Yes	No	Yes	Yes	No	Yes	Yes	Yes
95	80104	Dementia	75	>75	0	0-6 years	Female	Single	No Income	notworking	Rural				3	102	57	51			Normal	Normal	Normal	Not Smoking	Normal	Normal	8	7	1	Yes	No	No	No	No	No	No	No	No	No	No	No	No	No	No	Yes	No	No	No	Yes
96	80105	Normal	65	60-74	6	0-6 years	Male	Married	< monthly minimum wage	labour	Rural	158	78	18.26	0	77	53	52	Hypertension	Underweight	Normal	Normal	Normal	Smoking	Normal	Normal	0	0	9	Yes	No	No	No	No	No	No	No	No	No	Yes	No	Yes	No	No	Yes	No	Yes	No	Yes
97	80106	Dementia	65	60-74	2	0-6 years	Female	Married	No Income	housewife	Rural	166	110	22.59	1				Hypertension	Normal				Not Smoking	Normal	Normal	2	7	4	No	No	No	No	No	No	No	No	No	No	No	No	No	No	No	Yes	No	No	No	No
98	80107	Dementia	63	60-74	2	0-6 years	Male	Married	No Income	notworking	Rural	140	80	19.15	5	103	95	44	Normal	Normal	Normal	Normal	Normal	Smoking	Normal	Normal	2	2	5	Yes	No	No	No	No	No	No	No	No	Yes	Yes	No	No	No	No	Yes	No	Yes	No	Yes
99	80108	Normal	77	>75	1	0-6 years	Female	Married	No Income	housewife	Rural	120	80	18.02	1				Normal	Underweight				Not Smoking	Normal	Normal	3	0	7	Yes	No	No	No	No	No	No	No	No	No	No	No	No	No	No	Yes	No	No	No	No
100	80109	Normal	77	>75	4	0-6 years	Male	Married	< monthly minimum wage	labour	Rural	160	80	20.31	0				Hypertension	Normal				Smoking	Normal	Normal	2	0	9	Yes	No	No	No	Yes	No	No	No	No	No	Yes	No	No	No	No	Yes	No	Yes	No	No
101	80110	Normal	69	60-74	3	0-6 years	Male	Married	No Income	notworking	Rural	130	80	22.64	1				Normal	Normal				Not Smoking	Normal	Normal	4	3	6	No	No	No	No	No	No	No	No	No	No	No	No	No	No	No	Yes	No	Yes	No	No
102	80111	Dementia	60	60-74	3	0-6 years	Female	Married	No Income	housewife	Rural	140	80	21.03	1				Normal	Normal				Not Smoking	Normal	Normal	1	3	3	No	No	No	No	No	No	No	No	No	No	No	No	No	No	No	Yes	No	No	No	No
103	80112	Normal	70	60-74	5	0-6 years	Male	Married	No Income	notworking	Rural	160	90	24.22	1	111	77	48	Hypertension	Normal	Normal	Normal	Normal	Smoking	Normal	Normal	2	2	10	Yes	No	No	No	No	No	No	No	No	No	Yes	No	Yes	No	No	Yes	No	Yes	Yes	No
104	80113	Normal	61	60-74	6	0-6 years	Female	Married	No Income	housewife	Rural	136	80	19.52	3	87	53	77	Normal	Normal	Normal	Normal	Normal	Not Smoking	Normal	Normal	0	0	8	Yes	No	No	No	No	No	No	No	No	No	Yes	No	No	No	No	Yes	No	Yes	Yes	Yes
105	80114	Normal	71	60-74	16	> 7 years	Male	Married	< monthly minimum wage	profesional	Rural	160	80	24.19	1	123	61	54	Hypertension	Normal	Normal	Normal	Normal	Not Smoking	Normal	Normal	2	0	10	Yes	No	No	No	No	No	No	No	No	No	No	No	Yes	No	No	Yes	No	Yes	Yes	Yes
106	80115	Dementia	78	>75	0	0-6 years	Female	Single	No Income	notworking	Rural	160	100	25.15	0				Hypertension	Overweight				Not Smoking	Normal	Normal	3	0	3	No	No	No	No	No	No	No	No	No	Yes	No	No	No	No	No	Yes	No	Yes	No	No
107	80116	Dementia	66	60-74	2	0-6 years	Female	Married	No Income	notworking	Rural	110	70	19.52	6				Normal	Normal				Not Smoking	Normal	Normal	2	2	5	No	No	No	No	Yes	No	No	No	No	No	Yes	No	Yes	No	No	Yes	No	Yes	Yes	Yes
108	80117	Normal	68	60-74	4	0-6 years	Female	Married	No Income	housewife	Rural	130	80	17.3	0				Normal	Underweight					Normal	Normal	1	0	8	No	No	No	No	No	No	No	No	No	No	No	No	No	No	No	Yes	No	Yes	Yes	Yes
109	80118	Normal	63	60-74	6	0-6 years	Female	Married	< monthly minimum wage	profesional	Rural	132	72	18.94	2	107	101	53	Normal	Normal	Normal	Normal	Normal		Normal	Normal	1	0		No	No	No	No	No	No	No	No	No	No	No	No	No	No	No	Yes	No	Yes	No	Yes
110	80119	Normal	65	60-74	4	0-6 years	Male	Married	No Income	notworking	Rural	200	100	19.99	3	121	75	42	Hypertension	Normal	Normal	Normal	Normal	Smoking	Normal	Normal	1	3	9	Yes	No	No	No	Yes	Yes	No	No	Yes	No	Yes	No	Yes	No	Yes	Yes	No	Yes	Yes	Yes
111	80120	Dementia	82	>75	3	0-6 years	Female	Single	No Income	notworking	Rural	114	68	17.84	0	93	79	61	Normal	Underweight	Normal	Normal	Normal	Not Smoking	Normal	Normal	3	6	4	Yes	No	No	No	No	No	No	No	No	Yes	No	No	No	No	No	Yes	No	No	No	Yes
112	80121	Dementia	60	60-74	5	0-6 years	Male	Married	< monthly minimum wage	labour	Rural	180	100	19.69	2	161	64	35	Hypertension	Normal	Diabetes	Normal	High Risk	Smoking	Normal	Normal	2	4	5	Yes	No	No	No	No	No	No	No	Yes	Yes	Yes	No	Yes	No	No	Yes	No	Yes	Yes	No
113	80122	Normal	66	60-74	2	0-6 years	Female	Married	No Income	housewife	Rural	125	80	16.68	6	93	84	56	Normal	Underweight	Normal	Normal	Normal	Not Smoking	Normal	Normal	0	4	7	Yes	No	No	No	No	No	No	No	No	No	Yes	No	Yes	No	Yes	Yes	No	Yes	Yes	No
114	80123	Normal	68	60-74	6	0-6 years	Male	Married	< monthly minimum wage	labour	Rural	138	70	20.96	0	127	119	44	Normal	Normal	Diabetes	Normal	Normal	Smoking	Normal	Normal	1	1	8	Yes	No	No	No	Yes	Yes	No	No	Yes	Yes	Yes	No	Yes	No	Yes	Yes	No	Yes	Yes	No
115	80124	Dementia	76	>75	0	0-6 years	Male	Married	No Income	notworking	Rural	150	110	19.17	5				Hypertension	Normal				Smoking	Normal	Normal	4	12	4	No	No	No	No	No	No	No	No	No	No	Yes	No	Yes	No	No	Yes	No	Yes	No	No
116	80125	Dementia	69	60-74	9	> 7 years	Male	Married	No Income	notworking	Rural	146	90	25.64	3	87	122	45	Hypertension	Overweight	Normal	Normal	Normal	Smoking	Normal	Normal	1	6	8	Yes	No	No	No	Yes	Yes	No	No	No	No	Yes	No	Yes	No	No	Yes	No	Yes	No	No
117	80127	Normal	68	60-74	4	0-6 years	Female	Married	No Income	housewife	Rural	120	100		2				Hypertension					Not Smoking	Normal	Normal	4	0	9	Yes	No	No	No	No	Yes	No	No	No	No	No	No	No	No	No	Yes	No	Yes	Yes	Yes
118	80128	Normal	71	60-74	3	0-6 years	Male	Married	No Income	notworking	Rural	110	70	18.69	2	123	188	36	Normal	Normal	Normal	Normal	High Risk	Smoking	Normal	Normal	0	0	8	Yes	No	No	No	No	Yes	No	No	No	No	No	No	No	No	No	Yes	No	Yes	Yes	Yes
119	80129	Dementia	77	>75	2	0-6 years	Male	Single	< monthly minimum wage	labour	Rural	130	90	30.68	9				Normal	Obesitas				Smoking	Normal	Normal	3	5	4	Yes	No	No	No	No	No	No	No	No	Yes	Yes	No	No	No	No	Yes	No	No	No	No
120	80130	Normal	64	60-74	5	0-6 years	Male	Married	< monthly minimum wage	labour	Rural	120	80	20.17	5	107	177	36	Normal	Normal	Normal	Normal	High Risk	Smoking	Normal	Normal	2	5	7	No	No	No	No	Yes	No	No	No	No	No	Yes	No	No	No	No	No	Yes	Yes	Yes	No
121	80131	Normal	79	>75	3	0-6 years	Male	Married	< monthly minimum wage	labour	Rural	185	80	18.36	4	129	146	37	Hypertension	Underweight	Diabetes	Normal	High Risk	Smoking	Normal	Normal	1	2	6	No	No	No	No	Yes	No	No	No	Yes	Yes	Yes	No	Yes	No	No	Yes	No	Yes	Yes	Yes
122	80133	Normal	60	60-74	4	0-6 years	Male	Married	No Income	notworking	Rural	130	80	19.44	0				Normal	Normal				Smoking	Normal	Normal	0	0	7	Yes	No	No	No	No	No	No	No	No	No	Yes	No	Yes	No	No	Yes	No	Yes	Yes	Yes
123	80134	Dementia	71	60-74	5	0-6 years	Female	Married	No Income	housewife	Rural	150	80	20.35	4	121	176	51	Hypertension	Normal	Normal	Normal	Normal	Not Smoking	Normal	Normal	1	2	5	No	No	No	No	Yes	No	No	No	No	No	No	No	Yes	No	No	No	No	Yes	Yes	Yes
124	80135	Normal	65	60-74	4	0-6 years	Female	Married	No Income	housewife	Rural	150	80	19.28	0	107	122	53	Hypertension	Normal	Normal	Normal	Normal	Not Smoking	Normal	Normal	1	0	7	Yes	No	No	No	No	No	No	No	Yes	No	Yes	No	No	No	No	Yes	Yes	Yes	Yes	Yes
125	80136	Normal	75	>75	3	0-6 years	Male	Married	< monthly minimum wage	labour	Rural	120	80	18.47	0				Normal	Underweight				Smoking	Normal	Normal	1	2	8	Yes	No	No	No	Yes	Yes	No	No	No	No	Yes	No	Yes	No	Yes	Yes	No	Yes	Yes	Yes
126	80138	Normal	63	60-74	6	0-6 years	Male	Married			Rural	180	110	23.28	1				Hypertension	Normal				Smoking	Normal	Normal	3	0	8	Yes	No	No	No	Yes	No	No	No	No	No	Yes	No	Yes	No	No	Yes	No	Yes	No	Yes
127	80139	Normal	66	60-74	6	0-6 years	Male	Married	< monthly minimum wage	labour	Rural			19.21	3	78	101	54		Normal	Normal	Normal	Normal	Smoking	Normal	Normal	0	0	8	No	No	No	No	No	No	No	No	No	No	No	No	No	No	No	No	No	No	No	No
128	80140	Normal	63	60-74	6	0-6 years	Female	Married	No Income	housewife	Rural				4										Normal	Normal	0	0	9	No	No	No	No	No	No	No	No	No	No	Yes	No	Yes	No	No	Yes	No	Yes	Yes	No
129	80142	Dementia	73	60-74	1	0-6 years	Female	Single			Rural	160	70	17.65	3				Hypertension	Underweight					Normal	Normal	2	3	5	Yes	No	No	No	No	No	No	No	No	Yes	No	No	No	No	No	Yes	No	Yes	No	Yes
130	80143	Dementia	73	60-74	1	0-6 years	Female	Single			Rural	150	90	22.16	3				Hypertension	Normal					Normal	Normal	0		5	No	No	No	No	No	No	No	No	No	No	No	No	Yes	No	No	Yes	No	Yes	Yes	Yes
131	80144	Normal	84	>75	1	0-6 years	Female	Single			Rural	170	100	27.17	7				Hypertension	Overweight					Normal	Normal	4	5	6	No	No	No	No	No	No	No	No	No	No	No	No	Yes	No	No	Yes	No	No	Yes	No
132	80145	Normal	73	60-74	12	> 7 years	Male	Married			Rural			17.83	8	77	76	40		Underweight	Normal	Normal	Normal		Normal	Normal	1	0	9	Yes	No	No	No	Yes	Yes	No	No	No	Yes	Yes	No	Yes	No	No	Yes	No	Yes	No	Yes
133	80146	Normal	61	60-74	6	0-6 years	Female	Married			Rural			19.99	9					Normal					Normal	Normal	1	1	7	No	No	No	No	No	No	No	No	No	No	No	No	No	No	No	No	No	No	No	No
134	80147	Normal	85	>75	3	0-6 years	Male	Married			Rural	120	75	17.19	3	141	111	49	Normal	Underweight	Diabetes	Normal	Normal		Normal	Normal	1	0	7	No	No	No	No	No	No	No	No	No	No	Yes	No	Yes	No	Yes	Yes	No	Yes	No	Yes
135	80148	Dementia	73	60-74	3	0-6 years	Female	Married			Rural	150	130	17.57	3	85	90	47	Hypertension	Underweight	Normal	Normal	Normal		Normal	Normal	2	4	4	No	No	No	No	No	No	No	No	No	No	Yes	No	No	No	Yes	Yes	No	No	No	No
136	80149	Dementia	73	60-74	2	0-6 years	Female	Married			Rural	110	70	18.24	8				Normal	Underweight					Normal	Normal	6	4	3	No	No	No	No	No	No	No	No	No	No	No	No	No	No	No	Yes	No	Yes	No	Yes
137	80150	Normal	64	60-74	6	0-6 years	Male	Single			Rural	210	135	23.19	0	78	206	33	Hypertension	Normal	Normal	High Risk	High Risk		Normal	Normal	2	7	7	No	No	No	No	Yes	No	No	No	Yes	Yes	No	No	No	No	No	Yes	No	Yes	No	No
138	80151	Normal	72	60-74	4	0-6 years	Male	Married			Rural	130	80	21.85	5				Normal	Normal					Normal	Normal	0		7	No	No	No	No	No	No	No	No	No	No	Yes	No	Yes	No	No	Yes	No	Yes	Yes	No
139	80152	Dementia	61	60-74	5	0-6 years	Male	Married			Rural	160	100	19.69	5	115	79	46	Hypertension	Normal	Normal	Normal	Normal		Normal	Normal	0		5	No	No	No	No	No	No	No	No	Yes	No	Yes	No	Yes	No	No	Yes	No	Yes	Yes	No
140	80155	Normal	68	60-74	6	0-6 years	Male	Single			Rural	140	90	18.73	0				Normal	Normal					Normal	Normal	2	2	6	Yes	No	No	No	Yes	No	No	No	No	No	Yes	No	Yes	No	No	Yes	No	No	No	No
141	80157	Normal	78	>75	3	0-6 years	Female	Married	No Income	housewife	Rural	150	80	16.79	8	97	154	75	Hypertension	Underweight	Normal	Normal	Normal	Not Smoking	Normal	Normal	5	3	7	No	No	No	No	No	No	No	No	No	No	No	No	No	No	No	Yes	No	No	No	No
142	80158	Dementia	73	60-74	3	0-6 years	Female	Single	No Income	housewife	Rural	180	100		13	149	56	79	Hypertension		Diabetes	Normal	Normal	Not Smoking	Normal	Depression	0	1	3	No	No	No	No	No	No	No	No	No	No	No	No	No	No	No	No	No	Yes	No	Yes
143	80159	Dementia	78	>75	2	0-6 years	Female	Married			Rural	180	100		13				Hypertension						Normal	Depression	6	8	7	No	No	No	No	No	No	No	No	No	No	No	No	No	No	No	No	No	Yes	No	No
144	80160	Dementia	81	>75	0	0-6 years	Female	Single	No Income	housewife	Rural	180	110	21.31	6				Hypertension	Normal				Not Smoking	Normal	Normal	4	3	4	Yes	No	No	No	No	No	No	No	No	No	Yes	No	Yes	No	No	Yes	No	Yes	No	Yes
145	80161	Dementia	75	>75	0	0-6 years	Male	Married	< monthly minimum wage	labour	Rural	160	90	21.64	7				Hypertension	Normal				Smoking	Normal	Normal	4	1	4	No	No	No	No	No	No	No	No	No	No	Yes	No	Yes	No	No	Yes	No	Yes	Yes	No
146	80164	Normal	87	>75	5	0-6 years	Male	Married	No Income	notworking	Rural	168	82	21.71	7	87	68	54	Hypertension	Normal	Normal	Normal	Normal	Smoking	Normal	Normal	0		6	No	No	No	No	Yes	No	No	No	No	No	Yes	No	Yes	No	No	Yes	No	Yes	No	No
147	80166	Normal	65	60-74	6	0-6 years	Male	Married	≥ monthly minimum wage	profesional	Rural	130	90	20.25	0				Normal	Normal				Smoking	Normal	Normal	1	0	9	Yes	No	No	No	Yes	No	No	No	Yes	Yes	Yes	No	Yes	No	No	Yes	No	Yes	Yes	Yes
148	80167	Dementia	72	60-74	0	0-6 years	Male	Married	< monthly minimum wage	labour	Rural	126	78	17.84	10	82	127	36	Normal	Underweight	Normal	Normal	High Risk	Smoking	Normal	Depression	6	8	5	No	No	No	No	Yes	No	No	No	No	No	Yes	No	No	No	No	Yes	No	No	No	No
149	80169	Dementia	82	>75	5	0-6 years	Female	Single	No Income	notworking	Rural	131	91	18.33	3	82	77	52	Hypertension	Underweight	Normal	Normal	Normal	Not Smoking	Normal	Normal	4	4	5	No	No	No	No	No	No	No	No	Yes	No	Yes	No	Yes	No	No	Yes	No	Yes	Yes	No
150	80170	Dementia	86	>75	0	0-6 years	Female	Single	No Income	housewife	Rural	160	90	24.89	2				Hypertension	Normal				Not Smoking	Normal	Normal	2	1	4	No	No	No	No	No	No	No	No	No	No	No	No	Yes	No	No	No	No	Yes	No	Yes
151	80171	Normal	76	>75	3	0-6 years	Female	Single	No Income	housewife	Rural	134	68	20.7	1	128	109	55	Normal	Normal	Diabetes	Normal	Normal	Not Smoking	Normal	Normal	0	0	8	No	No	No	No	No	No	No	No	Yes	Yes	Yes	No	Yes	No	No	Yes	No	No	No	Yes
152	80172	Normal	86	>75	0	0-6 years	Male		No Income	notworking	Rural	140	70		6	93	125	48	Normal		Normal	Normal	Normal	Smoking	Normal	Normal	0	0	6	No	No	No	No	No	No	No	No	No	Yes	Yes	Yes	No	Yes	No	No	No	Yes	No	Yes
153	80173	Normal	66	60-74	2	0-6 years	Female	Single	< monthly minimum wage	profesional	Rural	120	75	18.74	0	93	192	43	Normal	Normal	Normal	Normal	Normal	Not Smoking	Normal	Normal	0	0	9	No	No	No	No	No	No	No	No	No	No	No	No	Yes	No	No	Yes	No	No	No	Yes
154	80174	Dementia	75	>75	0	0-6 years	Female	Single	No Income	housewife	Rural	160	100	20.16	5	105	145	58	Hypertension	Normal	Normal	Normal	Normal	Not Smoking	Normal	Normal	2	0	2	No	No	No	No	No	No	No	No	No	No	Yes	No	No	No	No	Yes	No	No	No	No
155	80175	Dementia	77	>75	1	0-6 years	Female		< monthly minimum wage	profesional	Rural	125	82	16.84	0				Normal	Underweight				Smoking	Normal	Normal	0	0	4	No	No	No	No	Yes	No	No	No	No	No	Yes	No	No	No	No	Yes	No	Yes	Yes	No
156	80176	Dementia	73	60-74	0	0-6 years	Female	Single	≥ monthly minimum wage	profesional	Rural	96	72	22.72	1	82	121	46	Normal	Normal	Normal	Normal	Normal	Not Smoking	Normal	Normal	3	4	5	Yes	No	No	No	No	No	No	No	No	No	No	No	Yes	No	No	Yes	No	Yes	No	No
157	80178	Dementia	76	>75	5	0-6 years	Female	Single	No Income	housewife	Rural	200	100	19.76	2				Hypertension	Normal				Smoking	Normal	Normal	4	5	4	No	No	No	No	No	No	No	No	No	No	Yes	No	No	No	No	Yes	No	Yes	No	Yes
158	80179	Dementia	65	60-74	12	> 7 years	Male	Single			Rural	140	90	18.83	3				Normal	Normal				Smoking	Normal	Normal	1	1	8	Yes	No	No	No	No	Yes	No	No	No	No	Yes	No	No	No	No	Yes	No	Yes	Yes	No
159	80180	Normal	74	60-74	2	0-6 years	Male	Married	< monthly minimum wage	labour	Rural	140	90	17.83	6				Normal	Underweight				Smoking	Normal	Normal	2	0	7	No	No	No	No	No	No	No	No	No	No	Yes	No	Yes	No	No	Yes	No	No	No	No
160	80181	Normal	65	60-74	6	0-6 years	Male	Single			Rural	170	90	20.29	6				Hypertension	Normal					Normal	Normal	1	5	8	Yes	No	No	No	Yes	Yes	No	No	No	Yes	Yes	No	Yes	No	No	Yes	No	Yes	Yes	Yes
161	80182	Normal	68	60-74	4	0-6 years	Male	Married	< monthly minimum wage	labour	Rural	130	90	20.45	4				Normal	Normal				Smoking	Normal	Normal	1	0	6	No	No	No	No	No	No	No	No	No	No	No	No	No	No	No	Yes	No	Yes	No	No
162	80183	Normal	75	>75	6	0-6 years	Male	Single			Rural	130	80	19.75	7				Normal	Normal				Not Smoking	Normal	Normal	2	4	8	Yes	No	No	No	Yes	Yes	No	No	Yes	No	No	No	Yes	No	No	Yes	No	Yes	No	No
163	80184	Normal	61	60-74	6	0-6 years	Male	Married	< monthly minimum wage	labour	Rural	110	72	17.68	0				Normal	Underweight				Smoking	Normal	Normal	1	2	9	Yes	No	No	No	Yes	No	No	No	Yes	Yes	Yes	No	Yes	No	No	Yes	No	Yes	Yes	Yes
164	80185	Normal	61	60-74	6	0-6 years	Female	Married	No Income	housewife	Rural	122	74	25.19	8	85	144	33	Normal	Overweight	Normal	Normal	High Risk	Not Smoking	Normal	Normal	1	1	10	No	No	No	No	No	No	No	No	Yes	Yes	Yes	No	Yes	No	No	Yes	No	Yes	Yes	Yes
165	80186	Normal	67	60-74	2	0-6 years	Male	Married	No Income	notworking	Rural	158	60	21.3	2	185	62	48	Hypertension	Normal	Diabetes	Normal	Normal	Smoking	Normal	Normal	0		6	No	No	No	No	Yes	No	No	No	Yes	Yes	Yes	No	Yes	No	No	Yes	No	Yes	Yes	Yes
166	80187	Normal	87	>75	1	0-6 years	Male	Married	< monthly minimum wage	labour	Rural	150	72	19.82	1	99	104	53	Hypertension	Normal	Normal	Normal	Normal	Smoking	Normal	Normal	0		7	No	No	No	No	Yes	No	No	No	No	Yes	No	No	No	No	No	Yes	No	Yes	No	No
167	80188	Dementia	65	60-74	1	0-6 years	Female	Married	No Income	housewife	Rural	150	90	20.78	0				Hypertension	Normal				Not Smoking	Normal	Normal	0	0	4	No	No	No	No	No	No	No	No	No	No	Yes	No	No	No	No	Yes	No	Yes	No	Yes
168	80189	Normal	67	60-74	6	0-6 years	Male				Rural	180	80	20.7	1	189	85	49	Hypertension	Normal	Diabetes	Normal	Normal	Not Smoking	Normal	Normal	0	0	9	Yes	No	No	No	No	No	No	No	No	No	Yes	No	Yes	No	No	Yes	No	Yes	Yes	Yes
169	80191	Dementia	68	60-74	6	0-6 years	Female				Rural	162	104	18.19	11	107	144	49	Hypertension	Underweight	Normal	Normal	Normal	Not Smoking	Normal	Depression	0	1	5	No	No	No	No	No	No	No	No	No	No	No	No	No	No	No	Yes	No	Yes	Yes	No
170	80192	Normal	90	>75	6	0-6 years	Male	Single	No Income	notworking	Rural	190	110	20.56					Hypertension	Normal				Smoking	Normal		7	17	10	No	No	No	No	No	Yes	No	No	No	No	No	No	No	No	No	No	No	No	Yes	No
171	80193	Normal	68	60-74	5	0-6 years	Female	Single	No Income	housewife	Rural	140	70	18.83	6				Normal	Normal				Not Smoking	Normal	Normal	2	2	6	Yes	No	No	No	No	No	No	No	No	No	Yes	No	No	No	No	Yes	No	Yes	No	Yes
172	80194	Normal	64	60-74	1	0-6 years	Male	Married	≥ monthly minimum wage	profesional	Rural	142	80	18.51	3				Hypertension	Normal				Smoking	Normal	Normal	0	2	10	No	No	No	No	No	No	No	No	Yes	Yes	Yes	No	No	No	No	Yes	No	Yes	Yes	No
173	80195	Dementia	69	60-74	3	0-6 years	Female	Married	No Income	housewife	Rural	140	90	16.9	4				Normal	Underweight				Not Smoking	Normal	Normal	0	0	3	No	No	No	No	No	No	No	No	No	No	Yes	No	No	No	No	Yes	No	Yes	No	Yes
174	80196	Normal	64	60-74	6	0-6 years	Male	Married	≥ monthly minimum wage	profesional	Rural	160	110	15.88	3	184	134	57	Hypertension	Underweight	Diabetes	Normal	Normal	Smoking	Normal	Normal	0	0	7	No	Yes	No	Yes	Yes	No	No	No	No	No	Yes	No	No	No	No	No	No	Yes	Yes	No
175	80197	Dementia	83	>75	1	0-6 years	Male	Married	< monthly minimum wage	profesional	Rural	140	100	16.43	1				Hypertension	Underweight				Smoking	Normal	Normal	0	0	3	No	No	No	No	Yes	No	No	No	No	Yes	Yes	No	Yes	No	No	Yes	No	Yes	No	No
176	80198	Normal	74	60-74	2	0-6 years	Female	Married	No Income	housewife	Rural	180	93	24.55	1	82	152	36	Hypertension	Normal	Normal	Normal	High Risk	Not Smoking	Normal	Normal	1	1	7	Yes	Yes	No	No	Yes	Yes	No	No	Yes	No	Yes	No	No	Yes	Yes	Yes	No	Yes	Yes	Yes
177	80199	Normal	74	60-74	6	0-6 years	Female	Single	No Income	housewife	Rural	150	90	14.92	6	82	94	37	Hypertension	Underweight	Normal	Normal	High Risk	Not Smoking	Normal	Normal	3	3	7	Yes	Yes	No	No	No	Yes	No	No	No	Yes	No	Yes	No	No	No	No	Yes	Yes	Yes	Yes
178	80200	Normal	68	60-74	3	0-6 years	Male	Married	< monthly minimum wage	profesional	Rural	100	70	19.8	0	92	56	40	Normal	Normal	Normal	Normal	Normal	Smoking	Normal	Normal	1	4	6	No	No	No	No	No	No	No	No	No	No	Yes	No	Yes	No	No	Yes	No	Yes	Yes	No
179	80201	Dementia	63	60-74	6	0-6 years	Female	Married	No Income	housewife	Rural	142	70	17.73	7				Hypertension	Underweight				Not Smoking	Normal	Normal	1	0	4	No	No	No	No	No	No	No	No	No	No	No	No	Yes	No	No	Yes	No	Yes	No	Yes
180	80202	Dementia	83	>75	1	0-6 years	Male	Married	< monthly minimum wage	profesional	Rural	140	90	19.39	5				Normal	Normal				Smoking	Normal	Normal	6	3	4	Yes	Yes	Yes	No	No	No	No	No	No	No	Yes	No	No	No	No	Yes	No	Yes	Yes	No
181	80203	Normal	62	60-74	6	0-6 years	Male	Married	≥ monthly minimum wage	profesional	Rural	110	70	18.58	8				Normal	Normal				Smoking	Normal	Normal	2	0	8	No	No	Yes	No	Yes	Yes	No	No	Yes	Yes	Yes	No	Yes	No	Yes	No	No	Yes	Yes	Yes
182	80204	Normal	73	60-74	4	0-6 years	Female	Married	No Income	housewife	Rural	130	90	19.08	0	82	70	59	Normal	Normal	Normal	Normal	Normal	Not Smoking	Normal	Normal	2	0	7	No	No	No	No	No	No	No	No	No	No	No	No	No	No	No	Yes	No	Yes	No	Yes
183	80205	Normal	74	60-74	6	0-6 years	Male	Married	< monthly minimum wage	profesional	Rural	110	70	19.48	3	77	57	90	Normal	Normal	Normal	Normal	Normal	Smoking	Normal	Normal	0	1		Yes	No	No	No	Yes	No	No	No	No	No	Yes	Yes	No	Yes	No	No	Yes	No	Yes	Yes
184	80206	Dementia	74	60-74	0	0-6 years	Female	Single	No Income	housewife	Rural	170	100	18.52	4	91	219	51	Hypertension	Normal	Normal	High Risk	Normal	Not Smoking	Normal	Normal	1	2	4	No	No	No	No	No	No	No	No	No	No	Yes	No	Yes	No	No	Yes	No	Yes	Yes	No
185	80207	Normal	66	60-74	6	0-6 years	Female	Married	No Income	housewife	Rural	140	90	17.56	2				Normal	Underweight					Normal	Normal	0	3	6	Yes	No	No	No	No	No	No	No	No	No	Yes	No	Yes	No	No	Yes	No	Yes	Yes	Yes
186	80208	Normal	69	60-74	6	0-6 years	Female	Single	No Income	notworking	Rural	118	70	18.01	5	103	93	72	Normal	Underweight	Normal	Normal	Normal	Not Smoking	Normal	Normal	5	1	6	No	No	No	No	No	No	No	No	Yes	No	Yes	No	Yes	No	No	Yes	No	Yes	Yes	Yes
187	80209	Normal	63	60-74	4	0-6 years	Female	Married	< monthly minimum wage	labour	Rural	160	90	12.09	0				Hypertension	Underweight				Smoking	Normal	Normal	0	0	7	Yes	No	No	No	Yes	No	No	No	No	No	Yes	No	No	No	No	Yes	No	No	No	No
188	80210	Dementia	73	60-74	6	0-6 years	Male	Married	≥ monthly minimum wage	profesional	Rural	180	100	20.59	2				Hypertension	Normal				Smoking	Normal	Normal	0	0	5	No	No	No	No	Yes	No	No	No	No	Yes	Yes	No	Yes	No	No	Yes	No	Yes	Yes	No
189	80212	Normal	76	>75	6	0-6 years	Male	Married	< monthly minimum wage	profesional	Rural	158	90	19.78	0				Hypertension	Normal				Smoking	Normal	Normal	0	0	8	No	No	No	No	Yes	Yes	No	No	No	No	Yes	No	No	No	No	Yes	No	Yes	Yes	Yes
190	80213	Normal	66	60-74	3	0-6 years	Female	Married	No Income	housewife	Rural	170	90	16.25	0				Hypertension	Underweight				Not Smoking	Normal	Normal	0	0	8	No	No	No	No	No	No	No	No	No	No	Yes	No	No	No	No	Yes	No	Yes	No	Yes
191	80214	Normal	62	60-74	6	0-6 years	Male	Married	≥ monthly minimum wage	profesional	Rural	168	90	19.7	4				Hypertension	Normal				Not Smoking	Normal	Normal	0	0	9	Yes	No	No	No	Yes	No	No	No	No	Yes	Yes	No	Yes	No	No	Yes	No	Yes	Yes	Yes
192	80215	Normal	68	60-74	6	0-6 years	Male	Married	< monthly minimum wage	profesional	Rural	152	78	21.83	0				Hypertension	Normal				Smoking	Normal	Normal	0	0	7	No	No	No	No	No	No	No	No	Yes	Yes	Yes	No	Yes	No	No	Yes	No	Yes	Yes	Yes
193	80216	Normal	69	60-74	3	0-6 years	Female	Single	No Income	housewife	Rural	150	90	18.94	6	89	143	35	Hypertension	Normal	Normal	Normal	High Risk	Not Smoking	Normal	Normal	1		7	No	No	No	No	No	No	No	No	No	No	No	No	No	No	No	Yes	No	No	No	Yes
194	80217	Dementia	78	>75	0	0-6 years	Female	Single	No Income	housewife	Rural	180	110	21.42	15	103	133	44	Hypertension	Normal	Normal	Normal	Normal	Not Smoking	Normal	Depression	1		3	No	No	No	No	No	No	No	No	No	No	No	No	No	No	No	No	No	Yes	Yes	No
195	80218	Normal	68	60-74	3	0-6 years	Female	Married	No Income	housewife	Rural	170	100	15.86	3				Hypertension	Underweight				Smoking	Normal	Normal	0			No	No	No	No	No	No	No	No	No	No	Yes	No	Yes	No	No	Yes	No	No	Yes	Yes
196	80219	Normal	80	>75	6	0-6 years	Male	Single			Rural	220	110	18.79	2	99	114	59	Hypertension	Normal	Normal	Normal	Normal		Normal	Normal	1	1	6	Yes	Yes	No	No	Yes	No	No	No	No	No	No	No	Yes	No	No	No	No	Yes	Yes	No
197	80220	Dementia	65	60-74	3	0-6 years	Female	Single	No Income	notworking	Rural	150	100	20.34	1				Hypertension	Normal					Normal	Normal	0	2		No	No	No	No	No	No	No	No	No	No	Yes	No	Yes	No	No	Yes	No	Yes	No	Yes
198	80221	Normal	63	60-74	6	0-6 years	Female	Single	No Income	housewife	Rural	150	90	19.27	8	109	192	39	Hypertension	Normal	Normal	Normal	High Risk	Not Smoking	Normal	Normal	0	0	9	Yes	No	No	No	No	No	No	No	No	No	Yes	No	No	No	No	Yes	No	Yes	No	Yes
199	80223	Normal	71	60-74	6	0-6 years	Male	Married	< monthly minimum wage	profesional	Rural	160	90	28.68	6				Hypertension	Overweight				Smoking	Normal	Normal	2	2	10	Yes	No	No	No	No	No	No	No	No	No	Yes	No	No	No	No	Yes	No	Yes	No	No
200	80224	Dementia	73	60-74	6	0-6 years	Female	Single	No Income	housewife	Rural	130	70	15.56	9				Normal	Underweight				Not Smoking	Normal	Normal	8	0	5	No	No	No	No	No	No	No	No	No	No	No	No	No	No	No	Yes	No	Yes	Yes	Yes
201	80226	Dementia	82	>75	6	0-6 years	Male	Married	≥ monthly minimum wage	labour	Rural	160	98	21.27	5	129	153	33	Hypertension	Normal	Diabetes	Normal	High Risk	Smoking	Normal	Normal	8	13	5	No	No	No	No	No	No	No	No	No	No	Yes	No	No	No	No	Yes	No	No	No	No
202	80227	Normal	63	60-74	3	0-6 years	Male	Married	≥ monthly minimum wage	labour	Rural	230	130	21.94	3				Hypertension	Normal				Smoking	Normal	Normal	0	0	7	No	No	No	No	No	No	No	No	No	Yes	Yes	No	Yes	No	No	Yes	No	Yes	Yes	Yes
203	80228	Dementia	75	>75	3	0-6 years	Female	Married	≥ monthly minimum wage	housewife	Rural	140	90	22.66	1	120	111	57	Normal	Normal	Normal	Normal	Normal		Normal	Normal	2	1	4	No	No	No	No	No	No	No	No	No	No	Yes	No	No	No	No	Yes	No	No	No	Yes
204	80229	Normal	67	60-74	2	0-6 years	Female	Single	≥ monthly minimum wage	notworking	Rural	170	90	20.59	0	91	57	39	Hypertension	Normal	Normal	Normal	High Risk		Normal	Normal	1	1	6	No	No	No	No	No	No	No	No	No	No	No	No	No	No	No	Yes	No	Yes	No	No
205	80230	Dementia	77	>75	0	0-6 years	Female	Single	≥ monthly minimum wage	notworking	Rural	210	85	17.3	6	214	74	52	Hypertension	Underweight	Diabetes	Normal	Normal		Normal	Normal	3	6	4	No	No	No	No	No	No	No	No	No	Yes	No	No	No	No	No	No	No	No	No	No
206	80231	Dementia	63	60-74	2	0-6 years	Male	Married	≥ monthly minimum wage	labour	Rural	210	110	16.36	7				Hypertension	Underweight				Smoking	Normal	Normal	4	1	5	No	No	No	No	No	No	No	No	No	No	No	No	No	No	No	Yes	No	Yes	No	No
207	80232	Normal	69	60-74	11	> 7 years	Male	Married	< monthly minimum wage	profesional	Rural	160	80	17.99	0				Hypertension	Underweight				Smoking	Normal	Normal	0	0	9	No	No	No	No	Yes	Yes	No	No	Yes	Yes	No	No	No	No	No	Yes	No	Yes	No	No
208	80233	Normal	77	>75	2	0-6 years	Male	Married	< monthly minimum wage	profesional	Rural	130	80	16.15	1				Normal	Underweight				Smoking	Normal	Normal	0	0	8	Yes	No	No	No	No	No	No	No	No	Yes	Yes	No	No	No	No	Yes	No	No	No	No
209	80234	Normal	63	60-74	6	0-6 years	Female	Married	≥ monthly minimum wage	profesional	Rural	130	90	19.09	2				Normal	Normal					Normal	Normal	2	0	7	No	No	No	No	No	No	No	No	No	Yes	Yes	No	Yes	No	Yes	Yes	No	Yes	Yes	Yes
210	80235	Normal	60	60-74	10	> 7 years	Female	Married	< monthly minimum wage		Rural	150	100	24.85	3	84	98	60	Hypertension	Normal	Normal	Normal	Normal		Normal	Normal	0	0	10	Yes	No	No	No	No	No	No	No	No	Yes	Yes	No	Yes	No	No	Yes	No	Yes	Yes	Yes
211	80236	Normal	62	60-74	12	> 7 years	Male	Married	< monthly minimum wage	profesional	Rural	140	80	20.17	0				Normal	Normal				Smoking	Normal	Normal	0	0	10	Yes	No	Yes	No	No	No	Yes	No	No	No	No	No	No	No	Yes	Yes	No	Yes	Yes	Yes
212	80237	Normal	82	>75	3	0-6 years	Female	Single	≥ monthly minimum wage	notworking	Rural	140	90	18.74	5	74	80	46	Normal	Normal	Normal	Normal	Normal		Normal	Normal	1	1	6	No	No	No	No	No	No	No	No	No	Yes	No	No	No	No	No	Yes	No	Yes	Yes	Yes
213	80238	Dementia	83	>75	2	0-6 years	Female	Single	≥ monthly minimum wage		Rural	160	110	13.19	5	112	128	55	Hypertension	Underweight	Normal	Normal	Normal		Normal	Normal	4	3	3	No	No	No	No	No	No	No	No	No	Yes	No	No	No	No	No	Yes	No	Yes	No	Yes
214	80239	Dementia	85	>75	2	0-6 years	Female	Single	≥ monthly minimum wage	notworking	Rural	160	90		2				Hypertension						Normal	Normal	7	9	2	No	No	No	No	No	No	No	No	No	No	No	No	No	No	No	No	No	No	No	Yes
215	80240	Normal	63	60-74	3	0-6 years	Male	Married	≥ monthly minimum wage	labour	Rural	150	100	23.15	1	116	126	43	Hypertension	Normal	Normal	Normal	Normal	Smoking	Normal	Normal	2	3	7	Yes	No	No	No	Yes	No	No	No	No	No	Yes	No	No	No	No	Yes	No	Yes	Yes	No
216	80241	Normal	82	>75	4	0-6 years	Male	Married	≥ monthly minimum wage	profesional	Rural	140	84	18.48	2	150	114	32	Normal	Underweight	Diabetes	Normal	High Risk	Smoking	Normal	Normal	0	9	8	Yes	No	No	No	Yes	No	No	No	No	Yes	Yes	No	Yes	No	No	Yes	No	Yes	No	No
217	80242	Normal	82	>75	3	0-6 years	Male	Married	≥ monthly minimum wage	labour	Rural	170	80	20.08	3	102	72	37	Hypertension	Normal	Normal	Normal	High Risk	Smoking	Normal	Normal	1	1	7	Yes	No	No	No	Yes	Yes	No	No	No	Yes	Yes	No	Yes	No	No	Yes	No	Yes	Yes	Yes
218	80243	Normal	64	60-74	0	0-6 years	Female	Single	≥ monthly minimum wage	notworking	Rural	180	102	23.2	2				Hypertension	Normal					Normal	Normal	0	0	7	No	No	No	No	No	No	No	No	No	No	No	No	No	No	No	Yes	No	Yes	No	Yes
219	80244	Normal	69	60-74	2	0-6 years	Female	Single	≥ monthly minimum wage		Rural	140	80	15.58	4				Normal	Underweight					Normal	Normal	3	3	8	Yes	No	No	No	No	No	No	No	No	No	Yes	No	No	No	No	Yes	No	Yes	Yes	Yes
220	80245	Normal	72	60-74	6	0-6 years	Male	Married	≥ monthly minimum wage	profesional	Rural	170	110	26.81	4				Hypertension	Overweight					Normal	Normal	0	0	9	Yes	No	No	No	Yes	No	No	No	No	No	Yes	No	Yes	No	No	Yes	No	Yes	Yes	Yes
221	80246	Normal	62	60-74	0	0-6 years	Male	Married	< monthly minimum wage	profesional	Rural	160	120	23.6	1	73	113	36	Hypertension	Normal	Normal	Normal	High Risk	Smoking	Normal	Normal	3	6	7	Yes	No	No	No	Yes	No	No	No	Yes	No	Yes	No	Yes	No	No	Yes	No	Yes	Yes	Yes
222	80247	Normal	66	60-74	1	0-6 years	Female	Married	≥ monthly minimum wage	housewife	Rural	130	90	18.44	3	92	77	43	Normal	Underweight	Normal	Normal	Normal		Normal	Normal	2	1	8	Yes	No	No	No	Yes	Yes	No	No	No	No	Yes	No	Yes	No	No	Yes	No	Yes	No	Yes
223	80248	Normal	72	60-74	2	0-6 years	Female	Single	≥ monthly minimum wage	profesional	Rural	170	100	19.62	10				Hypertension	Normal					Normal	Depression	1	3	7	Yes	No	No	No	No	No	No	No	No	No	Yes	No	No	No	No	Yes	No	Yes	No	Yes
224	80249	Normal	67	60-74	4	0-6 years	Male	Married	≥ monthly minimum wage	labour	Rural	160	85	21.26	1				Hypertension	Normal				Smoking	Normal	Normal	1	5	7	No	No	No	No	No	No	No	No	No	Yes	Yes	No	Yes	No	Yes	Yes	No	No	Yes	No
225	80250	Dementia	66	60-74	2	0-6 years	Female	Single	≥ monthly minimum wage	profesional	Rural	120	80	16.88	10	80	106	68	Normal	Underweight	Normal	Normal	Normal		Normal	Depression	3	1	7	Yes	No	No	No	No	No	No	No	No	No	Yes	No	Yes	No	Yes	Yes	No	Yes	No	Yes
226	80251	Normal	72	60-74	2	0-6 years	Female	Single	≥ monthly minimum wage	notworking	Rural	154	78	17.1	6	82	78	65	Hypertension	Underweight	Normal	Normal	Normal		Normal	Normal	0	0	6	Yes	No	No	No	Yes	No	No	No	No	No	Yes	No	No	No	No	Yes	No	No	No	Yes
227	80252	Dementia	72	60-74	0	0-6 years	Female	Single	≥ monthly minimum wage	notworking	Rural	170	95	21.84	1	96	78	65	Hypertension	Normal	Normal	Normal	Normal		Normal	Normal	6	16	2	No	No	No	No	No	No	No	No	No	No	No	No	No	No	No	No	No	Yes	No	No
228	80253	Dementia	81	>75	3	0-6 years	Female	Single	≥ monthly minimum wage	notworking	Rural	160	80	18.71	5	84	106	67	Hypertension	Normal	Normal	Normal	Normal		Normal	Normal	3	1	6	Yes	No	No	No	Yes	Yes	No	No	No	No	No	No	Yes	No	Yes	Yes	No	No	No	Yes
229	80255	Normal	72	60-74	6	0-6 years	Male	Married	≥ monthly minimum wage	labour	Rural	200	100	18.05	2				Hypertension	Underweight				Smoking	Normal	Normal	1	0	9	Yes	No	No	No	No	No	No	No	No	No	Yes	No	Yes	No	No	Yes	No	Yes	No	Yes
230	80256	Normal	63	60-74	3	0-6 years	Female	Single	≥ monthly minimum wage	notworking	Rural	130	88	17.92	1				Normal	Underweight					Normal	Normal	3	0	9	No	No	No	No	No	No	No	No	No	No	Yes	No	No	No	No	Yes	No	Yes	No	Yes
231	80258	Normal	75	>75	0	0-6 years	Male	Married	< monthly minimum wage	labour	Rural	140	80	24.28	0				Normal	Normal				Smoking	Normal	Normal	0	2	8	No	No	No	No	Yes	No	No	No	No	Yes	Yes	No	Yes	No	No	Yes	No	Yes	Yes	Yes
232	80260	Normal	68	60-74	3	0-6 years	Male	Married	< monthly minimum wage	profesional	Rural	135	85	19.36	0	208	98	41	Normal	Normal	Diabetes	Normal	Normal		Normal	Normal	0	4	7	Yes	No	No	No	Yes	No	No	No	No	No	Yes	No	Yes	Yes	No	Yes	No	Yes	Yes	Yes
233	80261	Normal	65	60-74	3	0-6 years	Male	Married	< monthly minimum wage	labour	Rural	140	90	19.11	4	189	71	53	Normal	Normal	Diabetes	Normal	Normal	Smoking	Normal	Normal	3	7		Yes	No	No	No	Yes	No	No	No	Yes	No	Yes	No	Yes	No	No	Yes	No	Yes	Yes	Yes
234	80262	Normal	61	60-74	5	0-6 years	Male	Married	< monthly minimum wage	labour	Rural	140	70	19.08	2	121	53	62	Normal	Normal	Normal	Normal	Normal	Smoking	Normal	Normal	1	0		Yes	No	No	No	Yes	Yes	No	No	No	Yes	Yes	No	Yes	No	No	Yes	No	Yes	Yes	Yes
235	80263	Normal	75	>75	1	0-6 years	Male	Married	< monthly minimum wage	labour	Rural	122	88	20.79	4				Normal	Normal				Not Smoking	Normal	Normal	2	8	6	No	No	No	No	No	No	No	No	No	No	Yes	No	Yes	No	No	Yes	No	Yes	Yes	No
236	80264	Normal	65	60-74	6	0-6 years	Male	Married	< monthly minimum wage	labour	Rural	150	94	20	5	83	113	47	Hypertension	Normal	Normal	Normal	Normal	Smoking	Normal	Normal	1	8	10	Yes	No	No	No	No	No	No	No	No	No	No	No	Yes	No	No	Yes	No	Yes	Yes	No
237	80265	Normal	90	>75	0	0-6 years	Female	Married	No Income	housewife	Rural	145	95	18.58	1				Hypertension	Normal				Not Smoking	Normal	Normal	0	2	5	Yes	No	No	No	No	No	No	No	No	No	Yes	No	Yes	No	Yes	Yes	No	No	Yes	Yes
238	80266	Normal	88	>75	3	0-6 years	Male	Married	No Income	notworking	Rural	200	95	15.86	8	55	73	53	Hypertension	Underweight	Normal	Normal	Normal	Smoking	Normal	Normal	5	11	6	No	No	No	No	No	No	No	No	No	No	No	No	No	No	No	No	No	Yes	No	No
239	80267	Dementia	63	60-74	3	0-6 years	Male	Married	< monthly minimum wage	profesional	Rural	140	94		8	116	86	35	Hypertension		Normal	Normal	High Risk	Not Smoking	Normal	Normal	2	3	4	No	No	No	No	No	No	No	No	No	No	No	No	Yes	No	No	Yes	No	No	No	Yes
240	80268	Dementia	63	60-74	0	0-6 years	Female	Single	No Income	notworking	Rural	130	80	13.97	6	92	59	60	Normal	Underweight	Normal	Normal	Normal		Normal	Normal	2	3	5	Yes	No	No	No	Yes	No	No	No	No	Yes	Yes	No	Yes	No	Yes	Yes	No	Yes	Yes	Yes
241	80269	Dementia	70	60-74	4	0-6 years	Female	Married	No Income	housewife	Rural	120	80	25.35	0	80	76	66	Normal	Overweight	Normal	Normal	Normal	Not Smoking	Normal	Normal	3	1	5	No	No	No	No	No	No	No	No	No	Yes	Yes	No	Yes	No	No	Yes	No	Yes	Yes	Yes
242	80271	Dementia	69	60-74	6	0-6 years	Male	Married	< monthly minimum wage	profesional	Rural	195	90	20.31	9	128	56	45	Hypertension	Normal	Diabetes	Normal	Normal	Not Smoking	Normal	Normal	3	4	5	Yes	No	No	Yes	Yes	No	No	No	Yes	No	Yes	No	Yes	No	No	Yes	No	Yes	Yes	No
243	80272	Dementia	78	>75	1	0-6 years	Female	Married	No Income	housewife	Rural	160	95	18.38	6	82	118	68	Hypertension	Underweight	Normal	Normal	Normal		Normal	Normal	3	3	4	No	No	No	No	No	No	No	No	No	Yes	Yes	No	No	No	No	Yes	No	Yes	Yes	Yes
244	80273	Normal	60	60-74	7	> 7 years	Female	Married	No Income	notworking	Rural	140	90	25.5	2	92	87	59	Normal	Overweight	Normal	Normal	Normal	Not Smoking	Normal	Normal	0	1	10	Yes	No	No	No	No	Yes	No	No	No	No	No	No	No	No	No	Yes	No	Yes	Yes	Yes
245	80274	Normal	69	60-74	6	0-6 years	Female	Married	No Income	housewife	Rural	120	70	24.27	4	95	106	40	Normal	Normal	Normal	Normal	Normal	Not Smoking	Normal	Normal	2	0	7	Yes	No	No	No	No	No	No	No	No	No	Yes	No	No	No	Yes	Yes	No	Yes	No	Yes
246	80275	Dementia	65	60-74	3	0-6 years	Male	Married			Rural	130	90	18.72	6	93	106	40	Normal	Normal	Normal	Normal	Normal	Not Smoking	Normal	Normal	0	2	4	No	No	No	No	No	No	No	No	No	No	Yes	No	Yes	No	No	Yes	No	Yes	Yes	No
247	80276	Normal	74	60-74	0	0-6 years	Male	Married	< monthly minimum wage	labour	Rural	155	95	19.08	4	105	65	36	Hypertension	Normal	Normal	Normal	High Risk	Smoking	Normal	Normal	1	6	6	No	No	No	No	No	No	No	No	No	No	Yes	No	No	No	No	Yes	No	Yes	Yes	Yes
248	80277	Normal	68	60-74	0	0-6 years	Female	Married	No Income	housewife	Rural	180	110	19.94	1	101	90	51	Hypertension	Normal	Normal	Normal	Normal	Not Smoking	Normal	Normal	1	2	6	No	No	No	No	No	No	No	No	No	No	Yes	No	Yes	No	No	Yes	No	Yes	Yes	Yes
249	80278	Dementia	80	>75	0	0-6 years	Female	Single	No Income	housewife	Rural	170	100		1	138	186	48	Hypertension		Diabetes	Normal	Normal	Not Smoking	Normal	Normal	3	4	5	No	No	No	No	No	No	No	No	No	Yes	No	No	No	No	No	Yes	No	Yes	No	Yes
250	80280	Normal	68	60-74	2	0-6 years	Female	Married	No Income	housewife	Rural			18.82	5	105	184	37		Normal	Normal	Normal	High Risk	Not Smoking	Normal	Normal	0	1	6	Yes	No	No	No	Yes	No	No	No	No	Yes	Yes	No	Yes	No	No	Yes	No	Yes	Yes	Yes
251	80281	Normal	66	60-74	5	0-6 years	Female	Married	No Income	housewife	Rural	140	84	19.56	7	91	64	67	Normal	Normal	Normal	Normal	Normal	Smoking	Normal	Normal	0	2	7	No	No	No	No	No	No	No	No	No	No	Yes	No	No	No	No	Yes	No	Yes	No	No
252	80282	Normal	73	60-74	6	0-6 years	Male	Single	< monthly minimum wage	labour	Rural	140	68		7	81	120	40	Normal		Normal	Normal	Normal	Smoking	Normal	Normal	1	1	8	No	No	No	No	No	No	No	No	No	No	Yes	No	Yes	No	No	Yes	No	Yes	No	Yes
253	80283	Dementia	71	60-74	2	0-6 years	Male		No Income	notworking	Rural	160	92	22.53	9				Hypertension	Normal				Smoking	Normal	Normal	3	1	5	Yes	No	No	No	No	No	No	No	No	No	Yes	No	Yes	No	Yes	Yes	No	Yes	Yes	Yes
254	80284	Dementia	66	60-74	2	0-6 years	Female	Married	No Income	notworking	Rural	170	90	25.46	1	90	121	49	Hypertension	Overweight	Normal	Normal	Normal	Not Smoking	Normal	Normal	0	0	4	No	No	No	No	No	No	No	No	No	No	Yes	No	No	No	No	Yes	No	No	No	Yes
255	80285	Dementia	73	60-74	6	0-6 years	Male	Married	No Income	notworking	Rural	100	70	18.57	6	112	111	42	Normal	Normal	Normal	Normal	Normal	Smoking	Normal	Normal	0	0	5	Yes	No	No	No	No	No	No	No	Yes	No	Yes	No	Yes	No	No	Yes	No	No	No	No
256	80287	Normal	66	60-74	6	0-6 years	Female	Single	No Income	housewife	Rural	188	110	24.47	1	88	66	44	Hypertension	Normal	Normal	Normal	Normal	Not Smoking	Normal	Normal	1	0	9	Yes	No	No	No	Yes	No	No	No	No	No	No	No	Yes	No	No	Yes	No	Yes	Yes	Yes
257	80289	Dementia	83	>75	0	0-6 years	Female	Married	No Income	housewife	Rural	150	90	20.4	6	96	55	57	Hypertension	Normal	Normal	Normal	Normal	Not Smoking	Normal	Normal	5	2	4	No	No	No	No	No	No	No	No	No	No	No	No	No	No	No	Yes	No	Yes	Yes	Yes
258	80290	Normal	90	>75	4	0-6 years	Male	Married	No Income	notworking	Rural	170	88	17.46	8	134	117	31	Hypertension	Underweight	Diabetes	Normal	High Risk	Smoking	Normal	Normal	1	0	6	No	No	No	No	No	No	No	No	No	No	Yes	No	Yes	No	No	No	Yes	Yes	Yes	Yes
259	80291	Dementia	60	60-74	3	0-6 years	Female				Rural	154	90	25.16	4				Hypertension	Overweight					Normal	Normal	0	0	5	No	No	No	No	No	No	No	No	No	No	Yes	No	Yes	No	No	No	No	No	No	Yes
260	80292	Dementia	73	60-74	4	0-6 years	Female				Rural	224	102	27.62	1	147	166	41	Hypertension	Overweight	Diabetes	Normal	Normal		Normal	Normal	0	2	5	No	No	No	No	No	No	No	No	No	No	Yes	No	Yes	No	No	Yes	No	Yes	Yes	Yes
261	80293	Normal	61	60-74	4	0-6 years	Female	Single	No Income	housewife	Rural	162	90	27.77	2	82	36	112	Hypertension	Overweight	Normal	Normal	Normal	Not Smoking	Normal	Normal	0	1	7	No	No	No	No	No	No	No	No	No	Yes	Yes	No	Yes	No	No	Yes	No	Yes	Yes	Yes
262	80294	Normal	83	>75	6	0-6 years	Female				Rural	114	62	17.36	4	89	86	66	Normal	Underweight	Normal	Normal	Normal		Normal	Normal	3	1	7	No	No	No	No	No	No	No	No	No	Yes	Yes	No	Yes	No	No	Yes	No	No	No	Yes
263	80295	Dementia	83	>75	0	0-6 years	Female				Rural	190	100	18.65	1	97	140	54	Hypertension	Normal	Normal	Normal	Normal		Normal	Normal	0		5	No	No	No	No	Yes	No	No	No	No	No	Yes	No	Yes	No	No	Yes	No	Yes	Yes	Yes
264	80296	Normal	78	>75	3	0-6 years	Male				Rural	238	74	19.82	5				Hypertension	Normal					Normal	Normal	0		6	Yes	No	No	No	Yes	Yes	No	No	No	No	Yes	Yes	Yes	No	No	Yes	No	Yes	Yes	Yes
265	80297	Normal	63	60-74	0	0-6 years	Female				Rural				4	73	116	46			Normal	Normal	Normal		Normal	Normal	0	1	6	No	No	No	No	No	No	No	No	No	No	No	No	No	No	No	Yes	No	No	No	No
266	80298	Normal	65	60-74	6	0-6 years	Male	Married			Rural	140	100	26.81	6				Hypertension	Overweight					Normal	Normal	2	0	9	Yes	No	No	No	No	No	No	No	No	No	Yes	No	Yes	No	No	Yes	No	Yes	Yes	Yes
267	80300	Dementia	70	60-74	4	0-6 years	Female				Rural	210	110	15.11	10	97	140	61	Hypertension	Underweight	Normal	Normal	Normal		stroke	Depression	7	27	2	No	No	No	No	No	No	No	No	No	No	No	No	No	No	No	Yes	No	Yes	No	No
268	80301	Normal	69	60-74	6	0-6 years	Male	Married	< monthly minimum wage	profesional	Rural	150	90	25.09	0				Hypertension	Overweight				Smoking	Normal	Normal	0	0	10	Yes	No	No	No	Yes	No	No	No	No	No	Yes	No	No	No	No	Yes	Yes	No	Yes	Yes
269	80302	Normal	65	60-74	6	0-6 years	Male	Married	≥ monthly minimum wage	profesional	Rural	120	80	23.23	0				Normal	Normal				Smoking	Normal	Normal	0	0	9	Yes	No	No	No	No	No	No	No	No	No	Yes	No	No	No	No	Yes	No	Yes	No	No
270	80303	Normal	78	>75	2	0-6 years	Female				Rural	128	70		0	79	81	49	Normal		Normal	Normal	Normal		Normal	Normal	0		7	Yes	No	No	No	No	No	No	No	No	No	Yes	No	Yes	No	No	Yes	No	Yes	Yes	Yes
271	80304	Dementia	83	>75	3	0-6 years	Female				Rural	130	90	18.33	7				Normal	Underweight					Normal	Normal	5	1	3	No	No	No	No	No	No	No	No	No	No	No	No	No	No	No	Yes	No	No	Yes	Yes
272	80305	Dementia	64	60-74	2	0-6 years	Male				Rural	130	62	20.9	6				Normal	Normal					Normal	Normal	6	1	4	No	No	No	Yes	Yes	No	No	No	No	Yes	Yes	No	Yes	No	No	Yes	No	Yes	No	No
273	80306	Dementia	88	>75	3	0-6 years	Female	Single	No Income	notworking	Rural	168	80	14.42	0	88	60	64	Hypertension	Underweight	Normal	Normal	Normal	Not Smoking	Normal	Normal	3	2	4	No	No	No	No	No	No	No	No	No	No	Yes	No	No	No	No	Yes	No	No	No	No
274	80307	Dementia	82	>75	6	0-6 years	Female	Single	No Income	housewife	Rural	182	80	18.64	4	98	60	77	Hypertension	Normal	Normal	Normal	Normal	Not Smoking	Normal	Normal	0	0	2	No	No	No	No	No	No	No	No	No	No	No	No	Yes	No	No	Yes	No	Yes	Yes	Yes
275	80308	Dementia	78	>75	3	0-6 years	Female	Single	< monthly minimum wage		Rural	210	114	17.47	5	84	73	64	Hypertension	Underweight	Normal	Normal	Normal	Not Smoking	Normal	Normal	3	1	5	No	No	No	No	Yes	No	No	No	No	Yes	No	No	Yes	No	No	Yes	No	Yes	No	Yes
276	80309	Normal	63	60-74	6	0-6 years	Male	Married	< monthly minimum wage	profesional	Rural	165	90	21.15	0				Hypertension	Normal				Smoking	Normal	Normal	0	0	10	Yes	No	No	No	No	No	No	No	No	No	Yes	No	No	No	No	Yes	No	Yes	No	Yes
277	80310	Dementia	72	60-74	0	0-6 years	Female	Single	No Income	notworking	Rural	140	80	17.26	5				Normal	Underweight				Not Smoking	stroke	Normal	6	14	2	No	No	No	No	No	No	No	No	No	No	No	No	No	No	No	No	No	Yes	No	No
278	80311	Normal	64	60-74	3	0-6 years	Female	Single	No Income	housewife	Rural	160	90	19.11	8	93	67	66	Hypertension	Normal	Normal	Normal	Normal	Not Smoking	Normal	Normal	4	0	7	No	No	No	No	No	No	No	No	No	No	No	No	No	No	No	Yes	No	Yes	No	Yes
279	80312	Normal	67	60-74	5	0-6 years	Male	Married	< monthly minimum wage	profesional	Rural	120	80	19.23	0				Normal	Normal				Smoking	Normal	Normal	0	0	10	No	No	No	No	No	No	No	No	No	Yes	Yes	No	No	No	No	Yes	No	Yes	No	Yes
280	80313	Dementia	87	>75	5	0-6 years	Female				Sub-Urban	170	84	18.04	1				Hypertension	Underweight					Normal	Normal	2	3	5	No	No	No	No	No	No	No	No	No	No	No	No	Yes	No	No	Yes	No	Yes	Yes	Yes
281	80316	Normal	73	60-74	6	0-6 years	Male	Single	No Income	notworking	Sub-Urban	168	82	20.6	6	85	195	33	Hypertension	Normal	Normal	Normal	High Risk	Smoking	Normal	Normal	2	4	6	No	No	No	No	No	No	No	No	No	No	No	No	No	No	No	Yes	No	Yes	No	Yes
282	80318	Normal	68	60-74	6	> 7 years	Female	Married	No Income	notworking	Sub-Urban	200	100	18.28	4	107	102	62	Hypertension	Underweight	Normal	Normal	Normal	Not Smoking	Normal	Normal	3	3	7	No	No	No	No	Yes	No	No	No	No	Yes	Yes	No	Yes	No	No	Yes	No	Yes	Yes	Yes
283	80319	Dementia	60	60-74	11	> 7 years	Male	Married	≥ monthly minimum wage	profesional	Sub-Urban	180	88	21.56	2				Hypertension	Normal				Smoking	Normal	Normal	1	1	7	Yes	No	No	No	Yes	Yes	No	No	No	No	Yes	No	No	No	No	Yes	No	Yes	No	No
284	80320	Dementia	64	60-74	9	0-6 years	Male	Married	< monthly minimum wage	labour	Sub-Urban	200	110	24.26	3	130	144	45	Hypertension	Normal	Diabetes	Normal	Normal	Not Smoking	Normal	Normal	3	0	7	Yes	No	No	No	No	No	No	No	No	No	Yes	No	Yes	No	No	Yes	No	Yes	No	Yes
285	80321	Normal	64	60-74	6	> 7 years	Female				Sub-Urban	170	110	34.25	3				Hypertension	Obesitas					Normal	Normal	0	1	6	No	No	No	No	Yes	No	No	No	No	No	No	No	Yes	No	Yes	Yes	No	Yes	Yes	Yes
286	80322	Normal	62	60-74	12	0-6 years	Female	Single	No Income	notworking	Sub-Urban	120	70	23.73	4	159	279	42	Normal	Normal	Diabetes	High Risk	Normal		Normal	Normal	6	2	10	Yes	No	No	No	Yes	No	No	No	No	No	No	No	Yes	No	No	Yes	No	Yes	No	Yes
287	80324	Normal			6	0-6 years	Female				Sub-Urban	226	130	28.2	5				Hypertension	Overweight					Normal	Normal	6	2	9	No	No	No	No	No	No	No	No	No	No	Yes	No	Yes	No	No	Yes	No	Yes	No	Yes
288	80325	Dementia	71	60-74	6	0-6 years	Male	Married	≥ monthly minimum wage	profesional	Sub-Urban	172	100	19.31		82	127	37	Hypertension	Normal	Normal	Normal	High Risk		Normal		0	11	0	No	No	No	No	No	No	No	No	No	No	No	No	No	No	No	No	No	Yes	No	No
289	80326	Dementia	63	60-74	6	0-6 years	Female	Single	No Income	notworking	Sub-Urban	130	90	20.04	9	92	105	45	Normal	Normal	Normal	Normal	Normal	Smoking	Normal	Normal	3	0	5	No	No	No	No	Yes	No	No	No	No	No	Yes	No	No	No	No	No	No	No	No	Yes
290	80327	Normal	68	60-74	0	0-6 years	Female	Single	No Income	notworking	Sub-Urban	180	90	21.01	3				Hypertension	Normal				Not Smoking	Normal	Normal	4	2	6	No	No	No	No	No	No	No	No	No	No	No	No	Yes	No	No	Yes	No	Yes	Yes	Yes
291	80328	Normal	63	60-74	6	0-6 years	Female	Single	≥ monthly minimum wage	profesional	Sub-Urban	150	100	22.49	7				Hypertension	Normal				Smoking	Normal	Normal	1	0	7	No	No	Yes	No	Yes	No	No	No	Yes	No	Yes	No	Yes	No	No	Yes	No	Yes	No	Yes
292	80329	Normal	60	60-74	5	> 7 years	Female		No Income	housewife	Sub-Urban	150	100	33.58	2				Hypertension	Obesitas				Not Smoking	Normal	Normal	2	1	9	Yes	No	No	No	No	No	No	No	No	No	No	No	Yes	No	Yes	Yes	No	Yes	Yes	Yes
293	80330	Normal	73	60-74	6	0-6 years	Male	Married	≥ monthly minimum wage	profesional	Sub-Urban	130	90	20.16	5				Normal	Normal				Smoking	Normal	Normal	1	0	8	Yes	No	Yes	No	No	No	No	No	No	Yes	Yes	No	No	No	No	Yes	No	Yes	Yes	Yes
294	80331	Normal	61	60-74	9	0-6 years	Male	Married	≥ monthly minimum wage	profesional	Sub-Urban	130	90	20.15	4	92	150	52	Normal	Normal	Normal	Normal	Normal		Normal	Normal	2	0	10	Yes	Yes	Yes	No	Yes	No	No	No	No	Yes	Yes	No	Yes	Yes	No	Yes	No	Yes	Yes	Yes
295	80332	Normal	64	60-74	6	> 7 years	Female	Married	No Income	housewife	Sub-Urban	128	77	25.05	5				Normal	Overweight				Not Smoking	Normal	Normal	0	0	9	No	No	No	No	No	No	No	No	No	No	Yes	No	Yes	No	No	Yes	No	Yes	Yes	Yes
296	80333	Normal	66	60-74	6	> 7 years	Female	Married	≥ monthly minimum wage	profesional	Sub-Urban	130	80	23.03	1				Normal	Normal				Smoking	Normal	Normal	0	0	10	Yes	No	No	No	No	No	No	No	No	No	Yes	No	No	No	Yes	Yes	No	Yes	Yes	No
297	80334	Normal	62	60-74	8	0-6 years	Male	Married	≥ monthly minimum wage	profesional	Sub-Urban	190	110	26.21	2	107	137	81	Hypertension	Overweight	Normal	Normal	Normal	Smoking	Normal	Normal	0	0	9	No	No	No	No	No	Yes	No	No	No	No	Yes	No	No	No	No	Yes	No	Yes	Yes	No
298	80335	Normal	61	60-74	12	0-6 years	Male				Sub-Urban	130	90	22.86	2				Normal	Normal					Normal	Normal	1	0	9	Yes	No	No	No	Yes	Yes	No	No	No	No	Yes	No	No	No	No	Yes	No	Yes	No	Yes
299	80336	Normal	60	60-74	6	0-6 years	Female	Married	No Income	housewife	Sub-Urban	128	80	31.28	5	121	185	49	Normal	Obesitas	Normal	Normal	Normal	Not Smoking	Normal	Normal	2	0	7	Yes	No	No	No	Yes	Yes	No	No	No	Yes	Yes	No	Yes	No	No	Yes	No	Yes	Yes	Yes
300	80337	Normal	76	>75	3	0-6 years	Female				Sub-Urban	140	78	16.61	7				Hypertension	Underweight					Normal	Normal	0	2	8	Yes	No	No	No	Yes	No	No	No	No	No	No	No	Yes	No	No	Yes	No	Yes	No	Yes
301	80338	Dementia	61	60-74	5	0-6 years	Female	Married	No Income	housewife	Sub-Urban	110	70	44.89	7				Normal	Obesitas					Normal	Normal	4	2	4	No	No	No	No	No	Yes	No	No	No	Yes	No	No	No	No	No	Yes	No	Yes	Yes	Yes
302	80339	Dementia			0	> 7 years	Female				Sub-Urban	121	80	19.67	6				Normal	Normal					Normal	Normal	2	3	5	No	No	No	No	No	No	No	No	No	No	No	No	Yes	No	No	No	No	Yes	No	Yes
303	80340	Normal	63	60-74	5	0-6 years	Female	Married	≥ monthly minimum wage	profesional	Sub-Urban	170	110	22.56	2	75	152	45	Hypertension	Normal	Normal	Normal	Normal		Normal	Normal	2	1	9	Yes	No	No	No	No	No	No	No	No	Yes	Yes	No	No	No	No	Yes	No	Yes	Yes	Yes
304	80341	Normal	70	60-74	6	0-6 years	Male	Married	No Income	notworking	Sub-Urban				10	133	121	32			Diabetes	Normal	High Risk		Normal	Depression	4	11	9	Yes	No	No	No	Yes	No	No	No	No	No	No	Yes	No	No	No	No	No	Yes	Yes	No
305	80342	Normal	62	60-74	6	0-6 years	Male	Married	No Income	notworking	Sub-Urban	168	90	24.8	2				Hypertension	Normal				Smoking	Normal	Normal	0	1	8	Yes	No	No	No	Yes	No	No	No	No	No	Yes	No	Yes	No	No	Yes	No	Yes	Yes	Yes
306	80345	Normal	62	60-74	9	0-6 years	Female	Married			Sub-Urban	130	90	19.11	2	87	74	59	Normal	Normal	Normal	Normal	Normal		Normal	Normal	0	0	9	Yes	No	No	No	No	Yes	No	No	No	No	Yes	No	No	No	No	Yes	No	Yes	Yes	Yes
307	80346	Dementia	62	60-74	12	> 7 years	Male	Married	≥ monthly minimum wage	profesional	Sub-Urban	190	110	22.21	1				Hypertension	Normal				Smoking	Normal	Normal	0	0	8	Yes	No	No	No	Yes	Yes	No	No	No	No	Yes	No	Yes	No	No	Yes	No	Yes	Yes	Yes
308	80347	Normal	69	60-74	6	0-6 years	Female	Married			Sub-Urban	160	80	27.63	2	89	152	55	Hypertension	Overweight	Normal	Normal	Normal		Normal	Normal	3	2	9	No	No	No	No	No	No	No	No	No	No	No	No	Yes	No	No	No	No	Yes	No	Yes
309	80348	Dementia			3	0-6 years	Female				Sub-Urban	182	80	21.27	1				Hypertension	Normal					Normal	Normal	5	12	5	Yes	No	No	No	No	No	No	No	No	No	No	No	Yes	No	No	No	No	Yes	Yes	Yes
310	80350	Normal	68	60-74	5	0-6 years	Female	Single	≥ monthly minimum wage	notworking	Sub-Urban	140	80	44.14	1				Normal	Obesitas				Not Smoking	Normal	Normal	0	1	10	Yes	No	No	No	No	No	No	No	No	No	No	No	Yes	No	No	No	No	Yes	Yes	No
311	80351	Normal	68	60-74	6	0-6 years	Female	Married	No Income	housewife	Sub-Urban	157	98	21.26	4				Hypertension	Normal					Normal	Normal	0	0	9	Yes	No	No	No	Yes	No	No	No	No	No	Yes	No	Yes	No	No	Yes	No	Yes	No	Yes
312	80352	Normal	65	60-74	6	0-6 years	Male	Married	≥ monthly minimum wage	profesional	Sub-Urban	160	96	21.68	2				Hypertension	Normal					Normal	Normal	0	0	9	Yes	No	No	No	No	No	No	No	No	No	No	No	Yes	No	No	Yes	No	Yes	No	No
313	80353	Normal	61	60-74	6	0-6 years	Female	Married	No Income	housewife	Sub-Urban	190	90	21.72	3				Hypertension	Normal				Not Smoking	Normal	Normal	1	0	9	Yes	No	No	No	Yes	No	No	No	No	Yes	Yes	No	Yes	No	No	Yes	No	Yes	No	Yes
314	80354	Normal	72	60-74	6	0-6 years	Female	Single	≥ monthly minimum wage	labour	Sub-Urban	160	90	27.23	1				Hypertension	Overweight				Not Smoking	Normal	Normal	0	3	8	Yes	No	No	No	No	No	No	No	No	Yes	No	No	Yes	No	No	Yes	No	Yes	No	No
315	80355	Normal	74	60-74	9	> 7 years	Female	Single	≥ monthly minimum wage		Sub-Urban	140	110	27.41	5	96	154	65	Hypertension	Overweight	Normal	Normal	Normal	Not Smoking	Normal	Normal	4	5	9	Yes	No	No	No	No	No	No	No	No	No	Yes	No	No	No	No	No	No	Yes	No	Yes
316	80356	Normal	64	60-74	6	0-6 years	Female	Single	No Income	notworking	Sub-Urban	170	95	20.37	4	95	46	79	Hypertension	Normal	Normal	Normal	Normal	Not Smoking	Normal	Normal	0	1	8	No	No	No	No	No	No	No	No	No	No	No	No	No	No	No	Yes	No	Yes	Yes	Yes
317	80357	Normal	71	60-74	3	0-6 years	Female	Single	< monthly minimum wage	profesional	Sub-Urban	182	110	28.24	3				Hypertension	Overweight				Not Smoking	Normal	Normal	0	3	9	No	No	No	No	Yes	No	No	No	Yes	Yes	Yes	No	Yes	No	No	Yes	No	Yes	Yes	Yes
318	80358	Normal	73	60-74	6	0-6 years	Male	Married	≥ monthly minimum wage	labour	Sub-Urban	122	74	20.2	1	75	76	52	Normal	Normal	Normal	Normal	Normal	Smoking	Normal	Normal	0	4	9	No	No	No	No	Yes	No	No	No	Yes	Yes	Yes	No	Yes	No	No	No	No	Yes	Yes	Yes
319	80359	Normal	68	60-74	4	0-6 years	Female	Married	≥ monthly minimum wage	housewife	Sub-Urban	130	80	22.93	0	122	86	51	Normal	Normal	Normal	Normal	Normal	Not Smoking	Normal	Normal	0	2	9	No	No	No	No	No	No	No	No	Yes	Yes	No	No	Yes	No	No	No	No	Yes	Yes	Yes
320	80360	Dementia	69	60-74	11	> 7 years	Male	Married	No Income	notworking	Sub-Urban	138	100	21.93	3	94	148	46	Hypertension	Normal	Normal	Normal	Normal		Normal	Normal	2	0	8	Yes	No	Yes	No	Yes	Yes	Yes	No	No	No	Yes	No	Yes	No	Yes	Yes	No	Yes	Yes	Yes
321	80361	Normal	60	60-74	6	0-6 years	Female	Married	≥ monthly minimum wage	housewife	Sub-Urban	170	94		3				Hypertension					Not Smoking	Normal	Normal	0	1	9	No	No	No	No	No	No	No	No	No	Yes	No	No	Yes	No	No	No	No	Yes	Yes	No
322	80362	Dementia	61	60-74	2	0-6 years	Female	Married	No Income	housewife	Sub-Urban	160	100	22.8	12				Hypertension	Normal					Normal	Depression	7	12	6	No	No	No	No	No	No	No	No	No	No	No	No	Yes	No	No	No	No	Yes	No	No
323	80363	Normal	68	60-74	6	0-6 years	Female	Married	≥ monthly minimum wage		Sub-Urban	166	90	23.13	2				Hypertension	Normal					Normal	Normal	0	0	8	Yes	No	No	No	Yes	No	No	No	Yes	Yes	Yes	No	No	Yes	No	Yes	No	Yes	Yes	Yes
324	80364	Normal	60	60-74	6	0-6 years	Female	Married	No Income	notworking	Sub-Urban	150	90	22.19	3	86	108	48	Hypertension	Normal	Normal	Normal	Normal	Not Smoking	Normal	Normal	0	0	8	No	No	No	No	No	No	No	No	No	No	Yes	No	No	No	No	No	No	Yes	Yes	Yes
325	80365	Normal	73	60-74	6	0-6 years	Male	Married	≥ monthly minimum wage	labour	Sub-Urban	140	60	19.69	5	92	143	60	Normal	Normal	Normal	Normal	Normal	Smoking	Normal	Normal	0	0	9	No	No	No	No	No	No	No	No	No	No	No	No	No	No	No	No	No	No	No	No
326	80366	Normal	65	60-74	3	0-6 years	Male	Single	≥ monthly minimum wage		Sub-Urban	230	110	26.65	4				Hypertension	Overweight					Normal	Normal	8	2	6	No	No	No	No	No	No	No	No	No	No	No	No	No	No	No	Yes	No	Yes	No	No
327	80367	Normal	81	>75	1	0-6 years	Male	Single	No Income	notworking	Sub-Urban	130	100	28.52	13				Hypertension	Overweight				Smoking	Normal	Depression	4	6	7	No	No	No	No	No	No	No	No	No	No	No	No	No	No	No	No	No	Yes	Yes	No
328	80368	Normal	63	60-74	6	0-6 years	Female	Single	No Income	notworking	Sub-Urban	140	100	28.85	4	88	116	48	Hypertension	Overweight	Normal	Normal	Normal	Not Smoking	Normal	Normal	3	0	10	Yes	No	No	No	Yes	No	No	No	No	No	Yes	No	No	No	No	Yes	No	Yes	Yes	Yes
329	80369	Normal	68	60-74	6	0-6 years	Male	Married	No Income	notworking	Sub-Urban	130	80	17.96	2	117	76	58	Normal	Underweight	Normal	Normal	Normal	Smoking	Normal	Normal	2	0	7	No	No	No	No	Yes	No	No	No	No	No	Yes	No	Yes	No	No	Yes	No	Yes	Yes	Yes
330	80370	Normal	63	60-74	6	0-6 years	Female	Married	No Income	housewife	Sub-Urban	150	90	19.1	13	112	77	50	Hypertension	Normal	Normal	Normal	Normal	Not Smoking	Normal	Depression	4	0	6	No	No	No	No	Yes	No	No	No	No	No	No	No	No	No	No	Yes	No	Yes	No	Yes
331	80371	Normal	62	60-74	4	0-6 years	Female	Single	≥ monthly minimum wage	profesional	Sub-Urban	180	110	26	3	88	92	61	Hypertension	Overweight	Normal	Normal	Normal	Not Smoking	Normal	Normal	2	2	7	No	No	No	No	Yes	No	No	No	No	No	No	No	No	No	No	No	No	Yes	No	Yes
332	80372	Normal	73	60-74	6	0-6 years	Male	Married	No Income	notworking	Sub-Urban	180	90	19.95	7	84	106	49	Hypertension	Normal	Normal	Normal	Normal	Not Smoking	Normal	Normal	1	0	10	No	No	No	No	Yes	Yes	No	No	No	No	Yes	No	No	No	No	No	No	Yes	Yes	Yes
333	80373	Normal	66	60-74	3	0-6 years	Female	Single	No Income	notworking	Sub-Urban	140	115	20.88	7	97	108	54	Hypertension	Normal	Normal	Normal	Normal		Normal	Normal	0	4	8	No	No	No	No	Yes	No	No	No	No	No	Yes	Yes	No	No	Yes	No	Yes	Yes	Yes	No
334	80374	Normal	62	60-74	6	0-6 years	Male	Married	≥ monthly minimum wage	labour	Sub-Urban	200	100	25.08	1				Hypertension	Overweight					Normal	Normal	1	0	9	Yes	No	No	No	Yes	Yes	No	No	No	No	Yes	No	Yes	No	No	Yes	No	Yes	Yes	No
335	80375	Normal	73	60-74	16	> 7 years	Female	Married	≥ monthly minimum wage	profesional	Sub-Urban	140	80	22.64	4				Normal	Normal				Not Smoking	Normal	Normal	3	1	10	Yes	No	No	No	No	No	No	No	No	Yes	Yes	No	No	No	No	Yes	No	Yes	Yes	Yes
336	80376	Normal	76	>75	16	> 7 years	Male	Married	≥ monthly minimum wage	profesional	Sub-Urban	150	80	21.22	3				Hypertension	Normal					Normal	Normal	4	6	9	Yes	No	No	No	No	No	No	No	No	No	No	No	No	No	No	Yes	No	Yes	Yes	No
337	80377	Dementia	73	60-74	8	> 7 years	Male	Married	≥ monthly minimum wage	labour	Sub-Urban	130	70	20.62	6	92	94	44	Normal	Normal	Normal	Normal	Normal		Normal	Normal	0	0	6	No	No	No	No	Yes	No	No	No	Yes	No	Yes	No	Yes	No	No	Yes	No	Yes	Yes	No
338	80378	Dementia	77	>75	3	0-6 years	Female	Single	No Income	notworking	Sub-Urban	140	90	21.3	4				Normal	Normal				Not Smoking	Normal	Normal	3	2	5	Yes	No	No	No	No	No	No	No	No	No	No	No	No	No	No	Yes	No	Yes	Yes	No
339	80379	Normal	88	>75	6	0-6 years	Male	Married	≥ monthly minimum wage	labour	Sub-Urban	120	80	17.26	2				Normal	Underweight					Normal	Normal	0	14	7	Yes	No	No	Yes	No	Yes	No	No	No	No	Yes	No	No	No	Yes	Yes	No	Yes	Yes	Yes
340	80380	Normal	64	60-74	6	0-6 years	Female	Married	No Income	housewife	Sub-Urban	160	90	23.83	1	91	149	53	Hypertension	Normal	Normal	Normal	Normal		Normal	Normal	1	1	10	Yes	No	No	No	Yes	No	No	No	No	Yes	Yes	No	Yes	No	No	Yes	No	Yes	Yes	Yes
341	80381	Normal	78	>75	3	0-6 years	Male	Married	≥ monthly minimum wage	labour	Sub-Urban	120	100	18.48	0	125	86	37	Hypertension	Underweight	Normal	Normal	High Risk	Smoking	Normal	Normal	0	6	10	No	No	No	No	No	No	No	No	No	No	No	No	No	No	No	No	No	Yes	Yes	No
342	80382	Normal	60	60-74	6	0-6 years	Female	Married	No Income	housewife	Sub-Urban	160	82	26.22	6				Hypertension	Overweight				Not Smoking	Normal	Normal	2	6	8	No	No	No	No	No	No	No	No	No	No	Yes	No	Yes	No	Yes	No	No	Yes	Yes	No
343	80383	Normal	67	60-74	9	> 7 years	Male	Married	< monthly minimum wage	profesional	Sub-Urban	220	112	16.85	2				Hypertension	Underweight				Smoking	Normal	Normal	0	3	10	No	No	No	No	Yes	No	No	No	No	No	Yes	No	Yes	No	No	No	No	No	Yes	No
344	80384	Normal	61	60-74	6	0-6 years	Female	Married	No Income	housewife	Sub-Urban	150	100	28.77	2	78	140	63	Hypertension	Overweight	Normal	Normal	Normal	Not Smoking	Normal	Normal	0	0	7	Yes	No	No	No	No	Yes	No	No	No	Yes	Yes	No	Yes	No	No	No	No	Yes	Yes	Yes
345	80385	Normal	78	>75	2	0-6 years	Female	Married	No Income	notworking	Sub-Urban	180	90	26	1				Hypertension	Overweight				Not Smoking	Normal	Normal	0	1	6	Yes	No	No	Yes	No	No	No	No	No	No	Yes	No	Yes	No	No	Yes	No	No	No	Yes
346	80386	Normal	64	60-74	6	0-6 years	Male	Married	< monthly minimum wage	labour	Sub-Urban	150	100	20.5	1				Hypertension	Normal				Not Smoking	Normal	Normal	0	0	8	No	No	No	No	Yes	No	No	No	No	No	Yes	Yes	Yes	No	No	Yes	No	Yes	Yes	Yes
347	80387	Dementia	71	60-74	2	0-6 years	Female	Single	No Income	notworking	Sub-Urban	150	110		4				Hypertension					Not Smoking	Normal	Normal	2	6	5	No	No	No	No	No	No	No	No	No	No	No	No	No	No	No	No	No	Yes	No	No
348	80388	Normal	60	60-74	6	0-6 years	Male	Married	< monthly minimum wage	profesional	Sub-Urban	120	80	26.56	1				Normal	Overweight				Not Smoking	Normal	Normal	0	0	10	Yes	No	No	No	Yes	Yes	No	No	No	No	Yes	No	Yes	No	No	Yes	No	Yes	No	Yes
349	80389	Normal	87	>75	5	0-6 years	Male	Married	No Income	notworking	Sub-Urban	160	90	19.33	2	109	157	69	Hypertension	Normal	Normal	Normal	Normal	Smoking	Normal	Normal	1	1	7	No	No	No	No	No	No	No	No	No	No	No	No	No	No	No	No	No	Yes	No	No
350	80390	Normal	63	60-74	6	0-6 years	Male	Married	< monthly minimum wage	labour	Sub-Urban	148	108	17.9	5				Hypertension	Underweight				Smoking	Normal	Normal	1	0	9	No	No	No	No	Yes	No	No	No	No	Yes	Yes	No	Yes	No	No	Yes	No	Yes	Yes	Yes
351	80391	Normal	63	60-74	12	> 7 years	Male	Married	< monthly minimum wage	profesional	Sub-Urban	130	90	21.48	2	89	112	38	Normal	Normal	Normal	Normal	High Risk	Smoking	Normal	Normal	0	0	10	Yes	No	No	No	Yes	No	No	No	Yes	No	Yes	No	Yes	No	Yes	No	No	Yes	Yes	Yes
352	80392	Normal	62	60-74	6	0-6 years	Female	Single	No Income	notworking	Sub-Urban	130	70	27.89	2	73	191	48	Normal	Overweight	Normal	Normal	Normal	Not Smoking	Normal	Normal	1	3	9	No	No	No	No	No	No	No	No	No	No	No	No	No	No	No	No	No	Yes	Yes	Yes
353	80393	Dementia	74	60-74	2	0-6 years	Female	Married	No Income	housewife	Sub-Urban	210	110	25.21	2	104	86	54	Hypertension	Overweight	Normal	Normal	Normal	Not Smoking	Normal	Normal	5	3	5	No	No	No	No	No	No	No	No	No	No	No	No	No	No	No	Yes	No	Yes	No	Yes
354	80394	Dementia	68	60-74	6	0-6 years	Female	Single	No Income	notworking	Sub-Urban	120	80	20.34	0	63	166	30	Normal	Normal	Normal	Normal	High Risk	Not Smoking	Normal	Normal	7	20	0	No	No	No	No	No	No	No	No	No	No	No	No	No	No	No	No	No	No	No	No
355	80395	Normal	75	>75	5	0-6 years	Male	Married	No Income	notworking	Sub-Urban	144	84	25.46	3	96	104	56	Hypertension	Overweight	Normal	Normal	Normal	Not Smoking	Normal	Normal	0	5	7	Yes	No	No	No	Yes	Yes	No	No	No	No	Yes	No	No	No	No	Yes	No	Yes	Yes	Yes
356	80396	Normal	67	60-74	6	0-6 years	Male	Married	< monthly minimum wage	labour	Sub-Urban	160	90	19.65	5				Hypertension	Normal				Smoking	Normal	Normal	1	4	7	Yes	No	Yes	No	Yes	No	No	No	No	No	Yes	No	Yes	No	No	Yes	No	Yes	Yes	Yes
357	80397	Dementia	66	60-74			Male	Married	No Income	notworking	Sub-Urban	208	110	24.84	5	141	208	44	Hypertension	Normal	Diabetes	High Risk	Normal	Smoking	Normal	Normal	4	13	7	No	No	No	No	Yes	No	No	No	No	No	Yes	No	Yes	No	No	Yes	No	Yes	Yes	No
358	80398	Normal	62	60-74	16	> 7 years	Male	Married	≥ monthly minimum wage	profesional	Sub-Urban	150	90	22.83	0	92	305	33	Hypertension	Normal	Normal	High Risk	High Risk	Smoking	Normal	Normal	0	0	10	Yes	No	No	No	Yes	No	No	No	No	No	Yes	No	No	No	No	Yes	No	Yes	Yes	Yes
359	80399	Normal	67	60-74	9	> 7 years	Female	Single	No Income	notworking	Sub-Urban	145	90	18.51	9	110	130	49	Hypertension	Normal	Normal	Normal	Normal	Not Smoking	Normal	Normal	3	5	9	No	No	No	No	Yes	No	No	No	No	No	No	No	Yes	No	Yes	Yes	No	Yes	No	No
360	80400	Normal	65	60-74	2	0-6 years	Male	Married	< monthly minimum wage	labour	Sub-Urban	140	70	18.13	1				Normal	Underweight				Smoking	Normal	Normal	0	0	7	Yes	No	No	Yes	Yes	Yes	No	No	No	No	Yes	No	Yes	No	No	Yes	No	Yes	Yes	Yes
361	80401	Dementia	77	>75	0	0-6 years	Female	Married	No Income	housewife	Sub-Urban	158	80	18.51	1	133	78	55	Hypertension	Normal	Diabetes	Normal	Normal	Not Smoking	Normal	Normal	2	7	5	No	No	No	No	No	No	No	No	Yes	Yes	No	No	Yes	No	No	Yes	No	Yes	Yes	Yes
362	80402	Dementia	67	60-74	5	0-6 years	Female	Married	No Income	housewife	Sub-Urban	180	90	20.54	1	85	108	48	Hypertension	Normal	Normal	Normal	Normal	Smoking	Normal	Normal	3	7	5	No	No	No	No	No	No	No	No	Yes	Yes	No	No	Yes	No	No	Yes	No	Yes	Yes	Yes
363	80403	Normal	60	60-74	6	0-6 years	Male	Married	≥ monthly minimum wage	profesional	Sub-Urban	132	82	20.32	0				Normal	Normal				Not Smoking	Normal	Normal	0	0	9	No	No	No	No	No	No	No	No	No	No	No	No	Yes	No	No	Yes	No	Yes	Yes	Yes
364	80404	Normal	67	60-74	6	0-6 years	Male	Married	< monthly minimum wage	labour	Sub-Urban	150	78	18.59	1	80	58	53	Hypertension	Normal	Normal	Normal	Normal	Smoking	Normal	Normal	0	3	9	Yes	No	No	No	Yes	No	No	No	No	No	Yes	Yes	Yes	No	Yes	Yes	No	Yes	Yes	Yes
365	80405	Normal	64	60-74	5	0-6 years	Female	Single	No Income	housewife	Sub-Urban	150	82	15.07	1				Hypertension	Underweight					Normal	Normal	0	1	8	No	No	No	No	No	No	No	No	Yes	Yes	Yes	No	Yes	No	No	Yes	No	Yes	No	Yes
366	80406	Dementia	79	>75	6	0-6 years	Male	Married	< monthly minimum wage	labour	Sub-Urban	130	100	20.31	5				Hypertension	Normal				Smoking	Normal	Normal	3	0	5	No	No	Yes	No	No	No	No	No	No	No	Yes	No	Yes	No	No	No	No	Yes	No	No
367	80407	Normal	62	60-74	6	0-6 years	Female	Married	No Income	housewife	Sub-Urban	160	90	21.21	0	84	96	71	Hypertension	Normal	Normal	Normal	Normal	Not Smoking	Normal	Normal	0	1	7	Yes	No	No	No	No	No	No	No	No	No	Yes	No	No	No	No	Yes	No	Yes	Yes	Yes
368	80408	Normal	73	60-74	6	0-6 years	Female	Single			Sub-Urban	190	130	22.81	0				Hypertension	Normal				Not Smoking	Normal	Normal	0	0	6	Yes	No	No	Yes	Yes	No	No	No	No	Yes	No	No	Yes	No	Yes	Yes	No	Yes	Yes	Yes
369	80409	Dementia	74	60-74	2	0-6 years	Female	Single	No Income	housewife	Sub-Urban	130	70	19.7	0	95	125	46	Normal	Normal	Normal	Normal	Normal	Not Smoking	Normal	Normal	2	0	5	No	No	No	No	No	No	No	No	No	No	No	No	No	No	No	Yes	No	Yes	Yes	Yes
370	80410	Normal	73	60-74	6	0-6 years	Female	Married	No Income	housewife	Sub-Urban	180	100	22.35	0				Hypertension	Normal				Not Smoking	Normal	Normal	1	1	7	Yes	No	No	No	No	No	No	No	No	No	No	No	Yes	No	Yes	Yes	No	Yes	Yes	Yes
371	80411	Normal	73	60-74	6	0-6 years	Male	Married	< monthly minimum wage	labour	Sub-Urban	160	90	17.9	5				Hypertension	Underweight				Smoking	Normal	Normal	3	0	7	Yes	No	No	No	Yes	No	No	No	No	No	Yes	No	No	No	No	Yes	No	Yes	No	No
372	80412	Dementia	77	>75	2	0-6 years	Female		No Income	notworking	Sub-Urban	156	80		7	89	143	35	Hypertension		Normal	Normal	High Risk	Not Smoking	Normal	Normal	4	1	4	No	No	No	No	No	No	No	No	No	No	No	No	No	No	No	Yes	No	Yes	No	No
373	80413	Normal	77	>75	6	0-6 years	Male	Married	No Income	notworking	Sub-Urban	130	90	14.96	2				Normal	Underweight				Smoking	Normal	Normal	0	7	8	Yes	No	No	No	No	No	No	No	No	No	No	No	Yes	No	No	Yes	No	Yes	Yes	Yes
374	80414	Normal	71	60-74	6	0-6 years	Female	Single	< monthly minimum wage	profesional	Sub-Urban	165	98	32.3		87	116	59	Hypertension	Obesitas	Normal	Normal	Normal	Not Smoking	Normal		0	2	6	Yes	No	No	No	No	No	No	No	No	No	Yes	No	Yes	No	No	Yes	No	Yes	Yes	No
375	80415	Normal	87	>75	6	0-6 years	Male	Married	No Income	notworking	Sub-Urban	115	90	16.65	7	80	103	41	Normal	Underweight	Normal	Normal	Normal	Smoking	Normal	Normal	2	2	6	No	No	No	No	Yes	No	No	No	No	Yes	Yes	No	Yes	No	No	Yes	No	Yes	No	Yes
376	80416	Normal	67	60-74	3	0-6 years	Female	Single	No Income	housewife	Sub-Urban	130	90	24.64	3	89	50	66	Normal	Normal	Normal	Normal	Normal	Not Smoking	Normal	Normal	0	1	10	No	No	No	No	No	No	No	No	No	No	No	No	No	No	No	Yes	No	Yes	Yes	Yes
377	80417	Normal	83	>75	6	0-6 years	Male	Married	No Income	notworking	Sub-Urban	150	98	19	7	102	109	71	Hypertension	Normal	Normal	Normal	Normal	Smoking	Normal	Normal	1	0	7	Yes	No	No	No	Yes	Yes	No	No	No	No	Yes	No	No	No	No	Yes	No	Yes	No	Yes
378	80418	Dementia	74	60-74	6	0-6 years	Male	Married	< monthly minimum wage	labour	Sub-Urban	112	78	20.6	2				Normal	Normal				Smoking	Normal	Normal	1	0	5	No	No	No	No	Yes	No	No	No	No	No	No	No	Yes	No	No	Yes	No	Yes	Yes	No
379	80419	Dementia	73	60-74	9	> 7 years	Male	Married	< monthly minimum wage	profesional	Sub-Urban	178	106	14.33	6	75	90	45	Hypertension	Underweight	Normal	Normal	Normal	Smoking	Normal	Normal	3	3	6	Yes	No	No	No	No	Yes	No	No	No	No	Yes	No	Yes	No	No	No	No	Yes	Yes	Yes
380	80420	Dementia	78	>75	0	0-6 years	Female	Single	No Income	housewife	Sub-Urban	160	98	20.12	6	119	71	67	Hypertension	Normal	Normal	Normal	Normal		Normal	Normal	1	2	4	No	No	No	No	No	No	No	No	No	No	No	No	Yes	No	No	Yes	No	Yes	Yes	No
381	80421	Normal	73	60-74	5	0-6 years	Female	Married	No Income	housewife	Sub-Urban	180	110	23.44	0	80	145	60	Hypertension	Normal	Normal	Normal	Normal	Not Smoking	Normal	Normal	0	2	6	No	No	No	No	No	No	No	No	No	No	No	No	No	No	No	Yes	No	Yes	No	No
382	80422	Normal	63	60-74	5	0-6 years	Female	Single	No Income	housewife	Sub-Urban	144	80	24.47	6	93	59	67	Hypertension	Normal	Normal	Normal	Normal	Not Smoking	Normal	Normal	0	1	8	No	No	No	No	No	No	No	No	No	No	Yes	No	Yes	No	No	Yes	No	Yes	Yes	Yes
383	80423	Dementia	65	60-74	2	0-6 years	Female	Married	No Income	notworking	Sub-Urban	124	85	24.09	6	68	214	43	Normal	Normal	Normal	High Risk	Normal	Not Smoking	Normal	Normal	0	0	5	No	No	No	No	Yes	Yes	No	No	No	Yes	Yes	No	Yes	No	Yes	Yes	No	Yes	No	Yes
384	80424	Normal	67	60-74	5	0-6 years	Male	Married	< monthly minimum wage	labour	Sub-Urban	168	88	17.35	4				Hypertension	Underweight				Smoking	Normal	Normal	0	1	7	No	No	No	No	Yes	Yes	No	No	No	No	No	No	Yes	No	No	Yes	No	Yes	No	No
385	80425	Normal	67	60-74	5	0-6 years	Female	Married	< monthly minimum wage	labour	Sub-Urban	170	110	19.42	2	99	57	70	Hypertension	Normal	Normal	Normal	Normal	Not Smoking	Normal	Normal	0	2	7	No	No	No	No	No	No	No	No	No	No	No	No	No	No	No	Yes	No	Yes	No	Yes
386	80426	Normal	75	>75	6	0-6 years	Female	Single	No Income	housewife	Sub-Urban	160	80	27.88	6	66	117	60	Hypertension	Overweight	Normal	Normal	Normal	Smoking	Normal	Normal	3	0	9	Yes	No	No	No	No	No	No	No	No	No	No	No	No	No	No	Yes	No	Yes	No	Yes
387	80427	Normal	73	60-74	6	0-6 years	Male	Married	No Income	notworking	Sub-Urban	168	90	21.56	10	96	175	27	Hypertension	Normal	Normal	Normal	High Risk	Not Smoking	Normal	Depression	0	2	8	Yes	No	No	No	Yes	No	No	No	Yes	No	No	No	Yes	No	No	Yes	No	Yes	Yes	No
388	80428	Normal	74	60-74	9	> 7 years	Male	Married	< monthly minimum wage	profesional	Sub-Urban	198	120	28.82	0				Hypertension	Overweight				Smoking	Normal	Normal	0	3	9	No	No	No	No	Yes	No	No	No	No	No	No	No	No	No	No	No	No	No	No	No
389	80429	Normal	72	60-74	6	0-6 years	Female	Married	No Income	housewife	Sub-Urban	140	90	16.06	1	96	54	58	Normal	Underweight	Normal	Normal	Normal	Not Smoking	Normal	Normal	0	0	9	Yes	No	No	No	Yes	No	No	No	No	No	No	No	Yes	No	No	Yes	No	Yes	Yes	Yes
390	80430	Normal	63	60-74	6	0-6 years	Female	Married	< monthly minimum wage		Sub-Urban	201	130	31.59	4	71	80	51	Hypertension	Obesitas	Normal	Normal	Normal	Not Smoking	Normal	Normal	0	0	10	Yes	No	No	No	No	No	No	No	Yes	No	No	Yes	No	No	Yes	No	Yes	Yes	Yes	Yes
391	80431	Normal	68	60-74	6	0-6 years	Female	Single	No Income	housewife	Sub-Urban	230	120	20.61	1	83	64	46	Hypertension	Normal	Normal	Normal	Normal	Not Smoking	Normal	Normal	0	1	9	Yes	No	No	No	No	No	No	No	No	Yes	No	No	Yes	No	No	Yes	No	Yes	No	Yes
392	80432	Normal	81	>75	6	0-6 years	Male	Married	< monthly minimum wage	labour	Sub-Urban	160	90	17.67	11	88	89	62	Hypertension	Underweight	Normal	Normal	Normal	Smoking	Normal	Depression	3	4	7	No	No	No	No	No	No	No	No	No	No	No	No	No	No	No	No	No	Yes	Yes	Yes
393	80433	Dementia	71	60-74	6	0-6 years	Male	Married	< monthly minimum wage	labour	Sub-Urban	120	80	22.65	6	66	137	46	Normal	Normal	Normal	Normal	Normal	Smoking	Normal	Normal	2	0	5	No	No	No	No	No	No	No	No	No	No	No	Yes	No	Yes	No	Yes	Yes	Yes	Yes	Yes
394	80434	Dementia	78	>75	1	0-6 years	Female	Single	No Income	notworking	Sub-Urban	160	90		10	87	146	52	Hypertension		Normal	Normal	Normal	Not Smoking	Normal	Depression	0	1	3	No	No	No	No	No	No	No	No	No	No	No	No	Yes	No	No	Yes	No	No	No	No
395	80435	Normal	63	60-74	6	0-6 years	Female	Married	≥ monthly minimum wage	profesional	Sub-Urban	140	90	29.76	1	92	122	52	Normal	Overweight	Normal	Normal	Normal	Not Smoking	Normal	Normal	0	4	9	No	No	No	No	No	Yes	No	No	No	No	Yes	No	Yes	No	No	Yes	No	Yes	Yes	Yes
396	80436	Normal	69	60-74	6	0-6 years	Male				Sub-Urban	150	90	21.78	0				Hypertension	Normal					Normal	Normal	0	2	9	Yes	No	No	No	Yes	No	No	No	No	No	Yes	No	Yes	No	No	Yes	No	No	No	No
397	80437	Normal	64	60-74	6	0-6 years	Female	Married	No Income	housewife	Sub-Urban	158	73	26.57	1	78	146	49	Hypertension	Overweight	Normal	Normal	Normal	Not Smoking	Normal	Normal	2	1	9	Yes	No	No	Yes	No	No	No	No	No	No	No	No	No	No	No	Yes	Yes	Yes	Yes	Yes
398	80438	Normal	74	60-74	6	0-6 years	Male	Married	< monthly minimum wage	profesional	Sub-Urban	140	80	23.26	3	82	189	58	Normal	Normal	Normal	Normal	Normal	Smoking	Normal	Normal	2	2	7	Yes	No	No	No	No	No	No	No	No	No	No	No	No	No	No	Yes	No	Yes	No	Yes
399	80439	Dementia	70	60-74	2	0-6 years	Female	Single	No Income	notworking	Sub-Urban	160	80	14.5	0	95	71	68	Hypertension	Underweight	Normal	Normal	Normal	Not Smoking	Normal	Normal	8	7	3	No	No	No	No	No	No	No	No	No	No	No	No	Yes	No	Yes	No	No	No	No	No
400	80440	Normal	72	60-74	3	0-6 years	Female	Married	No Income	notworking	Sub-Urban	150	100		6	136	199	60	Hypertension		Diabetes	Normal	Normal	Not Smoking	Normal	Normal	1	7	6	No	No	No	No	No	No	No	No	No	No	No	No	No	No	No	Yes	No	Yes	No	Yes
401	80441	Normal	78	>75	3	> 7 years	Female	Single	No Income	notworking	Sub-Urban	120	80	19.19	1	91	146	52	Normal	Normal	Normal	Normal	Normal	Not Smoking	Normal	Normal	0	1	7	No	No	No	No	No	Yes	No	No	No	No	Yes	No	Yes	No	No	No	Yes	No	Yes	No
402	80442	Dementia	60	60-74	9	0-6 years	Female	Married	No Income	housewife	Sub-Urban	160	100	22.56	2	89	117	67	Hypertension	Normal	Normal	Normal	Normal	Not Smoking	Normal	Normal	0	0	8	No	No	No	No	Yes	Yes	No	No	No	Yes	Yes	No	Yes	No	Yes	Yes	No	Yes	Yes	Yes
403	80443	Dementia	75	>75	2	0-6 years	Female	Single	No Income	notworking	Sub-Urban	130	80	18.49	2	107	98	71	Normal	Underweight	Normal	Normal	Normal	Not Smoking	Normal	Normal	4	0	5	No	No	No	No	No	No	No	No	No	No	No	No	No	No	No	No	No	Yes	Yes	No
404	80444	Normal	62	60-74	6	> 7 years	Female	Married	No Income	housewife	Sub-Urban	150	100	19.84	1				Hypertension	Normal				Not Smoking	Normal	Normal	0	0	9	No	No	No	No	No	No	No	No	No	No	Yes	No	No	No	No	Yes	No	Yes	No	Yes
405	80445	Normal	73	60-74	12	0-6 years	Male	Married	≥ monthly minimum wage	profesional	Sub-Urban	140	90	25.89	2	110	183	28	Normal	Overweight	Normal	Normal	High Risk	Not Smoking	Normal	Normal	0	0	9	No	No	No	No	No	No	No	No	No	No	Yes	No	No	No	No	Yes	No	Yes	Yes	Yes
406	80446	Normal	71	60-74	2	0-6 years	Female	Single	No Income	notworking	Sub-Urban	160	90	22.1	1				Hypertension	Normal				Not Smoking	Normal	Normal	3	0	6	No	No	No	No	No	No	No	No	No	No	No	No	No	No	No	No	No	Yes	Yes	Yes
407	80447	Normal	67	60-74	6	0-6 years	Female	Single	No Income	notworking	Sub-Urban	144	80	23.08	3	80	94	47	Hypertension	Normal	Normal	Normal	Normal	Not Smoking	Normal	Normal	3	1	6	No	No	No	No	No	No	No	No	No	No	No	No	No	No	No	Yes	No	Yes	Yes	No
408	80449	Normal	69	60-74	6	0-6 years	Female	Single	No Income	housewife	Sub-Urban	160	100	18.06	6				Hypertension	Underweight				Not Smoking	Normal	Normal	2	2	7	No	No	No	No	No	No	No	Yes	No	No	No	No	No	No	No	Yes	No	Yes	Yes	Yes
409	80450	Normal	86	>75	6	> 7 years	Female	Single	No Income	notworking	Sub-Urban	125	80	20.41	4				Normal	Normal				Not Smoking	Normal	Normal	1	11	9	No	No	No	No	No	No	No	No	No	No	No	No	Yes	No	No	Yes	No	Yes	No	No
410	80451	Normal	68	60-74	9	0-6 years	Male	Married	< monthly minimum wage	profesional	Sub-Urban	150	80	21.34	7	108	161	40	Hypertension	Normal	Normal	Normal	Normal	Smoking	Normal	Normal	0	2	9	No	No	No	No	Yes	Yes	No	No	No	No	Yes	No	Yes	No	Yes	Yes	No	Yes	Yes	No
411	80452	Dementia	80	>75	6	0-6 years	Female	Single	No Income	notworking	Sub-Urban	210	90		5	99	94	41	Hypertension		Normal	Normal	Normal	Not Smoking	stroke	Normal	0	22	5	No	No	No	No	No	No	No	No	No	No	No	No	No	No	No	No	No	Yes	Yes	No
412	80453	Normal	71	60-74	6	0-6 years	Male	Married	No Income	notworking	Sub-Urban	160	100	19.82	1	81	55	62	Hypertension	Normal	Normal	Normal	Normal	Smoking	Normal	Normal	0	0	9	Yes	No	No	No	Yes	No	No	No	No	No	Yes	No	Yes	No	No	Yes	No	Yes	Yes	Yes
413	80454	Normal	64	60-74	6	> 7 years	Male	Married	< monthly minimum wage	profesional	Sub-Urban	166	110	19.83	9	83	131	46	Hypertension	Normal	Normal	Normal	Normal	Smoking	Normal	Normal	5	3	9	No	No	No	No	No	No	No	No	No	No	No	No	No	No	No	Yes	No	Yes	Yes	No
414	80455	Normal	65	60-74	9	0-6 years	Male	Married	< monthly minimum wage	profesional	Sub-Urban	154	90	28.07	5	83	89	60	Hypertension	Overweight	Normal	Normal	Normal	Smoking	Normal	Normal	0	0	10	Yes	No	Yes	No	Yes	No	No	No	No	No	Yes	Yes	Yes	No	Yes	Yes	No	Yes	Yes	Yes
415	80456	Normal	73	60-74	6	0-6 years	Male	Married	< monthly minimum wage	labour	Sub-Urban	130	70	20.66	1	77	65	42	Normal	Normal	Normal	Normal	Normal	Smoking	Normal	Normal	0	5	7	No	No	No	No	Yes	Yes	No	No	Yes	Yes	Yes	No	Yes	No	No	Yes	No	Yes	Yes	Yes
416	80457	Dementia	68	60-74	6	0-6 years	Female	Married	No Income	housewife	Sub-Urban	120	80	17.45	3				Normal	Underweight				Not Smoking	Normal	Normal	0	0	5	No	No	No	No	No	No	No	No	No	No	No	No	Yes	No	No	No	No	Yes	Yes	Yes
417	80458	Normal	71	60-74	6	0-6 years	Male	Married	≥ monthly minimum wage	labour	Sub-Urban	150	70	20.84	0	63	58	63	Hypertension	Normal	Normal	Normal	Normal	Smoking	Normal	Normal	0	2	9	Yes	No	No	No	Yes	No	No	No	No	No	Yes	No	Yes	No	Yes	Yes	No	Yes	Yes	Yes
418	80459	Normal	64	60-74	6	0-6 years	Male	Married	No Income	housewife	Sub-Urban	130	70	23.42	0	82	78	46	Normal	Normal	Normal	Normal	Normal	Not Smoking	Normal	Normal	1	0	9	Yes	No	No	No	Yes	Yes	No	No	No	Yes	Yes	No	Yes	No	Yes	Yes	No	Yes	No	Yes
419	80460	Normal	61	60-74	6	0-6 years	Female	Married	No Income	housewife	Sub-Urban	140	100	25.2	6	79	86	60	Hypertension	Overweight	Normal	Normal	Normal	Not Smoking	Normal	Normal	2	0	10	Yes	No	No	No	No	Yes	No	No	No	No	Yes	No	Yes	No	Yes	Yes	No	Yes	No	Yes
420	80461	Dementia	83	>75	0	0-6 years	Female	Single	≥ monthly minimum wage	profesional	Sub-Urban	200	90	18.85	7	166	64	57	Hypertension	Normal	Diabetes	Normal	Normal	Not Smoking	Normal	Normal	4	5	3	No	No	No	No	No	No	No	No	No	No	No	No	No	No	No	Yes	No	Yes	No	Yes
421	80462	Normal	62	60-74	6	> 7 years	Male	Married	< monthly minimum wage	profesional	Sub-Urban	110	90	20.24	1				Normal	Normal				Smoking	Normal	Normal	1	2	9	No	No	No	No	No	No	No	No	No	No	No	No	No	No	No	Yes	No	No	Yes	No
422	80463	Normal	62	60-74	15	> 7 years	Female	Married	≥ monthly minimum wage	profesional	Sub-Urban	190	100	24.26	0	78	117	63	Hypertension	Normal	Normal	Normal	Normal	Not Smoking	Normal	Normal	1	0	10	Yes	No	No	No	No	No	No	No	No	No	No	No	No	No	Yes	No	No	Yes	Yes	Yes
423	80464	Normal	62	60-74	9	0-6 years	Male	Married	< monthly minimum wage	profesional	Sub-Urban	180	100	23.67	12	89	251	35	Hypertension	Normal	Normal	High Risk	High Risk	Smoking	Normal	Depression	5	6	10	No	No	No	No	No	No	No	No	No	No	No	No	No	No	No	No	No	Yes	No	No
424	80465	Dementia	71	60-74	0	0-6 years	Female	Single	No Income	notworking	Sub-Urban	190	100	19.29	5	106	113	54	Hypertension	Normal	Normal	Normal	Normal	Not Smoking	Normal	Normal	6	6	2	No	No	No	No	No	No	No	No	No	No	No	No	No	No	No	No	No	Yes	No	Yes
425	80466	Normal	65	60-74	6	> 7 years	Female	Married	No Income	housewife	Sub-Urban	138	90	27.65	1				Normal	Overweight				Not Smoking	Normal	Normal	3	1	9	No	No	No	No	No	No	No	No	No	Yes	Yes	No	Yes	No	No	Yes	No	Yes	Yes	Yes
426	80467	Normal	60	60-74	9	0-6 years	Male	Married	< monthly minimum wage	profesional	Sub-Urban	148	110	19.81	1				Hypertension	Normal				Smoking	Normal	Normal	0	0	10	Yes	No	No	No	No	No	No	No	No	No	Yes	No	Yes	No	No	Yes	No	Yes	Yes	Yes
427	80468	Dementia	76	>75	0	0-6 years	Female	Married	No Income	notworking	Sub-Urban	110	60	15.86	3				Normal	Underweight				Not Smoking	Normal	Normal	6	11	3	No	No	No	No	Yes	No	No	No	No	No	No	No	Yes	No	No	No	No	Yes	No	No
428	80469	Normal	60	60-74	5	0-6 years	Female	Married	No Income	notworking	Sub-Urban	170	100	21.88	9				Hypertension	Normal				Not Smoking	Normal	Normal	3	2	8	No	No	No	No	Yes	Yes	No	No	No	No	No	No	Yes	No	No	Yes	No	Yes	Yes	Yes
429	80470	Dementia	76	>75	15	> 7 years	Female	Single	No Income	notworking	Sub-Urban	90	70		2				Normal					Not Smoking	Normal	Normal	1	2	8	Yes	No	No	Yes	No	No	No	No	No	No	No	No	Yes	No	No	Yes	No	Yes	Yes	No
430	80471	Normal	60	60-74	12	> 7 years	Male	Married	≥ monthly minimum wage	profesional	Sub-Urban	160	90	27.22	1				Hypertension	Overweight					Normal	Normal	0	0	10	Yes	No	No	No	Yes	No	No	No	No	No	No	No	Yes	No	Yes	Yes	No	Yes	Yes	No
431	80472	Dementia	78	>75	0	0-6 years	Male	Married	No Income	notworking	Sub-Urban	150	80	14.71	8				Hypertension	Underweight				Smoking	Normal	Normal	1	1	6	No	No	No	No	No	No	No	No	No	No	No	No	No	No	No	No	No	Yes	No	No
432	80473	Normal	76	>75	12	> 7 years	Male	Married	≥ monthly minimum wage	profesional	Sub-Urban	160	80	22.76	2				Hypertension	Normal				Not Smoking	Normal	Normal	1	0	10	No	No	No	No	No	No	No	No	No	No	No	No	No	No	No	No	No	Yes	Yes	No
433	80474	Normal	65	60-74	9	> 7 years	Female	Married	No Income	housewife	Sub-Urban	164	92	26.01	2				Hypertension	Overweight				Not Smoking	Normal	Normal	0	0	10	Yes	No	No	No	No	Yes	No	No	Yes	Yes	Yes	No	Yes	No	Yes	Yes	No	Yes	Yes	Yes
434	80475	Dementia	73	60-74	6	0-6 years	Male	Single	No Income	notworking	Sub-Urban	130	70	16.2	1				Normal	Underweight				Smoking	Normal	Normal	2	6	4	No	No	No	No	No	No	No	No	No	No	No	No	Yes	No	No	Yes	No	Yes	Yes	Yes
435	80476	Normal	60	60-74	4	0-6 years	Male	Married	< monthly minimum wage	labour	Sub-Urban	140	80	24.02	1				Normal	Normal				Smoking	Normal	Normal	0	0	8	No	No	No	No	Yes	No	No	No	No	No	Yes	No	No	No	Yes	Yes	No	Yes	Yes	No
436	80477	Normal	63	60-74	6	0-6 years	Male	Married	No Income	notworking	Sub-Urban	160	100	23.33	2	147	161	48	Hypertension	Normal	Diabetes	Normal	Normal	Smoking	Normal	Normal	3	0	7	No	No	No	No	No	No	No	Yes	No	No	Yes	No	Yes	No	No	No	No	Yes	Yes	Yes
437	80478	Dementia	93	>75	5	0-6 years	Male	Single	No Income	notworking	Sub-Urban	180	100	20.12	11				Hypertension	Normal				Smoking	Normal	Depression	4	10	3	No	No	No	No	No	No	No	No	No	No	No	No	No	No	No	No	No	Yes	No	No
438	80479	Normal	69	60-74	6	0-6 years	Female	Single	No Income	notworking	Sub-Urban	120	70	23.89	0	91	88	54	Normal	Normal	Normal	Normal	Normal	Not Smoking	Normal	Normal	1	0	8	Yes	No	No	No	No	No	No	No	No	Yes	No	No	Yes	No	No	Yes	No	Yes	No	No
439	80480	Normal	78	>75	6	0-6 years	Female	Single	≥ monthly minimum wage	profesional	Sub-Urban	190	100	20.98	2				Hypertension	Normal					Normal	Normal	4	4	6	Yes	No	No	No	No	No	No	No	No	No	Yes	No	Yes	No	No	Yes	No	Yes	No	Yes
440	80481	Normal	67	60-74	6	0-6 years	Female	Single	No Income	housewife	Sub-Urban	140	80	29.58	4	89	92	46	Normal	Overweight	Normal	Normal	Normal	Not Smoking	Normal	Normal	3	1	6	No	No	No	No	No	No	No	No	No	No	No	No	No	No	No	No	No	No	No	No
441	80482	Normal	73	60-74	6	0-6 years	Male	Single	No Income	notworking	Sub-Urban	180	100	25.62	2	95	91	42	Hypertension	Overweight	Normal	Normal	Normal	Smoking	Normal	Normal	0	0	10	No	No	No	No	No	No	No	No	No	No	No	No	No	No	No	No	No	No	No	No
442	80483	Normal	81	>75	5	0-6 years	Female	Single	No Income	notworking	Sub-Urban	150	70	23.73	2				Hypertension	Normal				Not Smoking	Normal	Normal	0	0	7	No	No	No	No	No	No	No	No	No	No	No	No	No	No	No	No	No	No	No	No
443	80484	Normal	61	60-74	12	> 7 years	Male	Married	≥ monthly minimum wage	profesional	Sub-Urban	180	110	28.99	1	83	64	44	Hypertension	Overweight	Normal	Normal	Normal	Smoking	Normal	Normal	3	2	10	Yes	No	No	No	Yes	No	Yes	No	Yes	Yes	Yes	No	Yes	No	No	Yes	No	Yes	No	No
444	80485	Normal	60	60-74	9	> 7 years	Female	Married	No Income	housewife	Sub-Urban	135	75	22.64	4				Normal	Normal				Smoking	Normal	Normal	0	0	9	Yes	No	No	No	No	No	No	No	Yes	Yes	No	No	Yes	No	Yes	Yes	No	Yes	No	Yes
445	80486	Normal	65	60-74	6	0-6 years	Male	Married	No Income	notworking	Sub-Urban	160	75	24.49	9				Hypertension	Normal				Smoking	Normal	Normal	4	0	9	Yes	No	No	No	No	No	No	No	No	Yes	Yes	No	No	No	Yes	No	No	Yes	Yes	Yes
446	80487	Normal			6	0-6 years	Male				Sub-Urban	120	60	26.29	3	91	71	51	Normal	Overweight	Normal	Normal	Normal		Normal	Normal	2	3	8	No	No	No	No	Yes	No	No	No	No	No	No	No	No	No	No	Yes	No	Yes	Yes	No
447	80488	Normal			2	0-6 years	Female				Sub-Urban	170	90	26.39	1	91	127	51	Hypertension	Overweight	Normal	Normal	Normal		Normal	Normal	0	1	8	Yes	No	No	No	Yes	No	No	No	No	Yes	Yes	No	Yes	No	Yes	Yes	No	Yes	Yes	Yes
448	80489	Normal	60	60-74	6	0-6 years	Female				Sub-Urban	140	100	27.86	3	85	163	38	Hypertension	Overweight	Normal	Normal	High Risk		Normal	Normal	0	0	9	Yes	No	No	No	No	Yes	No	No	No	Yes	Yes	No	No	No	Yes	Yes	No	Yes	Yes	Yes
449	80490	Dementia	91	>75	6	> 7 years	Male	Married	No Income	notworking	Sub-Urban	150	60	23.46	1				Hypertension	Normal				Smoking	Normal	Normal	2	0	4	No	No	No	No	Yes	No	No	No	No	No	Yes	No	No	No	Yes	Yes	No	Yes	Yes	No
450	80491	Normal	67	60-74	6	0-6 years	Female	Married	No Income	housewife	Sub-Urban	145	85	32.89	5	88	170	42	Hypertension	Obesitas	Normal	Normal	Normal	Not Smoking	Normal	Normal	1	1	8	Yes	No	No	No	Yes	No	No	No	No	Yes	No	No	Yes	No	No	Yes	No	Yes	No	Yes
451	80492	Normal	67	60-74	6	0-6 years	Male	Married	≥ monthly minimum wage	profesional	Sub-Urban	120	64	19.26	5				Normal	Normal				Smoking	Normal	Normal	0	0	8	No	No	No	No	No	No	No	No	No	No	Yes	No	Yes	No	No	Yes	No	Yes	Yes	No
452	80493	Dementia	70	60-74	9	0-6 years	Male	Single	≥ monthly minimum wage	profesional	Sub-Urban	172	94	19.26	1	88	132	23	Hypertension	Normal	Normal	Normal	High Risk	Not Smoking	Normal	Normal	2	1	7	Yes	No	No	No	Yes	No	Yes	No	No	No	No	No	Yes	No	Yes	Yes	No	Yes	Yes	No
453	80494	Dementia	65	60-74	2	0-6 years	Female	Single	No Income	notworking	Sub-Urban	220	140	25.78	7	116	80	56	Hypertension	Overweight	Normal	Normal	Normal	Not Smoking	Normal	Normal	5	3	4	No	No	No	No	Yes	No	No	No	No	No	No	No	Yes	No	No	No	No	Yes	Yes	No
454	80495	Normal	69	60-74	6	0-6 years	Female	Single	≥ monthly minimum wage	profesional	Sub-Urban	135	90	29.26	8	88	143	39	Normal	Overweight	Normal	Normal	High Risk	Not Smoking	Normal	Normal	2	0	8	Yes	No	No	No	No	No	No	No	No	Yes	No	No	Yes	No	No	Yes	No	Yes	Yes	Yes
455	80496	Normal	64	60-74	6	0-6 years	Male	Married	≥ monthly minimum wage	profesional	Sub-Urban	138	98	24.19	3	131	225	46	Hypertension	Normal	Diabetes	High Risk	Normal	Smoking	Normal	Normal	1	0	9	No	No	No	Yes	Yes	No	No	No	Yes	No	Yes	No	No	No	No	Yes	No	Yes	Yes	No
456	80497	Dementia	73	60-74	6	0-6 years	Male	Single	< monthly minimum wage	labour	Sub-Urban	180	100	18.68	1				Hypertension	Normal				Smoking	Normal	Normal	1	1	5	No	No	No	No	Yes	No	No	No	No	No	Yes	No	Yes	No	No	Yes	No	Yes	No	No
457	80498	Dementia	77	>75	0	> 7 years	Female	Single	No Income	notworking	Sub-Urban	120	78	20.78	4	130	152	58	Normal	Normal	Diabetes	Normal	Normal	Not Smoking	Normal	Normal	0	7	5	No	No	No	No	No	No	No	No	No	No	No	No	Yes	No	No	No	No	Yes	Yes	Yes
458	80499	Normal	61	60-74	6	0-6 years	Female	Single	No Income	notworking	Sub-Urban	160	100	17.86	3	78	115	37	Hypertension	Underweight	Normal	Normal	High Risk	Not Smoking	Normal	Normal	2	0	6	No	No	No	No	Yes	No	No	No	No	No	Yes	No	Yes	No	No	Yes	No	Yes	Yes	Yes
459	80500	Normal	70	60-74	6	0-6 years	Male	Married	< monthly minimum wage	labour	Sub-Urban	170	85	18.46	4				Hypertension	Underweight				Smoking	Normal	Normal	1	1	8	No	No	No	No	Yes	No	No	No	No	No	Yes	No	Yes	No	No	Yes	No	Yes	No	Yes
460	80501	Normal	63	60-74	12	> 7 years	Male	Married	No Income	notworking	Sub-Urban	190	110	21.28	0				Hypertension	Normal				Smoking	Normal	Normal	0	0	10	No	No	No	No	No	No	No	No	No	No	No	No	No	No	No	Yes	No	Yes	Yes	No
461	80502	Dementia	66	60-74	5	> 7 years	Female	Single	No Income	housewife	Sub-Urban	120	80	22.92	2	83	83	68	Normal	Normal	Normal	Normal	Normal	Not Smoking	Normal	Normal	0	0	4	No	No	No	No	No	No	No	No	No	No	No	No	No	No	No	Yes	No	Yes	No	Yes
462	80503	Dementia	68	60-74	6	0-6 years	Female	Single	No Income	notworking	Sub-Urban	165	105	30.55	2				Hypertension	Obesitas				Not Smoking	Normal	Normal	1	0	5	No	No	No	No	No	No	No	No	No	No	No	No	No	No	No	Yes	No	Yes	No	No
463	80504	Normal	71	60-74	12	0-6 years	Female	Single	≥ monthly minimum wage	profesional	Sub-Urban	110	70	17.93	1	88	126	49	Normal	Underweight	Normal	Normal	Normal	Not Smoking	Normal	Normal	0	0	9	Yes	No	No	No	No	Yes	No	No	No	No	No	No	No	No	No	No	No	Yes	Yes	Yes
464	80505	Dementia	76	>75	12	0-6 years	Male	Married	≥ monthly minimum wage	profesional	Sub-Urban	150	90	19.56	5	65	79	50	Hypertension	Normal	Normal	Normal	Normal	Smoking	Normal	Normal	3	4	8	No	No	No	No	Yes	No	No	No	No	No	No	No	No	No	No	Yes	No	Yes	Yes	Yes
465	80506	Normal	81	>75	6	0-6 years	Male	Married	< monthly minimum wage	labour	Sub-Urban	130	90	22.31	1	108	116	58	Normal	Normal	Normal	Normal	Normal	Smoking	Normal	Normal	0	2	9	Yes	No	No	No	No	No	No	No	Yes	No	Yes	No	No	No	No	Yes	No	Yes	Yes	No
466	80507	Normal	66	60-74	6	0-6 years	Female	Married	≥ monthly minimum wage	profesional	Sub-Urban	150	90	21.35	2	81	73	66	Hypertension	Normal	Normal	Normal	Normal	Not Smoking	Normal	Normal	2	1	10	No	No	No	No	No	No	No	Yes	No	No	No	No	No	No	No	Yes	No	Yes	No	Yes
467	80508	Dementia	70	60-74	6	0-6 years	Female	Single	No Income	notworking	Sub-Urban	150	70	14.49	11	98	77	48	Hypertension	Underweight	Normal	Normal	Normal	Not Smoking	Normal	Depression	8	12	1	No	No	No	No	No	No	No	No	No	No	No	No	Yes	No	No	No	No	Yes	No	Yes
468	80509	Dementia	75	>75	5	0-6 years	Female	Single	No Income	notworking	Sub-Urban	170	110	23.08	7				Hypertension	Normal				Not Smoking	Normal	Normal	7	15	4	No	No	No	No	No	No	No	No	No	No	No	No	No	No	No	No	No	No	No	No
469	80510	Normal	60	60-74	5	0-6 years	Female	Single	No Income	notworking	Sub-Urban	140	85	24.63	5	83	52	66	Normal	Normal	Normal	Normal	Normal	Not Smoking	Normal	Normal	4	1	9	Yes	No	No	No	Yes	No	No	No	No	Yes	Yes	No	Yes	Yes	Yes	Yes	No	Yes	Yes	Yes
470	80511	Normal	70	60-74	6	0-6 years	Male	Married	≥ monthly minimum wage	profesional	Sub-Urban	120	70	24.73	4	99	126	61	Normal	Normal	Normal	Normal	Normal	Not Smoking	Normal	Normal	0	0	8	Yes	No	No	No	Yes	No	No	No	No	No	No	No	No	No	No	No	No	Yes	No	No
471	80512	Dementia	67	60-74	6	> 7 years	Male	Married	< monthly minimum wage	labour	Sub-Urban	90	60	21.35	3	78	95	44	Normal	Normal	Normal	Normal	Normal	Smoking	Normal	Normal	5	1	5	Yes	No	No	No	Yes	No	No	No	No	Yes	Yes	No	Yes	Yes	No	No	No	Yes	Yes	No
472	80513	Dementia	70	60-74	5	0-6 years	Female	Married	No Income	notworking	Sub-Urban	130	80	29.36	3	80	108	77	Normal	Overweight	Normal	Normal	Normal	Not Smoking	Normal	Normal	0	0	5	No	No	No	No	Yes	No	No	No	No	Yes	No	No	Yes	Yes	No	Yes	No	Yes	Yes	Yes
473	80514	Dementia	70	60-74	2	0-6 years	Female	Single	No Income	notworking	Sub-Urban	115	80	22.48	12	97	78	50	Normal	Normal	Normal	Normal	Normal	Not Smoking	Normal	Depression	8	5	6	No	No	No	No	No	No	No	No	No	Yes	No	No	Yes	No	No	No	No	Yes	No	Yes
474	80515	Normal	67	60-74	12	0-6 years	Male	Married	≥ monthly minimum wage	profesional	Sub-Urban	125	88	23.56	0				Normal	Normal				Smoking	Normal	Normal	1	0	10	Yes	No	No	No	No	No	No	No	No	No	No	No	No	No	No	No	No	Yes	No	No
475	80516	Normal	75	>75	6	0-6 years	Female	Single	No Income	notworking	Sub-Urban	190	110	20.12	4	81	100	61	Hypertension	Normal	Normal	Normal	Normal	Not Smoking	Normal	Normal	4	6	6	No	No	No	No	No	No	No	No	No	No	No	No	No	No	No	No	No	Yes	No	Yes
476	80517	Normal	66	60-74	6	0-6 years	Female	Single	No Income	notworking	Sub-Urban	145	95	26.38	7	92	95	50	Hypertension	Overweight	Normal	Normal	Normal	Not Smoking	Normal	Normal	3	1	7	No	No	No	No	No	No	No	No	No	No	Yes	No	No	No	No	Yes	No	Yes	No	Yes
477	80518	Normal	63	60-74	2	0-6 years	Female	Married	No Income	notworking	Sub-Urban	160	85	28.14	4				Hypertension	Overweight				Not Smoking	Normal	Normal	3	1	7	No	No	No	No	Yes	No	No	No	No	No	Yes	No	No	No	No	Yes	No	Yes	Yes	Yes
478	80519	Normal	74	60-74	6	0-6 years	Female	Single	No Income	notworking	Sub-Urban	150	90	22.96	11	108	96	58	Hypertension	Normal	Normal	Normal	Normal	Not Smoking	Normal	Depression	4	5	9	No	No	No	No	No	No	No	Yes	No	No	No	No	No	No	No	Yes	No	Yes	No	No
479	80520	Normal	69	60-74	6	0-6 years	Female	Married	No Income	notworking	Sub-Urban	160	100	24	7				Hypertension	Normal				Not Smoking	Normal	Normal	6	1	7	No	No	No	No	No	No	No	No	No	No	No	No	No	No	No	Yes	No	Yes	No	Yes
480	80521	Dementia	75	>75	5	0-6 years	Female	Single	No Income	notworking	Sub-Urban	160	70	21.55	11	86	157	71	Hypertension	Normal	Normal	Normal	Normal	Not Smoking	Normal	Depression	5	10	5	No	No	No	No	No	No	No	No	No	No	No	No	No	No	No	No	No	No	No	No
481	80522	Normal	78	>75	6	0-6 years	Female	Single	No Income	notworking	Sub-Urban	130	90	21.03	10				Normal	Normal				Not Smoking	Normal	Depression	6	13	7	No	No	No	No	No	No	No	Yes	No	No	No	No	No	No	No	No	No	Yes	No	No
482	80523	Dementia	83	>75	6	0-6 years	Female	Single	No Income	housewife	Sub-Urban	160	100	24.97	13	81	62	60	Hypertension	Normal	Normal	Normal	Normal	Not Smoking	Normal	Depression	6	5	5	No	No	No	No	No	No	No	No	No	No	No	No	No	No	No	Yes	No	No	No	No
483	80524	Normal	68	60-74	6	0-6 years	Male	Married	< monthly minimum wage	labour	Sub-Urban	160	90	20.25	0				Hypertension	Normal				Smoking	Normal	Normal	4	9	7	No	No	No	No	No	No	No	No	No	No	No	No	No	No	No	No	No	Yes	No	No
484	80526	Normal	62	60-74	6	0-6 years	Male	Married	≥ monthly minimum wage	profesional	Sub-Urban	100	70	19.95	0	86	97	53	Normal	Normal	Normal	Normal	Normal	Smoking	Normal	Normal	1	0	10	No	No	No	No	No	No	No	Yes	No	No	No	No	No	No	No	No	No	Yes	No	No
485	80527	Dementia	74	60-74	3	0-6 years	Female	Single	No Income	notworking	Sub-Urban	130	80	18.88	1				Normal	Normal				Not Smoking	Normal	Normal	1	10	5	No	No	No	No	No	No	No	No	No	No	No	No	No	No	No	Yes	No	No	No	No
486	80529	Normal	60	60-74	6	0-6 years	Female	Married			Sub-Urban	140	90	24.78	0				Normal	Normal					Normal	Normal	1	2	9	No	No	No	No	No	No	No	No	No	No	No	No	No	No	No	Yes	No	Yes	No	Yes
487	80530	Normal	78	>75	16	0-6 years	Male	Married			Sub-Urban	180	110	21.16	1				Hypertension	Normal					Normal	Normal	1	0	4	Yes	No	No	No	No	No	No	No	No	No	No	No	No	No	No	No	No	No	No	No
488	80531	Dementia	82	>75		0-6 years	Male	Married			Sub-Urban	180	100	22.35	6				Hypertension	Normal					Normal	Normal	4	0	2	No	No	No	No	Yes	No	No	No	No	No	Yes	No	No	Yes	No	No	No	No	No	No
489	80532	Dementia	74	60-74	5	> 7 years	Female	Married	No Income	notworking	Sub-Urban	160	100	20.25	5				Hypertension	Normal					Normal	Normal	3	2	4	No	No	No	No	Yes	No	No	No	No	Yes	No	No	Yes	Yes	No	Yes	No	Yes	No	No
490	80533	Dementia	83	>75	6	0-6 years	Female	Single	No Income	notworking	Sub-Urban	130	90	21.03	1				Normal	Normal				Not Smoking	Normal	Normal	4	2	2	No	No	No	No	No	No	No	No	No	No	No	No	No	Yes	No	Yes	No	Yes	Yes	No
491	80534	Normal	61	60-74	6	0-6 years	Male	Married	No Income	notworking	Sub-Urban	150	90	22.58	6				Hypertension	Normal				Smoking	Normal	Normal	0	0	10	No	No	No	No	No	No	No	No	No	No	No	No	No	No	No	No	No	No	No	No
492	80535	Normal	64	60-74	12	0-6 years	Male	Married	≥ monthly minimum wage	profesional	Sub-Urban	220	110	30.07	3				Hypertension	Obesitas				Smoking	Normal	Normal	0	0	10	No	No	No	No	No	No	No	No	No	No	No	No	Yes	No	No	Yes	No	Yes	No	Yes
493	80536	Dementia	73	60-74	6	0-6 years	Female	Single	No Income	notworking	Sub-Urban	180	110	20.78	9				Hypertension	Normal				Smoking	Normal	Normal	7	13	1	Yes	No	No	No	No	Yes	No	No	No	No	No	No	Yes	No	Yes	Yes	No	Yes	Yes	No
494	80537	Dementia	60	60-74	6	0-6 years	Female	Married	No Income	housewife	Sub-Urban	140	98	29.73	6	169	373	41	Hypertension	Overweight	Diabetes	High Risk	Normal	Not Smoking	Normal	Normal	5	2	5	No	No	No	No	No	No	No	No	No	No	Yes	No	No	No	No	Yes	No	Yes	No	Yes
495	80538	Normal	67	60-74	6	0-6 years	Female	Single	≥ monthly minimum wage	profesional	Sub-Urban	154	72	25.57	6				Hypertension	Overweight				Not Smoking	Normal	Normal	1	0	9	No	No	No	Yes	No	Yes	No	No	No	No	No	No	No	No	No	Yes	No	Yes	Yes	Yes
496	80539	Dementia	65	60-74	1	0-6 years	Female	Married	No Income	notworking	Sub-Urban	178	98	16.87	8				Hypertension	Underweight					Normal	Normal	5	2	5	No	No	No	No	Yes	No	No	No	No	No	Yes	No	Yes	No	Yes	Yes	No	Yes	Yes	No
497	80540	Normal	64	60-74	6	0-6 years	Male	Married	No Income	notworking	Sub-Urban	134	74	14.45	6	92	140	64	Normal	Underweight	Normal	Normal	Normal	Smoking	Normal	Normal	0	0	9	Yes	No	No	No	No	No	No	No	No	No	Yes	No	Yes	No	No	Yes	No	No	No	No
498	80541	Normal	61	60-74	6	0-6 years	Female	Married	No Income	notworking	Sub-Urban	190	130	18.63	1	58	87	41	Hypertension	Normal	Normal	Normal	Normal		Normal	Normal	0	5	9	No	No	No	No	No	No	No	No	No	No	No	No	Yes	No	No	No	No	Yes	Yes	No
499	80543	Dementia	63	60-74	2	0-6 years	Female	Married	No Income	housewife	Sub-Urban	198	100	17.19	12	96	48	65	Hypertension	Underweight	Normal	Normal	Normal	Not Smoking	Normal	Depression	3	19	4	No	No	No	No	No	No	No	No	No	No	No	No	No	No	No	Yes	No	No	Yes	No
500	80544	Normal	63	60-74	6	0-6 years	Male	Married	< monthly minimum wage	labour	Sub-Urban	130	100	22.77	2				Hypertension	Normal				Smoking	Normal	Normal	1	0	9	Yes	No	No	No	Yes	No	No	No	No	No	Yes	No	Yes	No	No	Yes	No	Yes	Yes	No
501	80545	Dementia	73	60-74	5	> 7 years	Female	Married	No Income	notworking	Sub-Urban	140	90			110	130	53	Normal		Normal	Normal	Normal		Normal		7	18	2	No	No	No	No	No	No	No	No	No	No	No	No	No	No	Yes	No	No	Yes	Yes	No
502	80546	Dementia	83	>75		0-6 years	Female				Sub-Urban	130	80	18.38					Normal	Underweight					Normal		7	8	2	No	No	No	No	No	No	No	No	No	No	No	No	Yes	No	No	No	No	Yes	No	No
503	80548	Normal	68	60-74	6	0-6 years	Male	Married	≥ monthly minimum wage	profesional	Sub-Urban	150	110	22.83	5				Hypertension	Normal				Smoking	Normal	Normal	0	2	8	No	No	Yes	Yes	Yes	No	No	No	No	No	Yes	No	Yes	No	No	Yes	No	Yes	Yes	Yes
504	80550	Normal	63	60-74	6	0-6 years	Female	Married	No Income	housewife	Sub-Urban	150	100	26.48	5				Hypertension	Overweight				Not Smoking	Normal	Normal	5	4	9	Yes	No	No	No	No	No	No	No	No	Yes	No	No	No	No	No	Yes	No	Yes	Yes	No
505	80553	Normal	62	60-74	9	0-6 years	Male	Married	≥ monthly minimum wage	profesional	Sub-Urban	180	130	26.45	1	134	798	23	Hypertension	Overweight	Diabetes	High Risk	High Risk	Smoking	Normal	Normal	2	0	10	Yes	No	Yes	No	Yes	Yes	No	No	No	No	No	No	No	No	Yes	Yes	No	Yes	Yes	No
506	80554	Normal	65	60-74	6	0-6 years	Female	Single	< monthly minimum wage	labour	Sub-Urban	160	120	21.91	1				Hypertension	Normal				Not Smoking	Normal	Normal	1	0	10	No	No	No	No	No	No	No	No	No	No	No	No	No	No	No	No	No	Yes	Yes	No
507	80555	Normal	63	60-74	6	0-6 years	Female	Single	No Income	notworking	Sub-Urban	130	70	20.48	6	104	175	38	Normal	Normal	Normal	Normal	High Risk	Not Smoking	Normal	Normal	1	0	8	Yes	No	No	No	Yes	Yes	No	No	No	No	No	No	Yes	No	No	Yes	No	Yes	Yes	Yes
508	80556	Normal	65	60-74	6	> 7 years	Male	Married	≥ monthly minimum wage	profesional	Sub-Urban	140	110	24.84	2	249	188	44	Hypertension	Normal	Diabetes	Normal	Normal	Not Smoking	Normal	Normal	4	5	9	Yes	No	No	No	No	No	No	No	No	No	No	No	Yes	No	No	No	No	Yes	Yes	No
509	80557	Normal			6		Male	Married	No Income	notworking	Sub-Urban	160	80	22.51	4				Hypertension	Normal				Smoking	stroke	Normal	0	1	10	Yes	No	Yes	No	Yes	Yes	No	No	No	No	Yes	No	Yes	No	No	Yes	No	Yes	No	No
510	80558	Normal	63	60-74	1		Female	Single	No Income	notworking	Sub-Urban	140	90	14.27	3	105	93	40	Normal	Underweight	Normal	Normal	Normal		Normal	Normal	1	6	9	No	No	No	No	No	No	No	No	No	Yes	Yes	No	No	No	No	Yes	No	Yes	Yes	Yes
511	80560	Normal	77	>75	12	> 7 years	Female	Single	No Income	housewife	Sub-Urban	188	110	24.3	6				Hypertension	Normal					Normal	Normal	5	7	10	No	No	No	No	No	No	No	No	No	No	No	No	No	No	No	Yes	No	Yes	No	No
512	80561	Normal	65	60-74	9	> 7 years	Female	Married	No Income	housewife	Sub-Urban	100	70	32.61	7	90	66	76	Normal	Obesitas	Normal	Normal	Normal	Not Smoking	Normal	Normal	1	2	9	Yes	No	No	Yes	No	No	No	No	No	Yes	Yes	No	No	No	No	Yes	No	Yes	Yes	No
513	80562	Normal	68	60-74	12	> 7 years	Male	Married	≥ monthly minimum wage	profesional	Sub-Urban	130	100	32.77	4	125	304	60	Hypertension	Obesitas	Normal	High Risk	Normal	Smoking	Normal	Normal	1	10	10	Yes	No	No	No	Yes	No	No	No	No	No	Yes	No	No	No	No	Yes	No	Yes	No	No
514	80563	Normal	67	60-74	12	> 7 years	Male	Married	≥ monthly minimum wage	profesional	Sub-Urban	120	70	23.48	0	83	68	46	Normal	Normal	Normal	Normal	Normal	Not Smoking	Normal	Normal	2	0	9	Yes	No	No	No	No	No	No	No	No	Yes	No	No	Yes	No	No	Yes	No	Yes	Yes	No
515	80564	Normal	78	>75	12	> 7 years	Female	Single	≥ monthly minimum wage	housewife	Sub-Urban	150	90	23.69	0	154	148	63	Hypertension	Normal	Diabetes	Normal	Normal	Not Smoking	Normal	Normal	0	0	9	Yes	No	No	No	No	Yes	No	No	No	Yes	Yes	No	No	No	No	Yes	No	Yes	Yes	Yes
516	80565	Normal	68	60-74	9	> 7 years	Female	Married	No Income	housewife	Sub-Urban	210	110	32.93	2	179	103	63	Hypertension	Obesitas	Diabetes	Normal	Normal	Not Smoking	Normal	Normal	0	1	9	Yes	No	No	No	Yes	No	No	No	No	Yes	Yes	No	Yes	No	No	Yes	No	Yes	No	Yes
517	80566	Normal	63	60-74	8	> 7 years	Female	Married	No Income	housewife	Sub-Urban	120	80	20.63	1	89	113	66	Normal	Normal	Normal	Normal	Normal	Not Smoking	Normal	Normal	0	1	9	No	No	No	No	Yes	No	No	No	No	Yes	No	No	No	No	No	Yes	No	Yes	Yes	Yes
518	80567	Dementia	74	60-74	9	> 7 years	Male	Married	≥ monthly minimum wage	profesional	Sub-Urban	150	80	23.04	4				Hypertension	Normal					Normal	Normal	2	1	7	Yes	No	No	No	No	No	No	No	No	Yes	Yes	No	Yes	No	No	Yes	No	Yes	Yes	No
519	80568	Normal	64	60-74	9	> 7 years	Female	Married	No Income	housewife	Sub-Urban	130	80	25.67	0	127	175	68	Normal	Overweight	Diabetes	Normal	Normal	Not Smoking	Normal	Normal	2	0	9	Yes	No	No	No	No	No	No	No	No	No	No	No	No	No	No	Yes	No	Yes	Yes	Yes
520	80569	Dementia	66	60-74	9	> 7 years	Male	Married	≥ monthly minimum wage	profesional	Sub-Urban	150	80	24.92	2	175	97	43	Hypertension	Normal	Diabetes	Normal	Normal	Smoking	Normal	Normal	6	0	9	Yes	No	No	No	No	No	No	No	No	No	Yes	No	Yes	No	No	Yes	No	Yes	Yes	Yes
521	80570	Normal	66	60-74	6	0-6 years	Female	Married	No Income	housewife	Sub-Urban	150	90	32.53	0	110	149	57	Hypertension	Obesitas	Normal	Normal	Normal	Not Smoking	Normal	Normal	0	0	9	Yes	No	No	No	No	No	No	No	No	No	Yes	No	Yes	No	No	Yes	No	Yes	Yes	Yes
522	80571	Normal	72	60-74	6	0-6 years	Male	Married	≥ monthly minimum wage	profesional	Sub-Urban	140	80	23.06	0	97	583	29	Normal	Normal	Normal	High Risk	High Risk	Not Smoking	Normal	Normal	0	0	9	Yes	No	Yes	No	No	No	No	No	No	No	Yes	No	Yes	No	No	Yes	No	Yes	Yes	Yes
523	80572	Normal	66	60-74	9	> 7 years	Female	Married	≥ monthly minimum wage	profesional	Sub-Urban	120	80	30.29	0	95	90	65	Normal	Obesitas	Normal	Normal	Normal	Smoking	Normal	Normal	1	0	9	Yes	No	No	Yes	Yes	Yes	No	No	No	Yes	No	No	Yes	No	No	Yes	No	Yes	Yes	Yes
524	80573	Normal	68	60-74	9	> 7 years	Male	Married	≥ monthly minimum wage	profesional	Sub-Urban	140	80	23.67	2	89	71	56	Normal	Normal	Normal	Normal	Normal	Smoking	Normal	Normal	4	6	9	No	No	No	No	Yes	No	No	No	No	Yes	Yes	No	No	No	No	Yes	No	Yes	No	No
525	80574	Normal	69	60-74	7	> 7 years	Female	Married	≥ monthly minimum wage	housewife	Sub-Urban	150	80	27.6	2	98	150	51	Hypertension	Overweight	Normal	Normal	Normal	Smoking	Normal	Normal	1	1	10	No	No	No	Yes	No	No	No	No	No	Yes	No	No	No	No	No	Yes	No	Yes	No	Yes
526	80575	Normal	60	60-74	9	> 7 years	Female	Married	No Income	housewife	Sub-Urban			29.36	3	92	92	45		Overweight	Normal	Normal	Normal		Normal	Normal	0	0	9	No	No	No	Yes	No	No	No	No	No	Yes	No	No	No	No	No	Yes	No	Yes	Yes	Yes
527	80576	Dementia	69	60-74	9	> 7 years	Male	Married	≥ monthly minimum wage	profesional	Sub-Urban	130	80	21.47	1	98	117	36	Normal	Normal	Normal	Normal	High Risk	Smoking	Normal	Normal	4	1	7	Yes	No	No	Yes	Yes	No	No	No	No	No	Yes	No	Yes	No	No	Yes	No	Yes	Yes	Yes
528	80577	Normal	66	60-74	9	> 7 years	Female	Married	No Income	housewife	Sub-Urban	180	100	23.94	3	95	148	54	Hypertension	Normal	Normal	Normal	Normal		Normal	Normal	3	0	9	Yes	No	No	No	Yes	No	No	No	No	Yes	Yes	No	Yes	No	No	Yes	No	Yes	Yes	No
529	80578	Normal	65	60-74	9	> 7 years	Male	Married	≥ monthly minimum wage	profesional	Sub-Urban	160	90	27.3	2	85	115	49	Hypertension	Overweight	Normal	Normal	Normal	Smoking	Normal	Normal	3	1	9	No	No	Yes	No	No	No	No	No	No	Yes	No	Yes	Yes	No	No	Yes	No	Yes	No	Yes
530	80579	Normal	70	60-74	6	0-6 years	Female	Single	No Income	notworking	Sub-Urban	130	90	20.46	0				Normal	Normal				Not Smoking	Normal	Normal	4	3	8	Yes	No	No	No	No	No	No	No	No	Yes	No	No	Yes	No	No	Yes	No	Yes	No	No
531	80580	Normal	72	60-74	12	> 7 years	Male	Married	≥ monthly minimum wage	profesional	Sub-Urban	110	70	22.5	2	107	171	50	Normal	Normal	Normal	Normal	Normal	Smoking	Normal	Normal	1	0	10	Yes	No	No	No	No	No	No	No	No	No	Yes	No	Yes	No	No	Yes	No	Yes	No	No
532	80581	Normal	83	>75	6	0-6 years	Male	Married	≥ monthly minimum wage	profesional	Sub-Urban	90	60	19.9	2	82	89	39	Normal	Normal	Normal	Normal	High Risk	Not Smoking	Normal	Normal	3	4	7	Yes	No	No	No	No	No	No	No	No	No	No	No	No	No	No	Yes	No	No	No	No
533	80582	Normal	70	60-74	9	> 7 years	Male	Single	≥ monthly minimum wage	profesional	Sub-Urban	130	70	28.38	3				Normal	Overweight				Smoking	Normal	Normal	2	0	10	Yes	No	No	Yes	No	No	No	No	No	No	Yes	Yes	Yes	No	No	Yes	No	Yes	No	No
534	80583	Normal	71	60-74	9	> 7 years	Male	Married	≥ monthly minimum wage	profesional	Sub-Urban	130	80	27.55	2	105	78	47	Normal	Overweight	Normal	Normal	Normal	Smoking	Normal	Normal	0	0	9	Yes	No	Yes	No	Yes	No	No	No	No	Yes	Yes	No	No	No	Yes	Yes	No	Yes	Yes	No
535	80584	Normal	64	60-74	12	> 7 years	Female	Single	≥ monthly minimum wage	profesional	Sub-Urban	160	90	27.02	2	92	94	73	Hypertension	Overweight	Normal	Normal	Normal	Not Smoking	Normal	Normal	0	0	9	Yes	No	No	No	Yes	No	No	No	No	Yes	Yes	No	Yes	Yes	No	No	No	Yes	Yes	Yes
536	80585	Normal	70	60-74	9	> 7 years	Female	Single	No Income	housewife	Sub-Urban	170	90	22.84	2				Hypertension	Normal					Normal	Normal	3	2	10	No	No	No	No	No	No	No	No	No	No	No	No	No	No	Yes	Yes	No	Yes	Yes	Yes
537	80586	Normal	69	60-74	6	0-6 years	Female	Single	No Income	housewife	Sub-Urban	120	70	24.39	2	88	124	54	Normal	Normal	Normal	Normal	Normal	Not Smoking	Normal	Normal	4	0	8	Yes	No	No	No	Yes	No	No	No	No	Yes	No	No	Yes	Yes	Yes	Yes	No	Yes	Yes	Yes
538	80587	Normal	67	60-74	12	> 7 years	Male	Single	≥ monthly minimum wage	profesional	Sub-Urban	130	80	27.53	1	109	146	41	Normal	Overweight	Normal	Normal	Normal	Smoking	Normal	Normal	0	1	9	No	Yes	Yes	No	No	No	No	No	No	No	Yes	No	Yes	No	No	No	No	Yes	Yes	Yes
539	80588	Normal	64	60-74	6	0-6 years	Male	Married	< monthly minimum wage	profesional	Sub-Urban	170	90	24.28	5	90	83	74	Hypertension	Normal	Normal	Normal	Normal	Smoking	Normal	Normal	1	1	10	No	No	No	No	Yes	No	No	No	No	No	No	No	Yes	No	Yes	Yes	No	Yes	Yes	Yes
540	80589	Normal	73	60-74	6	0-6 years	Male	Single	≥ monthly minimum wage	profesional	Sub-Urban	180	100	29.43	1	92	209	33	Hypertension	Overweight	Normal	High Risk	High Risk	Smoking	Normal	Normal	0	1	9	Yes	No	No	Yes	No	No	No	No	No	Yes	Yes	No	Yes	No	No	Yes	No	Yes	Yes	Yes
541	80590	Normal	76	>75	3	0-6 years	Female	Married	≥ monthly minimum wage	housewife	Sub-Urban	180	70	31.31	2	89	48	72	Hypertension	Obesitas	Normal	Normal	Normal	Not Smoking	Normal	Normal	2	4	8	No	No	No	No	No	Yes	No	No	No	Yes	No	No	Yes	No	No	Yes	No	Yes	No	Yes
542	80591	Normal	66	60-74	6	0-6 years	Male	Married	≥ monthly minimum wage	profesional	Sub-Urban	130	70	27.89	1				Normal	Overweight				Not Smoking	Normal	Normal	0	0	8	No	No	No	No	Yes	No	No	No	No	No	Yes	No	No	No	No	Yes	No	Yes	Yes	No
543	80592	Normal	73	60-74	6	0-6 years	Male	Married	≥ monthly minimum wage	profesional	Sub-Urban	160	100	25.04	3	92	156	50	Hypertension	Normal	Normal	Normal	Normal	Not Smoking	Normal	Normal	5	0	9	Yes	No	No	No	Yes	No	No	No	No	Yes	Yes	Yes	Yes	No	No	Yes	No	Yes	Yes	No
544	80593	Dementia	72	60-74	6	0-6 years	Female	Married	No Income	housewife	Sub-Urban	120	80	22.82	0				Normal	Normal				Not Smoking	Normal	Normal	8	22	1	Yes	No	No	No	No	No	No	No	No	No	No	No	No	No	No	No	No	Yes	No	No
545	80594	Dementia	77	>75	6	0-6 years	Male	Married	≥ monthly minimum wage	profesional	Sub-Urban	110	60	17.68	6				Normal	Underweight				Smoking	Normal	Normal	6	7	5	Yes	No	No	No	No	No	No	No	No	Yes	Yes	No	Yes	No	No	Yes	No	Yes	Yes	No
546	80595	Normal	71	60-74	8	> 7 years	Female	Married	No Income	housewife	Sub-Urban	140	70	24.38	0	94	229	46	Normal	Normal	Normal	High Risk	Normal	Not Smoking	Normal	Normal	0	0	10	Yes	No	No	No	Yes	No	No	No	No	Yes	Yes	No	Yes	No	No	Yes	No	Yes	Yes	Yes
547	80596	Normal			9	> 7 years	Female	Married			Sub-Urban	150	100	29.41	3	98	240	52	Hypertension	Overweight	Normal	High Risk	Normal		Normal	Normal	0	0	10	Yes	No	No	No	Yes	No	No	No	No	Yes	No	No	Yes	No	No	Yes	No	Yes	No	No
548	80597	Normal	73	60-74	6	0-6 years	Female	Single	No Income	housewife	Sub-Urban	170	90	29.18	13	96	198	48	Hypertension	Overweight	Normal	Normal	Normal	Not Smoking	Normal	Depression	4	0	6	No	No	No	No	No	No	No	No	No	Yes	No	No	Yes	No	No	Yes	No	Yes	No	No
549	80598	Dementia	69	60-74	15	> 7 years	Male	Married	< monthly minimum wage	profesional	Sub-Urban				12	97	94	42			Normal	Normal	Normal	Smoking	stroke	Depression	6	24	10	No	No	No	No	No	No	No	No	No	No	No	No	No	No	Yes	No	No	Yes	No	No
550	80599	Dementia	72	60-74	9	> 7 years	Male	Married	≥ monthly minimum wage	profesional	Sub-Urban	130	80	23.67	3	100	223	38	Normal	Normal	Normal	High Risk	High Risk	Smoking	Normal	Normal	2		7	Yes	No	No	No	Yes	No	No	No	No	Yes	No	No	Yes	No	No	No	No	Yes	Yes	No
551	80600	Normal	69	60-74	6	0-6 years	Female	Single	No Income	housewife	Sub-Urban	160	80	31.26	3				Hypertension	Obesitas				Not Smoking	Normal	Normal	7	9	10	Yes	No	No	No	Yes	No	No	No	No	Yes	Yes	No	Yes	No	No	Yes	No	Yes	Yes	Yes
552	80601	Normal	66	60-74	6	0-6 years	Male	Married	≥ monthly minimum wage	profesional	Sub-Urban	130	80	25.23	0	87	119	40	Normal	Overweight	Normal	Normal	Normal	Smoking	Normal	Normal	4	0	9	Yes	No	No	No	No	No	No	No	No	No	Yes	No	No	No	No	Yes	No	Yes	Yes	Yes
553	80602	Normal	61	60-74	12	> 7 years	Female	Married	≥ monthly minimum wage	profesional	Sub-Urban	100	60	24.53	0	80	123	51	Normal	Normal	Normal	Normal	Normal	Not Smoking	Normal	Normal	0	0	10	Yes	No	No	No	No	No	No	No	No	Yes	No	No	No	No	No	No	No	Yes	Yes	No
554	80603	Normal	70	60-74	12	> 7 years	Male	Married	≥ monthly minimum wage	profesional	Sub-Urban	140	70		1				Hypertension					Smoking	Normal	Normal	1	6	9	Yes	No	No	No	No	Yes	No	No	No	Yes	No	No	Yes	No	Yes	Yes	No	Yes	Yes	Yes
555	80604	Normal	60	60-74	12	> 7 years	Female	Single	No Income	notworking	Sub-Urban	190	100	29.37	0	205	364	33	Hypertension	Overweight	Diabetes	High Risk	High Risk	Not Smoking	Normal	Normal	1	0	9	Yes	No	No	No	No	No	No	No	No	Yes	Yes	No	Yes	No	No	Yes	No	Yes	Yes	Yes
556	80605	Normal	65	60-74	12	> 7 years	Male	Married	≥ monthly minimum wage	profesional	Sub-Urban	130	80	22.66	1	98	132	58	Normal	Normal	Normal	Normal	Normal	Smoking	Normal	Normal	2	2	10	Yes	No	No	Yes	Yes	Yes	No	No	No	No	Yes	No	Yes	No	Yes	Yes	No	Yes	Yes	Yes
557	80606	Normal	73	60-74	6	0-6 years	Female	Single	≥ monthly minimum wage	housewife	Sub-Urban	140	80	23.87	5	103	136	57	Normal	Normal	Normal	Normal	Normal	Not Smoking	Normal	Normal	3	0	8	Yes	No	No	No	No	No	No	No	No	Yes	No	No	Yes	No	No	Yes	No	Yes	No	No
558	80607	Normal	62	60-74	9	> 7 years	Female	Married	No Income	housewife	Sub-Urban	170	90	23.25	1	89	65	74	Hypertension	Normal	Normal	Normal	Normal	Not Smoking	Normal	Normal	0	0	10	Yes	No	No	No	No	No	No	No	No	Yes	Yes	No	Yes	No	No	Yes	No	Yes	Yes	Yes
559	80608	Normal	61	60-74	6	0-6 years	Female	Married	No Income	housewife	Sub-Urban	140	80	24.99	0				Normal	Normal				Not Smoking	Normal	Normal	1	0	9	Yes	No	No	No	No	No	No	No	No	Yes	Yes	No	Yes	No	No	Yes	No	Yes	Yes	Yes
560	80609	Normal	72	60-74	9	> 7 years	Female	Single	No Income	housewife	Sub-Urban	120	80	25.13	1				Normal	Overweight					Normal	Normal	0	0	9	Yes	No	No	No	Yes	No	No	No	Yes	Yes	Yes	No	Yes	No	Yes	Yes	No	Yes	Yes	Yes
561	80610	Normal	79	>75	0	0-6 years	Female	Single	No Income	housewife	Sub-Urban	130	70	23.83	1	93	176	48	Normal	Normal	Normal	Normal	Normal	Not Smoking	Normal	Normal	1	0	7	No	No	No	Yes	Yes	No	No	No	No	Yes	No	No	Yes	No	No	No	No	Yes	No	Yes
562	80611	Dementia	66	60-74	9	> 7 years	Female	Single	No Income	housewife	Sub-Urban	150	90	30.71	0	94	228	47	Hypertension	Obesitas	Normal	High Risk	Normal	Not Smoking	Normal	Normal	3	0	8	Yes	No	No	No	No	No	No	No	No	No	No	No	No	No	No	Yes	No	Yes	Yes	Yes
563	80612	Dementia	63	60-74	8	> 7 years	Female	Married	No Income	housewife	Sub-Urban	122	78	16.41	2				Normal	Underweight				Smoking	Normal	Normal	4	2	8	No	No	No	No	No	No	No	No	No	Yes	No	No	Yes	No	No	Yes	No	Yes	Yes	No
564	80614	Normal	71	60-74			Female	Single	≥ monthly minimum wage	profesional	Sub-Urban	130	90	21.91	1	206	99	51	Normal	Normal	Diabetes	Normal	Normal	Not Smoking	Normal	Normal	0	4	10	Yes	No	No	No	No	No	No	No	No	Yes	No	No	Yes	Yes	Yes	Yes	Yes	No	Yes	Yes
565	80615	Normal	78	>75	6	0-6 years	Female	Single	≥ monthly minimum wage	profesional	Sub-Urban	160	90	20.87	3	77	107	47	Hypertension	Normal	Normal	Normal	Normal	Not Smoking	Normal	Normal	6	2	9	No	No	No	No	Yes	No	No	No	No	Yes	No	No	Yes	No	No	Yes	No	Yes	Yes	Yes
566	80616	Normal	71	60-74	12	> 7 years	Male	Married	< monthly minimum wage	profesional	Sub-Urban	160	130	20.23	2				Hypertension	Normal				Smoking	Normal	Normal	1	0	9	No	No	No	No	Yes	No	No	No	No	Yes	No	No	No	No	No	No	No	Yes	Yes	No
567	80617	Normal	64	60-74	6	0-6 years	Female	Single	< monthly minimum wage	profesional	Sub-Urban	100	70	22.06	5	88	154	60	Normal	Normal	Normal	Normal	Normal	Not Smoking	Normal	Normal	0	0	8	Yes	No	No	No	No	No	No	No	No	Yes	No	No	No	No	No	Yes	No	Yes	No	Yes
568	80618	Normal	67	60-74	6	0-6 years	Female	Married	No Income	housewife	Sub-Urban	180	100	37.44	5				Hypertension	Obesitas				Not Smoking	Normal	Normal	0	1	7	Yes	No	No	No	No	No	No	No	No	Yes	No	No	Yes	No	No	No	No	Yes	Yes	Yes
569	80619	Normal			6	0-6 years	Female	Single	No Income	housewife	Sub-Urban	120	70	27.63	7	97	147	50	Normal	Overweight	Normal	Normal	Normal	Not Smoking	Normal	Normal	0	0	9	Yes	No	No	No	No	Yes	No	No	No	Yes	No	No	Yes	No	No	Yes	No	Yes	Yes	Yes
570	80620	Normal	60	60-74	16	> 7 years	Female	Married	≥ monthly minimum wage	profesional	Sub-Urban	120	86	25.56	2	84	96	67	Normal	Overweight	Normal	Normal	Normal		Normal	Normal	0	0	9	Yes	No	No	No	No	Yes	No	No	No	Yes	No	No	Yes	No	Yes	Yes	No	Yes	Yes	Yes
571	80621	Normal	67	60-74	12	> 7 years	Male	Single	< monthly minimum wage	profesional	Sub-Urban	170	80	28.76	4	109	135	40	Hypertension	Overweight	Normal	Normal	Normal	Smoking	Normal	Normal	0	0	9	No	No	No	No	Yes	Yes	No	No	No	Yes	Yes	No	Yes	No	Yes	Yes	No	Yes	Yes	Yes
572	80622	Normal	61	60-74	6	0-6 years	Female	Single	No Income	housewife	Sub-Urban	160	100	29.79	2	97	178	45	Hypertension	Overweight	Normal	Normal	Normal	Not Smoking	Normal	Normal	0	0	7	No	No	No	No	No	Yes	No	No	No	Yes	No	Yes	Yes	No	Yes	Yes	No	Yes	Yes	Yes
573	80623	Normal	68	60-74	6	0-6 years	Female	Single	No Income	housewife	Sub-Urban	230	100	20.49	5	123	128	77	Hypertension	Normal	Normal	Normal	Normal	Not Smoking	Normal	Normal	0	2	9	Yes	No	No	No	Yes	No	No	No	No	Yes	No	No	Yes	No	No	Yes	No	Yes	Yes	Yes
574	80624	Normal	66	60-74	6	0-6 years	Female	Married	No Income	housewife	Sub-Urban	178	94	28.85					Hypertension	Overweight				Not Smoking	Normal		0	0	9	No	No	No	Yes	No	No	No	No	No	Yes	No	No	No	No	No	Yes	No	Yes	Yes	Yes
575	80625	Normal	79	>75	3	0-6 years	Female	Single	No Income	housewife	Sub-Urban	90	50	22.6	1				Normal	Normal				Not Smoking	Normal	Normal	1	2	8	No	No	No	No	Yes	No	No	No	No	Yes	No	No	No	No	No	Yes	No	Yes	Yes	No
576	80626	Normal	86	>75	11	> 7 years	Male	Single	< monthly minimum wage	profesional	Sub-Urban	170	90	20.51	3				Hypertension	Normal				Smoking	Normal	Normal	0	0	9	Yes	No	No	No	No	Yes	No	No	No	No	Yes	No	No	No	No	Yes	No	Yes	No	No
577	80627	Normal	63	60-74	12	> 7 years	Male	Married	≥ monthly minimum wage	profesional	Sub-Urban	100	60	24.86	5				Normal	Normal				Not Smoking	Normal	Normal	0	0	10	No	No	No	Yes	Yes	No	No	No	No	No	No	No	Yes	No	No	No	No	Yes	Yes	No
578	80628	Normal	67	60-74	15	> 7 years	Male	Married	≥ monthly minimum wage	profesional	Sub-Urban	170	110	29	4	116	232	41	Hypertension	Overweight	Normal	High Risk	Normal	Smoking	Normal	Normal	0	0	10	Yes	No	No	No	Yes	No	No	No	No	Yes	Yes	No	Yes	No	No	Yes	No	Yes	Yes	No
579	80629	Normal	67	60-74	9	> 7 years	Female	Married	No Income	housewife	Sub-Urban	150	100	26.54	3				Hypertension	Overweight				Not Smoking	Normal	Normal	3	0	9	Yes	No	No	No	Yes	No	No	No	No	Yes	Yes	No	Yes	No	No	Yes	No	Yes	No	Yes
580	80630	Normal	68	60-74	6	0-6 years	Female	Married	≥ monthly minimum wage	profesional	Sub-Urban	150	80	24.12	4	95	225	45	Hypertension	Normal	Normal	High Risk	Normal	Not Smoking	Normal	Normal	2	0	10	Yes	No	No	No	Yes	No	No	No	No	Yes	No	No	Yes	No	Yes	Yes	No	Yes	Yes	Yes
581	80631	Normal	75	>75	9	> 7 years	Male	Married	< monthly minimum wage	profesional	Sub-Urban	150	80	24.44	2	447	177	39	Hypertension	Normal	Diabetes	Normal	High Risk	Smoking	Normal	Normal	0	1	10	No	No	No	No	Yes	No	No	No	No	No	Yes	No	No	No	No	Yes	No	Yes	Yes	Yes
582	80632	Normal	78	>75	12	> 7 years	Male	Married	< monthly minimum wage	profesional	Sub-Urban	150	100	17.96	1				Hypertension	Underweight				Smoking	Normal	Normal	0	0	10	Yes	No	No	Yes	Yes	No	No	No	No	No	Yes	No	No	No	No	Yes	No	Yes	No	Yes
583	80633	Normal	67	60-74	6	0-6 years	Male	Married	≥ monthly minimum wage	profesional	Sub-Urban	130	80	28.97	3	92	119	47	Normal	Overweight	Normal	Normal	Normal	Not Smoking	Normal	Normal	0	0	8	No	No	No	No	No	Yes	No	No	No	Yes	No	No	No	No	Yes	Yes	No	Yes	Yes	No
584	80634	Normal	68	60-74	12	> 7 years	Male	Married	≥ monthly minimum wage	profesional	Sub-Urban	140	90	23.22	5				Normal	Normal				Smoking	Normal	Normal	0	1	10	No	No	Yes	No	No	No	No	No	No	No	Yes	No	Yes	No	No	No	No	Yes	No	Yes
585	80635	Normal	69	60-74	12	> 7 years	Male	Married	≥ monthly minimum wage	profesional	Sub-Urban	120	70	22.58	2	89	105	50	Normal	Normal	Normal	Normal	Normal	Not Smoking	Normal	Normal	3	3	9	Yes	No	No	Yes	No	No	No	No	No	No	Yes	No	Yes	No	No	Yes	No	Yes	Yes	Yes
586	80636	Dementia	66	60-74	8	> 7 years	Male	Married	≥ monthly minimum wage	profesional	Sub-Urban	170	90	27.49					Hypertension	Overweight				Smoking	Normal		0	0	7	Yes	No	No	No	No	Yes	No	No	No	No	No	No	Yes	No	No	Yes	No	Yes	Yes	Yes
587	80637	Normal	64	60-74	12	> 7 years	Male	Married	≥ monthly minimum wage	profesional	Sub-Urban			23.3	6					Normal				Not Smoking	Normal	Normal	2	9	10	No	No	No	No	No	No	No	No	No	No	No	No	No	No	Yes	Yes	No	Yes	Yes	No
588	80638	Normal	73	60-74		0-6 years	Female				Sub-Urban	110	60	17.65	1				Normal	Underweight					Normal	Normal	0	0	8	No	No	No	No	No	No	No	No	No	No	No	No	No	No	No	No	No	Yes	No	Yes
589	80639	Normal	68	60-74		> 7 years	Female				Sub-Urban	160	90	28.89	7				Hypertension	Overweight					Normal	Normal	0	3	8	Yes	No	No	No	No	No	No	No	No	No	No	No	No	No	No	Yes	No	Yes	No	No
590	80640	Normal	62	60-74	12	0-6 years	Male				Sub-Urban	110	70	28.34	2	112	100	42	Normal	Overweight	Normal	Normal	Normal		Normal	Normal	3	11	10	Yes	Yes	Yes	No	No	Yes	No	No	Yes	Yes	No	No	No	No	Yes	Yes	No	Yes	Yes	No
591	80641	Normal	65	60-74	4	0-6 years	Female	Single	< monthly minimum wage	profesional	Sub-Urban	160	80	26.65	7				Hypertension	Overweight				Not Smoking	Normal	Normal	0	5	9	No	No	No	No	No	No	No	No	No	No	No	No	No	No	No	Yes	No	Yes	No	Yes
592	80642	Normal	77	>75		0-6 years	Female				Sub-Urban	140	90	20.78	3				Normal	Normal					Normal	Normal	3	13	6	No	No	No	No	Yes	No	No	No	No	No	No	No	No	No	No	Yes	No	Yes	No	No
593	80643	Normal	62	60-74		0-6 years	Female				Sub-Urban	140	100	24.09	0				Hypertension	Normal					Normal	Normal	0	0	10	Yes	No	No	No	No	No	No	No	No	Yes	Yes	Yes	Yes	No	Yes	Yes	No	Yes	Yes	Yes
594	80644	Normal	74	60-74	12	0-6 years	Male	Married	≥ monthly minimum wage	profesional	Sub-Urban	170	100	19.77	5				Hypertension	Normal				Smoking	Normal	Normal	2	0	9	Yes	No	No	No	No	No	No	No	No	Yes	Yes	No	No	No	No	Yes	No	Yes	No	Yes
595	80645	Normal	61	60-74		> 7 years	Male				Sub-Urban	200	110	29.24	0				Hypertension	Overweight					Normal	Normal	0	0	10	No	No	No	No	No	No	No	No	No	No	Yes	No	Yes	No	No	Yes	No	Yes	Yes	Yes
596	80646	Normal	60	60-74	5	> 7 years	Female	Married	No Income	housewife	Sub-Urban	120	90	30.22	0				Normal	Obesitas				Not Smoking	Normal	Normal	0	0	9	Yes	No	No	No	No	No	No	No	No	No	Yes	No	No	No	No	Yes	No	Yes	No	Yes
597	80647	Normal	71	60-74	6	0-6 years	Female	Married	No Income	housewife	Sub-Urban	190	100	28.19	1				Hypertension	Overweight					Normal	Normal	1	0	9	Yes	No	No	No	No	No	No	No	No	No	No	No	No	Yes	No	No	No	Yes	Yes	Yes
598	80648	Normal	80	>75	6	0-6 years	Male	Married	< monthly minimum wage	labour	Sub-Urban	115	90	19.89	0	159	190	35	Normal	Normal	Diabetes	Normal	High Risk	Smoking	Normal	Normal	0	0	8	Yes	No	No	No	No	No	No	No	No	No	Yes	No	Yes	No	No	Yes	No	Yes	Yes	No
599	80649	Normal	68	60-74	6	0-6 years	Female	Single	< monthly minimum wage	profesional	Sub-Urban	130	80	21.05	1				Normal	Normal				Not Smoking	Normal	Normal	0	0	8	No	No	No	No	No	No	No	No	No	No	No	No	No	No	No	Yes	No	Yes	Yes	Yes
600	80650	Normal	87	>75		0-6 years	Male				Sub-Urban	120	80	25.72	2				Normal	Overweight					Normal	Normal	5	0	8	Yes	No	No	No	Yes	No	No	No	No	Yes	Yes	No	Yes	No	Yes	Yes	No	Yes	Yes	No
601	80651	Normal	70	60-74	4	0-6 years	Female	Married	No Income	housewife	Sub-Urban	140	90	24.13	1				Normal	Normal					Normal	Normal	0	0	6	No	No	No	No	No	No	No	No	No	Yes	Yes	No	Yes	No	No	Yes	No	Yes	Yes	Yes
602	80652	Normal	62	60-74	9	> 7 years	Male	Married	≥ monthly minimum wage	profesional	Sub-Urban	120	80	23.69	0				Normal	Normal				Smoking	Normal	Normal	0	0	10	Yes	No	No	No	No	No	No	No	Yes	No	Yes	No	No	Yes	No	Yes	Yes	Yes	No	No
603	80653	Normal	67	60-74	12	0-6 years	Male	Married	No Income	notworking	Sub-Urban				3									Smoking	Normal	Normal	0	0	10	Yes	No	No	No	Yes	No	No	No	No	No	Yes	No	No	No	No	Yes	No	Yes	No	No
604	80654	Normal	74	60-74			Female				Sub-Urban	170	90	29.5	0	106	186	49	Hypertension	Overweight	Normal	Normal	Normal		Normal	Normal	1	0	9	Yes	No	No	No	No	No	No	No	Yes	Yes	Yes	No	Yes	No	No	Yes	No	Yes	No	Yes
605	80655	Normal	70	60-74			Male				Sub-Urban	140	80	17.86	1				Normal	Underweight					Normal	Normal	1	0	8	Yes	No	No	No	No	No	No	No	No	No	No	No	Yes	No	No	No	No	Yes	Yes	No
606	80656	Normal	65	60-74		> 7 years	Male				Sub-Urban	160	100	18.44	1				Hypertension	Underweight					Normal	Normal	1	3	9	Yes	No	No	No	No	No	No	Yes	No	No	Yes	No	No	No	No	Yes	No	Yes	No	No
607	80657	Dementia	78	>75			Female				Sub-Urban	170	90	17.48	1				Hypertension	Underweight					Normal	Normal	2	0	5	No	No	No	No	No	Yes	No	No	No	No	No	No	No	No	Yes	No	No	No	Yes	Yes
608	80658	Normal	64	60-74			Male				Sub-Urban	160	90	18.99	2				Hypertension	Normal					Normal	Normal	2	2	10	No	No	No	No	No	No	No	Yes	No	No	Yes	No	No	No	No	Yes	No	Yes	No	No
609	80659	Normal	76	>75			Female				Sub-Urban	180	110	30.27	0	106	176	52	Hypertension	Obesitas	Normal	Normal	Normal		Normal	Normal	1	9	10	Yes	No	No	No	No	No	No	Yes	No	No	No	No	No	No	No	Yes	No	No	No	No
610	80660	Normal	64	60-74			Female				Sub-Urban	120	80	20.04	1				Normal	Normal					Normal	Normal	3	2	9	Yes	No	No	No	No	No	No	Yes	No	No	No	No	No	No	No	Yes	No	Yes	No	No
611	80661	Dementia	64	60-74	3		Male				Sub-Urban	120	90	16.63	1	94	72	67	Normal	Underweight	Normal	Normal	Normal		Normal	Normal	5	13	3	No	No	No	No	No	No	No	No	No	No	No	No	Yes	No	No	No	No	Yes	No	No
612	80662	Normal	76	>75			Female				Sub-Urban	110	80	21.23	9				Normal	Normal					Normal	Normal	2	10	6	No	No	No	No	No	No	No	No	No	No	No	No	No	No	No	Yes	No	Yes	Yes	No
613	80663	Normal	66	60-74	6		Male	Married	No Income	notworking	Sub-Urban	110	70	25.52	3				Normal	Overweight					Normal	Normal	1	5	10	Yes	No	No	No	No	No	No	Yes	No	No	No	No	No	No	No	Yes	No	Yes	No	No
614	80664	Normal	80	>75	3		Female	Single	No Income	notworking	Sub-Urban	180	100	20.41	2				Hypertension	Normal				Not Smoking	Normal	Normal	2	0	8	No	No	No	No	No	No	No	No	No	No	No	No	No	No	No	No	No	Yes	No	No
615	80665	Normal	72	60-74	6		Male	Married	≥ monthly minimum wage	profesional	Sub-Urban	150	90	31.68	12	91	136	42	Hypertension	Obesitas	Normal	Normal	Normal	Not Smoking	Normal	Depression	1	8	9	No	No	No	No	No	No	No	No	No	No	Yes	No	Yes	No	No	Yes	No	Yes	No	No
616	80666	Normal	86	>75			Female				Sub-Urban			29.08	1	125	174	40		Overweight	Normal	Normal	Normal		Normal	Normal	0	10	6	Yes	No	No	No	No	No	No	No	No	Yes	Yes	No	Yes	No	No	Yes	No	Yes	No	Yes
617	80667	Normal	68	60-74			Female				Sub-Urban	145	90	19.6	0				Hypertension	Normal					Normal	Normal	2	0	10	Yes	No	No	No	No	No	No	No	No	No	Yes	No	No	No	No	Yes	No	Yes	Yes	Yes
618	80668	Dementia	60	60-74			Female				Sub-Urban	180	110	27.78	13				Hypertension	Overweight					Normal	Depression	0	6	7	No	No	No	No	No	No	No	No	No	No	No	No	No	No	No	Yes	No	Yes	No	No
619	80669	Normal	66	60-74	5		Female	Married	No Income	housewife	Sub-Urban	140	90	17.3	0				Normal	Underweight				Smoking	Normal	Normal	0	0	7	No	No	No	No	No	No	No	No	No	No	No	No	No	No	No	Yes	No	Yes	No	Yes
620	80670	Normal	76	>75			Female				Sub-Urban	180	100	22.16	0	77	87	80	Hypertension	Normal	Normal	Normal	Normal		Normal	Normal	1	0	7	Yes	No	No	No	No	No	No	No	No	No	No	No	Yes	No	No	Yes	No	Yes	No	Yes
621	80671	Normal	61	60-74	15		Male	Married	≥ monthly minimum wage	profesional	Sub-Urban	170	100	27.69	0				Hypertension	Overweight					Normal	Normal	0	0	10	Yes	No	No	No	Yes	No	No	No	No	Yes	Yes	No	No	No	No	Yes	No	Yes	Yes	No
622	80672	Normal	66	60-74	9		Male				Sub-Urban	130	80	20.26	2				Normal	Normal					Normal	Normal	1	0	10	Yes	No	No	No	No	No	No	No	Yes	Yes	Yes	No	No	No	No	Yes	No	Yes	Yes	No
623	80673	Normal	61	60-74		> 7 years	Female				Sub-Urban	125	80	19.15	0	86	73	72	Normal	Normal	Normal	Normal	Normal		Normal	Normal	0	0	10	Yes	No	No	No	Yes	No	No	No	No	Yes	Yes	No	Yes	No	Yes	Yes	No	No	No	No
624	80674	Normal	63	60-74	9		Male				Sub-Urban	160	100	24.59	3	130	271	35	Hypertension	Normal	Diabetes	High Risk	High Risk		Normal	Normal	2	0	10	Yes	No	No	No	Yes	No	No	No	Yes	No	Yes	No	No	No	No	Yes	No	Yes	No	No
625	80675	Normal	68	60-74		> 7 years	Male				Sub-Urban			19.33	6	114	157	25		Normal	Normal	Normal	High Risk		Normal	Normal	0	0	9	Yes	No	No	No	No	No	No	No	No	No	Yes	No	No	No	No	Yes	No	Yes	No	No
626	80676	Normal	80	>75	3		Male	Married	No Income	notworking	Sub-Urban	170	80	16.56	10				Hypertension	Underweight				Smoking	Normal	Depression	0	10	7	Yes	No	No	No	No	No	No	No	No	No	Yes	No	No	No	No	Yes	No	Yes	No	No
627	80677	Normal	72	60-74	6	0-6 years	Female				Sub-Urban	180	100	18.27	1				Hypertension	Underweight					Normal	Normal	0	0	10	No	No	No	No	No	Yes	No	No	No	No	Yes	No	No	No	No	No	No	Yes	Yes	Yes
628	80680	Dementia	68	60-74	9	> 7 years	Male	Single			Sub-Urban	150	100	14.64	3	93	123	38	Hypertension	Underweight	Normal	Normal	High Risk	Not Smoking	Normal	Normal	3	1	7	Yes	No	No	No	No	No	No	No	No	No	Yes	No	Yes	No	No	Yes	No	Yes	Yes	Yes
629	80681	Normal	62	60-74	6	0-6 years	Male	Married	No Income	notworking	Sub-Urban	100	80	20.83	6	137	201	30	Normal	Normal	Diabetes	High Risk	High Risk	Smoking	Normal	Normal	1	0	9	Yes	No	No	No	No	No	No	No	No	No	No	No	Yes	No	Yes	Yes	No	Yes	Yes	No
630	80682	Dementia	82	>75	6	0-6 years	Female	Single	No Income	housewife	Sub-Urban	110	80		11	118	51	46	Normal		Normal	Normal	Normal		Normal	Depression	7	19	3
631	80683	Normal	60	60-74	6	0-6 years	Female	Married	No Income	housewife	Sub-Urban	112	78	16.88	2				Normal	Underweight					Normal	Normal	3	0	7	No	No	No	No	Yes	No	No	No	No	No	Yes	No	No	No	No	No	No	Yes	Yes	Yes
632	80684	Normal	64	60-74	6	0-6 years	Male	Married	No Income	notworking	Sub-Urban	140	90	25.24	5	96	402	29	Normal	Overweight	Normal	High Risk	High Risk	Not Smoking	Normal	Normal	3	2	10	No	No	No	No	No	No	No	No	No	No	No	No	Yes	No	Yes	Yes	No	Yes	Yes	Yes
633	80685	Dementia	78	>75	2	0-6 years	Female	Single	No Income	housewife	Sub-Urban	158	70		7	86	69	47	Hypertension		Normal	Normal	Normal		Normal	Normal	4	3	5	No	No	No	No	No	No	No	No	No	No	No	No	No	No	No	Yes	No	Yes	Yes	Yes
634	80686	Normal	60	60-74	12	> 7 years	Female	Married	No Income	housewife	Sub-Urban	150	90	25.2	4	91	129	55	Hypertension	Overweight	Normal	Normal	Normal		Normal	Normal	0	0	9	No	No	No	Yes	No	No	No	No	No	No	No	No	No	No	No	No	No	No	No	Yes
635	80687	Normal	71	60-74	6	0-6 years	Male	Married	< monthly minimum wage	labour	Sub-Urban	160	80	19.4	7	80	116	39	Hypertension	Normal	Normal	Normal	High Risk	Smoking	Normal	Normal	1	2	7	Yes	No	No	No	No	No	No	No	No	No	Yes	No	No	No	No	No	No	Yes	No	No
636	80688	Normal	60	60-74	6	0-6 years	Female	Married	No Income	notworking	Sub-Urban	130	80	28.51	13	114	370	48	Normal	Overweight	Normal	High Risk	Normal		Normal	Depression	3		8	Yes	No	No	No	No	No	No	No	Yes	No	No	No	No	No	No	Yes	No	Yes	No	Yes
637	80689	Normal	60	60-74	6	0-6 years	Female	Married	No Income	housewife	Sub-Urban	120	80	21.05	3	62	82	63	Normal	Normal	Normal	Normal	Normal		Normal	Normal	2	2	9	Yes	No	No	No	No	No	No	No	No	No	Yes	No	No	No	No	Yes	No	Yes	Yes	Yes
638	80690	Normal	60	60-74	6	0-6 years	Female	Married	No Income	housewife	Sub-Urban	130	80	21.37	0	96	50	63	Normal	Normal	Normal	Normal	Normal		Normal	Normal	2	0	9	Yes	No	No	No	No	No	No	No	No	No	Yes	No	No	No	No	Yes	No	Yes	No	No
639	80691	Normal	81	>75	6	0-6 years	Male	Married			Sub-Urban	170	90	25.71	0	110	521	32	Hypertension	Overweight	Normal	High Risk	High Risk	Not Smoking	Normal	Normal	5	2	8	No	No	No	No	No	No	No	No	No	No	No	Yes	No	No	No	No	No	Yes	No	No
640	80692	Normal	61	60-74	6	0-6 years	Female	Married	No Income	housewife	Sub-Urban	130	70	16.44	5	88	104	57	Normal	Underweight	Normal	Normal	Normal		Normal	Normal	2	1	8	Yes	No	No	No	No	No	No	No	No	No	No	No	No	No	No	Yes	No	Yes	No	No
641	80693	Normal	63	60-74	1	0-6 years	Female	Single	No Income	housewife	Sub-Urban	140	90	20.93	1	102	102	58	Normal	Normal	Normal	Normal	Normal		Normal	Normal	0	0	9	No	No	No	No	No	No	No	No	No	No	No	No	No	No	No	Yes	No	Yes	No	Yes
642	80694	Normal	73	60-74	5	0-6 years	Female	Married	No Income	notworking	Sub-Urban	200	120		0	104	66	53	Hypertension		Normal	Normal	Normal		Normal	Normal	7	12	8	Yes	No	No	No	No	No	No	No	No	No	No	No	No	No	No	No	No	Yes	Yes	No
643	80695	Normal	73	60-74	5	0-6 years	Female	Married	No Income	notworking	Sub-Urban	130	80	22.18	6	90	114	55	Normal	Normal	Normal	Normal	Normal		Normal	Normal	5	0	10	No	No	No	No	No	No	No	No	No	No	No	No	No	No	No	Yes	No	Yes	Yes	No
644	80696	Normal	71	60-74	5	0-6 years	Female	Single	No Income	housewife	Sub-Urban	190	100	29.62	6	127	377	46	Hypertension	Overweight	Diabetes	High Risk	Normal		Normal	Normal	6	10	8	Yes	No	No	No	No	No	No	No	No	No	No	Yes	No	No	Yes	No	No	Yes	No	No
645	80697	Normal	61	60-74	6	0-6 years	Female	Married	No Income	housewife	Sub-Urban	130	80	23.62	2	106	135	38	Normal	Normal	Normal	Normal	High Risk		Normal	Normal	2	0	9	No	No	No	No	No	No	No	No	No	No	No	No	No	No	No	Yes	No	Yes	No	Yes
646	80698	Normal	74	60-74	3	0-6 years	Female	Married	No Income	housewife	Sub-Urban				2	90	56	62			Normal	Normal	Normal		Normal	Normal	4	1	7	Yes	No	No	No	No	No	No	No	No	No	No	Yes	No	No	No	Yes	No	Yes	Yes	Yes
647	80699	Normal	63	60-74	6	0-6 years	Male	Single	≥ monthly minimum wage	profesional	Sub-Urban	138	90	22.04	1				Normal	Normal				Not Smoking	Normal	Normal	0	0	8	Yes	No	No	No	No	No	No	No	No	No	Yes	No	Yes	No	Yes	Yes	No	Yes	Yes	Yes
648	80700	Normal	65	60-74	6	0-6 years	Male	Married	No Income	notworking	Sub-Urban	250	110	26.06	1	113	339	24	Hypertension	Overweight	Normal	High Risk	High Risk	Smoking	stroke	Normal	1	1	10	Yes	No	No	No	Yes	No	No	No	No	No	Yes	No	No	No	No	Yes	Yes	Yes	Yes	Yes
649	80701	Normal	68	60-74	2	0-6 years	Male	Married	No Income	notworking	Sub-Urban	130	80	18.73	7	92	276	45	Normal	Normal	Normal	High Risk	Normal	Smoking	Normal	Normal	1	0	9	Yes	No	No	No	Yes	No	No	No	No	No	Yes	No	No	No	No	Yes	No	Yes	Yes	No
650	80702	Dementia	81	>75	2	0-6 years	Male	Single	No Income	notworking	Sub-Urban	100	60	16.59	4	83	109	47	Normal	Underweight	Normal	Normal	Normal	Smoking	Normal	Normal	5	10	4	No	No	No	No	No	No	No	No	No	No	No	No	No	No	No	Yes	No	Yes	No	No
651	80703	Normal	75	>75	2	0-6 years	Male	Married	No Income	notworking	Sub-Urban	180	110	19.63	5				Hypertension	Normal				Not Smoking	Normal	Normal	4	0	9	Yes	No	No	No	Yes	No	No	No	No	Yes	Yes	No	Yes	No	No	Yes	No	Yes	Yes	No
652	80704	Dementia	80	>75	0	0-6 years	Female	Single	No Income	housewife	Sub-Urban	140	100	13.2	3				Hypertension	Underweight					Normal	Normal	4	0	3	No	No	No	No	No	No	No	No	No	No	No	No	Yes	No	No	Yes	No	Yes	No	Yes
653	80705	Normal	80	>75	6	0-6 years	Male	Married	No Income	notworking	Sub-Urban				3										Normal	Normal	0	2	6	No	No	No	No	Yes	No	No	No	No	No	Yes	No	Yes	No	No	Yes	No	Yes	Yes	Yes
654	80706	Normal	73	60-74	5	0-6 years	Female	Single	No Income	housewife	Sub-Urban	180	90	22.35	5	122	248	51	Hypertension	Normal	Normal	High Risk	Normal		Normal	Normal	0	3	6	No	No	No	No	No	Yes	No	No	No	Yes	Yes	No	Yes	No	Yes	No	No	Yes	Yes	No
655	80707	Normal	67	60-74	6	0-6 years	Female		No Income	housewife	Sub-Urban	180	90	24.65	4	101	129	66	Hypertension	Normal	Normal	Normal	Normal		Normal	Normal	4	8	6	No	No	No	No	No	No	No	No	No	No	No	No	No	No	No	Yes	No	Yes	No	No
656	80708	Dementia			3	0-6 years	Female	Single	< monthly minimum wage	profesional	Sub-Urban	170	100	17.85	10	95	99	50	Hypertension	Underweight	Normal	Normal	Normal	Not Smoking	Normal	Depression	4	5	5	Yes	No	No	No	No	No	No	No	No	Yes	Yes	No	No	No	No	Yes	No	Yes	Yes	No
657	80709	Normal	75	>75	3	0-6 years	Female	Single	No Income	housewife	Sub-Urban	200	120	27.19	6	329	168	40	Hypertension	Overweight	Diabetes	Normal	Normal		Normal	Normal	7	14	8	Yes	No	No	No	No	No	No	No	No	No	No	No	No	No	No	No	No	Yes	Yes	No
658	80710	Normal	66	60-74	6	0-6 years	Female	Single	≥ monthly minimum wage	profesional	Sub-Urban	160	100	22.81	0	82	70	56	Hypertension	Normal	Normal	Normal	Normal		Normal	Normal	1	0	9	Yes	No	No	No	Yes	No	No	Yes	No	Yes	Yes	No	Yes	No	No	Yes	No	Yes	Yes	Yes
659	80711	Normal	60	60-74	6	0-6 years	Female	Married	No Income	housewife	Sub-Urban	120	80	21.19	1	108	152	56	Normal	Normal	Normal	Normal	Normal		Normal	Normal	3	1	10	Yes	No	No	No	Yes	No	No	No	No	No	Yes	No	No	No	No	Yes	No	Yes	Yes	Yes
660	80712	Dementia			4	0-6 years	Female	Married			Sub-Urban	200	110	15.64	7				Hypertension	Underweight					stroke	Normal	3	16	3	No	No	No	No	No	No	No	No	No	No	No	No	No	No	No	Yes	No	No	No	No
661	80713	Normal	62	60-74	6	0-6 years	Male	Married	< monthly minimum wage	labour	Sub-Urban	140	90	17.48	7				Normal	Underweight				Smoking	Normal	Normal	1	0	9	No	No	Yes	No	Yes	No	No	No	No	Yes	Yes	No	Yes	No	No	Yes	No	Yes	Yes	Yes
662	80714	Dementia	86	>75	2	0-6 years	Female	Single			Sub-Urban	140	100	22.89	5				Hypertension	Normal					Normal	Normal	5	12	4	No	No	No	No	No	No	No	No	No	No	No	No	No	No	No	Yes	No	Yes	No	No
663	80715	Normal	69	60-74	6	0-6 years	Female	Married	No Income	notworking	Sub-Urban	140	90	24.53	3				Normal	Normal				Smoking	Normal	Normal	0		9	Yes	No	No	No	No	No	No	No	No	No	No	No	Yes	No	No	Yes	No	Yes	Yes	Yes
664	80716	Normal	64	60-74	6	0-6 years	Female	Single	No Income	notworking	Sub-Urban	190	100	28.61	4				Hypertension	Overweight				Not Smoking	Normal	Normal	0	0	9	Yes	No	No	No	No	Yes	No	No	No	No	Yes	No	Yes	No	No	Yes	No	Yes	Yes	Yes
665	80717	Normal	66	60-74	3	> 7 years	Female	Single	No Income	notworking	Sub-Urban	180	100	24.17	4	84	52	56	Hypertension	Normal	Normal	Normal	Normal	Not Smoking	Normal	Normal	3	1	8	Yes	No	No	No	Yes	No	No	No	No	No	Yes	No	Yes	No	No	Yes	No	Yes	Yes	Yes
666	80718	Normal	67	60-74		0-6 years	Female	Married			Sub-Urban	150	80	23.92	2				Hypertension	Normal					stroke	Normal	0	0	8	No	No	No	No	No	No	No	No	No	No	No	No	Yes	No	No	Yes	No	No	No	No
667	80719	Normal	61	60-74	9	0-6 years	Male	Married	< monthly minimum wage	labour	Sub-Urban	180	100	22.86	5				Hypertension	Normal				Smoking	stroke	Normal	5	0	9	Yes	No	No	No	Yes	No	No	No	No	No	Yes	No	Yes	No	No	Yes	No	Yes	No	No
668	80720	Normal	64	60-74	4	0-6 years	Male	Married	< monthly minimum wage	profesional	Sub-Urban	130	80	19.1	0				Normal	Normal				Smoking	Normal	Normal	1	0	8	Yes	No	No	No	Yes	No	No	No	No	No	Yes	No	No	No	No	Yes	No	Yes	No	No
669	80721	Normal	68	60-74	3	> 7 years	Female	Married	No Income	housewife	Sub-Urban	140	80	21.87	3	124	136	49	Normal	Normal	Normal	Normal	Normal		Normal	Normal	1	0	9	Yes	No	No	No	No	No	No	No	No	No	Yes	No	No	No	No	Yes	No	Yes	Yes	Yes
670	80722	Normal	62	60-74	6	0-6 years	Male	Married	≥ monthly minimum wage	profesional	Sub-Urban	140	80	20.29	5				Normal	Normal				Smoking	Normal	Normal	0	1	6	Yes	No	No	No	No	No	No	No	No	Yes	Yes	No	No	No	No	Yes	No	Yes	No	Yes
671	80723	Normal	75	>75	9	0-6 years	Male	Single	≥ monthly minimum wage	profesional	Sub-Urban				2									Not Smoking	stroke	Normal	5	0	10	Yes	No	No	No	No	No	No	No	No	No	Yes	No	No	No	No	Yes	No	Yes	Yes	No
672	80724	Normal	61	60-74	6	0-6 years	Male	Married	< monthly minimum wage	labour	Sub-Urban				2									Smoking	stroke	Normal	4	0	9	Yes	No	No	No	No	No	No	No	No	No	No	No	No	No	No	Yes	No	Yes	Yes	No
673	80725	Normal	69	60-74	3		Male	Married	< monthly minimum wage	labour	Sub-Urban	130	80	19.57	5				Normal	Normal					stroke	Normal	1	0	8	No	No	No	No	No	No	No	No	No	No	Yes	No	No	No	No	Yes	No	Yes	No	No
674	80726	Dementia	75	>75	3	0-6 years	Male	Married	< monthly minimum wage	profesional	Sub-Urban	180	100	15.96	3	78	54	58	Hypertension	Underweight	Normal	Normal	Normal	Smoking	stroke	Normal	4	11	5	No	No	No	No	No	No	No	No	No	Yes	No	No	Yes	No	No	Yes	No	Yes	Yes	No
675	80727	Dementia	67	60-74	6	0-6 years	Male	Married	≥ monthly minimum wage	profesional	Sub-Urban	140	100	17.04	2	78	117	56	Hypertension	Underweight	Normal	Normal	Normal	Smoking	stroke	Normal	1	2	4	No	No	No	No	No	No	No	No	No	No	No	No	No	No	No	Yes	No	No	No	No
676	80728	Normal	63	60-74	6	0-6 years	Female	Married	≥ monthly minimum wage	housewife	Sub-Urban	142	72	14.93	5	103	136	34	Hypertension	Underweight	Normal	Normal	High Risk		stroke	Normal	2	0	7	Yes	No	No	No	No	No	No	No	No	No	No	No	Yes	No	No	Yes	No	Yes	Yes	Yes
677	80729	Normal	68	60-74	2	0-6 years	Female	Married	No Income	notworking	Sub-Urban	170	100	22.92	3	110	81	63	Hypertension	Normal	Normal	Normal	Normal		Normal	Normal	3	1	6	Yes	No	No	No	No	No	No	No	Yes	No	No	No	No	No	No	Yes	No	Yes	No	Yes
678	80730	Dementia	80	>75	0	0-6 years	Female	Married	No Income	notworking	Sub-Urban	140	95	19.02	5	88	145	50	Hypertension	Normal	Normal	Normal	Normal		Normal	Normal	0	16	2	No	No	No	No	No	No	No	No	No	No	No	No	No	No	No	No	No	Yes	Yes	Yes
679	80731	Normal	61	60-74	6	0-6 years	Male	Married	≥ monthly minimum wage	housewife	Sub-Urban				1										Normal	Normal	0	0	7	Yes	No	No	No	No	No	No	No	No	Yes	No	No	Yes	No	Yes	Yes	No	Yes	Yes	Yes
680	80732	Dementia	61	60-74	9	> 7 years	Female	Married	No Income	housewife	Sub-Urban	138	82	21.74	4				Normal	Normal					Normal	Normal	3	2	7	No	No	No	No	No	No	No	No	No	No	Yes	No	No	No	No	Yes	No	Yes	No	Yes
681	80733	Normal	65	60-74	6	0-6 years	Female	Married	No Income	housewife	Sub-Urban	134	78	23.4	2	283	252	36	Normal	Normal	Diabetes	High Risk	High Risk		Normal	Normal	0	0	8	No	No	No	Yes	No	No	No	No	No	No	No	No	Yes	No	Yes	Yes	No	Yes	Yes	Yes
682	80734	Normal	61	60-74	8	> 7 years	Female	Married	No Income	housewife	Sub-Urban	130	90	25.09	0	103	374	39	Normal	Overweight	Normal	High Risk	High Risk		Normal	Normal	2	0	9	Yes	No	No	No	No	No	No	No	No	Yes	No	Yes	No	No	No	Yes	No	Yes	Yes	Yes
683	80735	Normal	66	60-74	6	0-6 years	Male	Married	< monthly minimum wage	profesional	Sub-Urban	160	100	24.99	0	170	233	37	Hypertension	Normal	Diabetes	High Risk	High Risk	Smoking	Normal	Normal	0	0	9	Yes	No	No	No	No	No	No	No	No	No	No	No	No	No	No	Yes	No	No	No	No
684	80736	Normal	60	60-74	6	0-6 years	Male	Married	< monthly minimum wage	profesional	Sub-Urban	120	80	19.27	1				Normal	Normal				Smoking	Normal	Normal	0	0	9	Yes	No	No	No	Yes	Yes	No	No	No	No	Yes	No	Yes	No	Yes	Yes	No	Yes	Yes	Yes
685	80737	Normal	60	60-74	6	0-6 years	Male	Married	≥ monthly minimum wage	profesional	Sub-Urban	120	90	24.65	7				Normal	Normal				Smoking	Normal	Normal	0	2	6	No	No	No	No	No	No	No	No	No	No	Yes	No	No	No	No	Yes	No	Yes	Yes	No
686	80738	Normal	63	60-74	6	0-6 years	Male	Married	< monthly minimum wage	profesional	Sub-Urban	150	100	19.23	4	120	137	54	Hypertension	Normal	Normal	Normal	Normal	Smoking	Normal	Normal	0	0	9	Yes	No	Yes	No	No	No	No	No	No	No	Yes	No	Yes	No	Yes	Yes	No	Yes	Yes	Yes
[truncated: 29 more columns]
